# Supplementary material for: Somatic Mutagenesis with a Sleeping Beauty Transposon System Leads to Solid Tumor Formation in Zebrafish
Source: PLoS One. 2011 Apr 21;6(4):e18826. doi: 10.1371/journal.pone.0018826 (PMC3080878; doi:10.1371/journal.pone.0018826)
Supplement: Dataset S1 — Tabs are provided for all T2/OncZ integration sites from SB11 mRNA injected tumor and control zebrafish (all sites SB11 injected), and all T2/OncZ integration sites from tumor and control zebrafish with Tg ( Tol2< ß -actin:SB11 , cmlc2:GFP> ) (all sites BaSB11 transgene). (XLS) [file pone.0018826.s001.xls]

## Sheet: all sites SB11 injected
All reads from SB11 mRNA injected T2/OncZ concatemer fish.
BfaI reads from left side of T2/OncZ NlaIII reads from right side of T2/OncZ
Sample ID	gene	position	impact or distance from gene	chromosome	base position	# reads	orientation relative to gene
1aC_NlaIII_SBONC6	zgc:110692	exon 9	within gene	chr15	71002	11498	OPPOSITE
1aC_NlaIII_SBONC6	zgc:112435	3 prime	9.749 kb	chr6	61076595	9349	SAME
1aC_NlaIII_SBONC6				chr5	11428938	2347
1aC_NlaIII_SBONC6	kcnq3	exon 11	within gene	chr2	42100791	1693	OPPOSITE
1aC_NlaIII_SBONC6	slc39a7	3 prime	0.046 kb	chr19	13129561	1650	OPPOSITE
1aC_NlaIII_SBONC6	ada	intron 8	within gene	chr23	25415405	1553	OPPOSITE
1aC_NlaIII_SBONC6	bactin2	intron 1	within gene	chr3	37652226	1528	SAME
1aC_NlaIII_SBONC6	wars	3 prime	84.325 kb	chr17	722460	1405	OPPOSITE
1aC_NlaIII_SBONC6	mbnl1	3 prime	131.838 kb	chr2	45906188	1029	OPPOSITE
1aC_NlaIII_SBONC6	zswim6	3 prime	2.200 kb	chr10	42940577	926	OPPOSITE
1aC_NlaIII_SBONC6	erlin2	3 prime	10.108 kb	chr5	33924693	815	OPPOSITE
1aC_NlaIII_SBONC6	pak2a	intron 13	within gene	chr2	34676050	770	OPPOSITE
1aC_NlaIII_SBONC6	zcchc9	3 prime	8.103 kb	chr10	40902062	770	OPPOSITE
1aC_NlaIII_SBONC6	slc30a5	5 prime	50.621 kb	chr5	56187296	764	SAME
1aC_NlaIII_SBONC6	braf	intron 3	within gene	chr4	11694643	663	SAME
1aC_NlaIII_SBONC6	txlna	5 prime	62.825 kb	chr19	28854203	647	SAME
1aC_NlaIII_SBONC6	zgc:66160	3 prime	100.369 kb	chr3	24883728	632	SAME
1aC_NlaIII_SBONC6	lim2.5	intron 3	within gene	chr16	48103962	562	OPPOSITE
1aC_NlaIII_SBONC6	zfpm2b	5 prime	155.445 kb	chr19	45842220	502	SAME
1aC_NlaIII_SBONC6	zgc:158151	intron 2	within gene	chr16	16450243	499	OPPOSITE
1aC_NlaIII_SBONC6	foxp2	intron 3	within gene	chr4	5323528	498	OPPOSITE
1aC_NlaIII_SBONC6				chr13	28270356	468
1aC_NlaIII_SBONC6	zdhhc24	3 prime	25.219 kb	chr14	35317541	447	OPPOSITE
1aC_NlaIII_SBONC6	mycbp2	intron 8	within gene	chr9	15917243	446	SAME
1aC_NlaIII_SBONC6	pts	5 prime	22.868 kb	chr12	1153533	442	SAME
1aC_NlaIII_SBONC6				chr3	44176498	397
1aC_NlaIII_SBONC6	pcgf5a	5 prime	49.607 kb	chr17	21150215	355	OPPOSITE
1aC_NlaIII_SBONC6	rab18a	exon 7	within gene	chr12	26914015	318	OPPOSITE
1aC_NlaIII_SBONC6	zgc:63831	3 prime	3.105 kb	chr3	22103381	306	OPPOSITE
1aC_NlaIII_SBONC6	ntm	intron 2	within gene	chr10	28594648	292	OPPOSITE
1aC_NlaIII_SBONC6	zgc:55461	5 prime	57.274 kb	chr5	31406233	257	OPPOSITE
1aC_NlaIII_SBONC6	pmpcb	intron 7	within gene	chr4	2268934	240	OPPOSITE
1aC_NlaIII_SBONC6	icn2	intron 1	within gene	chr16	22005799	239	OPPOSITE
1aC_NlaIII_SBONC6	pmpcb	intron 7	within gene	chr4	2268916	231	OPPOSITE
1aC_NlaIII_SBONC6				chr23	9730063	231
1aC_NlaIII_SBONC6	fam46b	3 prime	11.432 kb	chr16	32974427	218	SAME
1aC_NlaIII_SBONC6	ankk1	5 prime	55.083 kb	chr15	22140668	211	SAME
1aC_NlaIII_SBONC6				chr16	15305696	211
1aC_NlaIII_SBONC6	twist1b	5 prime	22.263 kb	chr16	17717997	211	SAME
1aC_NlaIII_SBONC6	clcn7	intron 10	within gene	chr3	25059504	200	SAME
1aC_NlaIII_SBONC6				chr15	33876412	186
1aC_NlaIII_SBONC6	si:dkey-251i10.1	3 prime	18.703 kb	chr5	69204101	184	SAME
1aC_NlaIII_SBONC6	mxi1	3 prime	2.354 kb	chr22	32897077	183	SAME
1aC_NlaIII_SBONC6	si:dkey-175c11.1	5 prime	64.887 kb	chr5	17626711	175	SAME
1aC_NlaIII_SBONC6	txndc5	5 prime	19.698 kb	chr24	7932766	175	SAME
1aC_NlaIII_SBONC6	arl4a	5 prime	18.465 kb	chr15	33101020	173	OPPOSITE
1aC_NlaIII_SBONC6	mios	5 prime	23.763 kb	chr16	46583885	167	SAME
1aC_NlaIII_SBONC6	sept7a	intron 10	within gene	chr19	10837996	149	SAME
1aC_NlaIII_SBONC6	prickle2	intron 1	within gene	chr11	18849955	143	OPPOSITE
1aC_NlaIII_SBONC6	insl5a	3 prime	93.170 kb	chr6	32617237	134	OPPOSITE
1aC_NlaIII_SBONC6	dct	5 prime	10.973 kb	chr9	52026425	131	SAME
1aC_NlaIII_SBONC6	per3	intron 5	within gene	chr11	40256066	128	SAME
1aC_NlaIII_SBONC6	si:dkey-6e12.6	3 prime	82.984 kb	chr18	22928251	127	OPPOSITE
1aC_NlaIII_SBONC6	pfdn5	3 prime	13.387 kb	chr6	43201438	124	SAME
1aC_NlaIII_SBONC6	ccne2	3 prime	46.834 kb	chr16	39500273	106	OPPOSITE
1aC_NlaIII_SBONC6	si:ch211-254e15.1	intron 1	within gene	chr19	34104641	106	SAME
1aC_NlaIII_SBONC6				chr7	72122927	105
1aC_NlaIII_SBONC6	zgc:66160	3 prime	100.369 kb	chr3	24883728	94	OPPOSITE
1aC_NlaIII_SBONC6	pmpcb	intron 7	within gene	chr4	2268918	87	OPPOSITE
1aC_NlaIII_SBONC6				chr19	46839358	80
1aC_NlaIII_SBONC6	sms	5 prime	92.158 kb	chr21	27677541	72	OPPOSITE
1aC_NlaIII_SBONC6	parp3	5 prime	41.503 kb	chr6	45732236	71	OPPOSITE
1aC_NlaIII_SBONC6	pbx2	5 prime	37.667 kb	chr16	46666426	68	OPPOSITE
1aC_NlaIII_SBONC6	c3orf58a	5 prime	83.464 kb	chr2	7538706	66	SAME
1aC_NlaIII_SBONC6	ehd3	5 prime	57.225 kb	chr20	38076879	65	SAME
1aC_NlaIII_SBONC6	bactin2	intron 1	within gene	chr3	37651751	64	OPPOSITE
1aC_NlaIII_SBONC6				chr7	41566208	63
1aC_NlaIII_SBONC6				chr17	6464573	61
1aC_NlaIII_SBONC6	atoh2a	5 prime	36.035 kb	chr24	32139731	60	OPPOSITE
1aC_NlaIII_SBONC6	rgl2	5 prime	92.178 kb	chr16	44596030	55	SAME
1aC_NlaIII_SBONC6	map4k2l	intron 3	within gene	chr7	16999730	54	OPPOSITE
1aC_NlaIII_SBONC6	si:rp71-56i13.6	intron 3	within gene	chr10	27976163	51	SAME
1aC_NlaIII_SBONC6	igdcc3	5 prime	69.856 kb	chr7	31998974	49	SAME
1aC_NlaIII_SBONC6	bactin2	5 prime	0.029 kb	chr3	37652971	46	OPPOSITE
1aC_NlaIII_SBONC6	si:dkey-1h24.2	intron 3	within gene	chr1	23858412	45	OPPOSITE
1aC_NlaIII_SBONC6	pdlim2	intron 6	within gene	chr8	35075378	45	SAME
1aC_NlaIII_SBONC6				chr17	16310803	42
1aC_NlaIII_SBONC6	si:ch211-113p18.5	3 prime	54.709 kb	chr15	12175741	42	OPPOSITE
1aC_NlaIII_SBONC6	picalm	intron 1	within gene	chr10	26814414	40	OPPOSITE
1aC_NlaIII_SBONC6	rps9	5 prime	32.774 kb	chr16	44371487	39	OPPOSITE
1aC_NlaIII_SBONC6	acvrl1	intron 3	within gene	chr23	27294366	39	OPPOSITE
1aC_NlaIII_SBONC6	fam168a	5 prime	3.908 kb	chr18	3405047	38	SAME
1aC_NlaIII_SBONC6	ret1	intron 17	within gene	chr13	26345031	37	OPPOSITE
1aC_NlaIII_SBONC6	clybl	intron 1	within gene	chr9	31581393	36	OPPOSITE
1aC_NlaIII_SBONC6	cyp27c1	5 prime	12.171 kb	chr6	10533057	33	SAME
1aC_NlaIII_SBONC6				chr6	46649756	32
1aC_NlaIII_SBONC6	camk2g1	5 prime	41.064 kb	chr12	34416431	31	OPPOSITE
1aC_NlaIII_SBONC6	kars	3 prime	1.406 kb	chr7	71635551	31	OPPOSITE
1aC_NlaIII_SBONC6	ccnt2	intron 3	within gene	chr9	22593972	30	OPPOSITE
1aC_NlaIII_SBONC6	si:ch211-106a19.1	intron 6	within gene	chr5	22614491	29	OPPOSITE
1aC_NlaIII_SBONC6	zgc:153426	5 prime	76.035 kb	chr3	44280481	29	OPPOSITE
1aC_NlaIII_SBONC6	dpy19l1l	5 prime	24.884 kb	chr16	42088930	29	OPPOSITE
1aC_NlaIII_SBONC6	vwc2l	3 prime	48.647 kb	chr9	40922648	29	SAME
1aC_NlaIII_SBONC6	lmx1b.1	5 prime	26.751 kb	chr8	34164799	27	SAME
1aC_NlaIII_SBONC6	zgc:162592	5 prime	9.248 kb	chr7	71888600	26	OPPOSITE
1aC_NlaIII_SBONC6	mir16b	exon 1	within gene	chr1	46862496	26	SAME
1aC_NlaIII_SBONC6	zgc:110426	5 prime	17.749 kb	chr14	17033789	24	OPPOSITE
1aC_NlaIII_SBONC6				chr14	46891974	24
1aC_NlaIII_SBONC6	rgl2	5 prime	92.176 kb	chr16	44596032	24	SAME
1aC_NlaIII_SBONC6	eif3ha	intron 1	within gene	chr16	44126845	23	SAME
1aC_NlaIII_SBONC6				chr1	3870686	23
1aC_NlaIII_SBONC6	brd2b	5 prime	37.391 kb	chr16	44459041	23	OPPOSITE
1aC_NlaIII_SBONC6	unc119.1	5 prime	1.722 kb	chr8	40477176	22	SAME
1aC_NlaIII_SBONC6	vip	5 prime	4.058 kb	chr13	47012832	21	SAME
1aC_NlaIII_SBONC6	runx1	5 prime	35.449 kb	chr1	1355861	21	SAME
1aC_NlaIII_SBONC6	snupn	3 prime	33.938 kb	chr25	5326855	20	OPPOSITE
1aC_NlaIII_SBONC6	zgc:113250	5 prime	12.460 kb	chr3	6923468	20	OPPOSITE
1aC_NlaIII_SBONC6	LOC560360	intron 1	within gene	chr24	15838069	20	OPPOSITE
1aC_NlaIII_SBONC6	pofut2	3 prime	79.074 kb	chr9	41051514	19	OPPOSITE
1aC_NlaIII_SBONC6				chr23	21411488	19
1aC_NlaIII_SBONC6	zgc:173624	5 prime	14.914 kb	chr4	66399085	18	SAME
1aC_NlaIII_SBONC6	pcsk1	intron 9	within gene	chr21	9424869	18	OPPOSITE
1aC_NlaIII_SBONC6	si:dkey-222p3.1	3 prime	63.858 kb	chr22	29223408	18	SAME
1aC_NlaIII_SBONC6	fzd8a	5 prime	68.925 kb	chr24	4475522	18	SAME
1aC_NlaIII_SBONC6	gpc4	intron 2	within gene	chr14	32384837	15	SAME
1aC_NlaIII_SBONC6	bin2b	exon 11	within gene	chr6	42439327	14	OPPOSITE
1aC_NlaIII_SBONC6	crtap	3 prime	16.203 kb	chr19	41991975	14	SAME
1aC_NlaIII_SBONC6	eif3eb	3 prime	88.103 kb	chr19	21398884	14	SAME
1aC_NlaIII_SBONC6	ctnna	3 prime	44.153 kb	chr14	50608251	14	OPPOSITE
1aC_NlaIII_SBONC6	ext1a	3 prime	5.872 kb	chr16	44300434	13	OPPOSITE
1aC_NlaIII_SBONC6	zgc:64136	intron 4	within gene	chr7	19558331	13	OPPOSITE
1aC_NlaIII_SBONC6	insrb	intron 2	within gene	chr22	13257708	13	SAME
1aC_NlaIII_SBONC6	arpc5lb	3 prime	14.890 kb	chr5	30161874	12	SAME
1aC_NlaIII_SBONC6	arpc5lb	3 prime	14.890 kb	chr5	30161874	12	OPPOSITE
1aC_NlaIII_SBONC6	LOC566888	intron 1	within gene	chr15	32214698	11	SAME
1aC_NlaIII_SBONC6	si:dkey-85n7.5	3 prime	26.771 kb	chr20	26996255	11	SAME
1aC_NlaIII_SBONC6				chr17	7882268	11
1aC_NlaIII_SBONC6	zcchc9	3 prime	8.103 kb	chr10	40902062	11	SAME
1aC_NlaIII_SBONC6	eif3ha	intron 1	within gene	chr16	44126845	11	OPPOSITE
1aC_NlaIII_SBONC6	anp32e	3 prime	14.521 kb	chr19	41637330	10	OPPOSITE
1aC_NlaIII_SBONC6	pmpcb	intron 7	within gene	chr4	2268914	9	OPPOSITE
1aC_NlaIII_SBONC6				chr16	15305696	9
1aC_NlaIII_SBONC6	zgc:64189	5 prime	40.454 kb	chr14	29639411	9	SAME
1aC_NlaIII_SBONC6	si:busm1-160c18.3	3 prime	49.634 kb	chr3	56564259	9	SAME
1aC_NlaIII_SBONC6	fam8a1	3 prime	15.115 kb	chr16	24101459	9	SAME
1aC_NlaIII_SBONC6				chr5	16652892	9
1aC_NlaIII_SBONC6	wdr24	intron 10	within gene	chr24	35948318	9	SAME
1aC_NlaIII_SBONC6	si:dkey-255n2.1	intron 1	within gene	chr19	31949143	8	SAME
1aC_NlaIII_SBONC6	si:dkey-14o18.5	intron 9	within gene	chr19	9320485	8	OPPOSITE
1aC_NlaIII_SBONC6	bactin2	5 prime	0.027 kb	chr3	37652969	8	OPPOSITE
1aC_NlaIII_SBONC6	rps9	5 prime	72.193 kb	chr16	44410906	8	SAME
1aC_NlaIII_SBONC6				chr12	40072282	8
1aC_NlaIII_SBONC6				chr2	17242229	8
1aC_NlaIII_SBONC6	nlgn2b	intron 1	within gene	chr7	21999666	8	OPPOSITE
1aC_NlaIII_SBONC6	lmo1	5 prime	55.247 kb	chr7	28441538	8	SAME
1aC_NlaIII_SBONC6	LOC566888	intron 1	within gene	chr15	32214698	8	OPPOSITE
1aC_NlaIII_SBONC6	ccdc76	exon 11	within gene	chr22	16413486	8	OPPOSITE
1aC_NlaIII_SBONC6	zgc:112435	3 prime	9.750 kb	chr6	61076596	7	SAME
1aC_NlaIII_SBONC6	icn2	intron 1	within gene	chr16	22005797	7	OPPOSITE
1aC_NlaIII_SBONC6	bactin2	exon 6	within gene	chr3	37649776	7	SAME
1aC_NlaIII_SBONC6	zdhhc24	3 prime	25.219 kb	chr14	35317541	7	SAME
1aC_NlaIII_SBONC6				chr16	34381058	7
1aC_NlaIII_SBONC6	cadm1b	3 prime	52.679 kb	chr15	18910937	6	OPPOSITE
1aC_NlaIII_SBONC6	mdm4	5 prime	40.470 kb	chr11	21191870	6	SAME
1aC_NlaIII_SBONC6	zgc:77049	3 prime	29.846 kb	chr14	47312131	6	OPPOSITE
1aC_NlaIII_SBONC6	zgc:171664	3 prime	31.856 kb	chr12	46111254	6	SAME
1aC_NlaIII_SBONC6	dtx1	3 prime	122.318 kb	chr7	17946488	6	SAME
1aC_NlaIII_SBONC6	hs3st2	5 prime	114.861 kb	chr3	41938922	6	SAME
1aC_NlaIII_SBONC6				chr16	46369786	6
1aC_NlaIII_SBONC6	bactin2	5 prime	0.027 kb	chr3	37652969	6	SAME
1aC_NlaIII_SBONC6	cenpp	intron 6	within gene	chr22	12729667	6	OPPOSITE
1aC_NlaIII_SBONC6	sema3e	3 prime	12.342 kb	chr18	9705842	6	SAME
1aC_NlaIII_SBONC6	wu:fb11h05	3 prime	55.395 kb	chr4	34193264	6	OPPOSITE
1aC_NlaIII_SBONC6				chr11	32282907	5
1aC_NlaIII_SBONC6	ankrd29	5 prime	18.878 kb	chr22	16557740	5	OPPOSITE
1aC_NlaIII_SBONC6	src	intron 1	within gene	chr23	36912359	5	SAME
1aC_NlaIII_SBONC6	nadsyn1	3 prime	89.222 kb	chr7	68895113	5	OPPOSITE
1aC_NlaIII_SBONC6	nrg1	5 prime	192.028 kb	chr9	773668	5	OPPOSITE
1aC_NlaIII_SBONC6	si:ch211-113p18.5	3 prime	54.709 kb	chr15	12175741	5	SAME
1aC_NlaIII_SBONC6				chr12	40072282	5
1aC_NlaIII_SBONC6	zgc:85812	3 prime	36.457 kb	chr3	20029612	5	SAME
1aC_NlaIII_SBONC6	hmgcrb	3 prime	60.617 kb	chr21	2883883	5	OPPOSITE
1aC_NlaIII_SBONC6	zgc:158652	5 prime	73.542 kb	chr10	15162036	5	OPPOSITE
1aC_NlaIII_SBONC6	ncs1a	5 prime	8.788 kb	chr5	30525538	5	SAME
1aC_NlaIII_SBONC6	LOC560360	intron 1	within gene	chr24	15838067	5	OPPOSITE
1aC_NlaIII_SBONC6	zgc:173962	intron 2	within gene	chr2	11669130	5	OPPOSITE
1aC_NlaIII_SBONC6	sgsm3	5 prime	82.595 kb	chr3	30879102	5	OPPOSITE
1aC_NlaIII_SBONC6	cog3	intron 1	within gene	chr9	51755172	5	SAME
1aC_NlaIII_SBONC6				chr15	42771533	5
1aC_NlaIII_SBONC6	zgc:110692	exon 9	within gene	chr15	71005	5	OPPOSITE
1aC_NlaIII_SBONC6	zic6	3 prime	96.453 kb	chr14	33396122	5	OPPOSITE
1aC_NlaIII_SBONC6	zgc:56702	3 prime	134.826 kb	chr10	12945561	5	SAME
1aC_NlaIII_SBONC6	mgat4b	intron 12	within gene	chr14	15180245	5	SAME
1aC_NlaIII_SBONC6				chr16	24549870	5
1aC_NlaIII_SBONC6	zgc:158270	3 prime	13.593 kb	chr11	43607326	5	OPPOSITE
1aC_NlaIII_SBONC6				chr20	10672273	5
1aC_NlaIII_SBONC6	polr3e	5 prime	23.687 kb	chr12	477549	5	OPPOSITE
1aC_NlaIII_SBONC6	zgc:110692	exon 9	within gene	chr15	71003	5	OPPOSITE
1aC_NlaIII_SBONC6	asb12b	3 prime	21.837 kb	chr14	9933795	5	OPPOSITE
1aC_NlaIII_SBONC6	rps9	5 prime	34.879 kb	chr16	44373592	5	SAME
1aC_NlaIII_SBONC6				chr6	60407293	5
1aC_NlaIII_SBONC6	dpy19l1l	5 prime	24.889 kb	chr16	42088925	5	OPPOSITE
1aC_NlaIII_SBONC6				chr22	32004501	4
1aC_NlaIII_SBONC6	zgc:112175	exon 5	within gene	chr23	3263742	4	OPPOSITE
1aC_NlaIII_SBONC6	si:ch211-117n7.7	5 prime	51.039 kb	chr13	9573943	4	SAME
1aC_NlaIII_SBONC6	LOC798574	5 prime	2.888 kb	chr6	53516118	4	SAME
1aC_NlaIII_SBONC6	lepr	3 prime	42.943 kb	chr6	32997823	4	SAME
1aC_NlaIII_SBONC6	bnip3l2	intron 4	within gene	chr8	5355902	4	SAME
1aC_NlaIII_SBONC6	glb1l	5 prime	28.734 kb	chr9	12392468	4	OPPOSITE
1aC_NlaIII_SBONC6				chr10	16366012	4
1aC_NlaIII_SBONC6	ext1a	3 prime	3.763 kb	chr16	44298325	4	SAME
1aC_NlaIII_SBONC6	zgc:77449	exon 3	within gene	chr10	2607453	4	SAME
1aC_NlaIII_SBONC6	ncapd2	intron 3	within gene	chr2	43833911	4	OPPOSITE
1aC_NlaIII_SBONC6	slc9a5	5 prime	53.990 kb	chr7	34936911	4	OPPOSITE
1aC_NlaIII_SBONC6	zgc:171453	5 prime	48.199 kb	chr23	20559863	4	SAME
1aC_NlaIII_SBONC6	zgc:158807	3 prime	3.152 kb	chr2	54435988	4	SAME
1aC_NlaIII_SBONC6	zgc:66450	5 prime	9.721 kb	chr7	72939106	4	SAME
1aC_NlaIII_SBONC6	slc39a7	3 prime	0.047 kb	chr19	13129562	4	OPPOSITE
1aC_NlaIII_SBONC6	stat6	5 prime	26.481 kb	chr23	26593846	4	SAME
1aC_NlaIII_SBONC6	zgc:172238	intron 4	within gene	chr3	209071	4	OPPOSITE
1aC_NlaIII_SBONC6				chr12	40867703	4
1aC_NlaIII_SBONC6	zgc:77086	5 prime	32.869 kb	chr16	29234429	4	OPPOSITE
1aC_NlaIII_SBONC6	dnajc24	3 prime	77.385 kb	chr25	16516354	4	OPPOSITE
1aC_NlaIII_SBONC6	jmjd6	3 prime	90.479 kb	chr3	58369406	4	OPPOSITE
1aC_NlaIII_SBONC6	crfb8	intron 3	within gene	chr20	2409316	4	SAME
1aC_NlaIII_SBONC6	spoplb	5 prime	77.575 kb	chr11	33894814	4	OPPOSITE
1aC_NlaIII_SBONC6				chr7	46899379	4
1aC_NlaIII_SBONC6	pdlim5	intron 6	within gene	chr5	6373257	4	SAME
1aC_NlaIII_SBONC6	unc5c	intron 1	within gene	chr10	440709	4	OPPOSITE
1aC_NlaIII_SBONC6	zgc:172131	3 prime	91.950 kb	chr10	38935686	4	SAME
1aC_NlaIII_SBONC6	zgc:63599	5 prime	2.529 kb	chr7	71016813	4	SAME
1aC_NlaIII_SBONC6				chr16	2406283	4
1aC_NlaIII_SBONC6	zgc:153499	3 prime	80.628 kb	chr9	7460821	4	SAME
1aC_NlaIII_SBONC6	pcsk1nl	5 prime	46.531 kb	chr8	6027919	4	SAME
1aC_NlaIII_SBONC6				chr11	9601350	4
1aC_NlaIII_SBONC6	LOC100003983	5 prime	26.472 kb	chr2	52232540	4	OPPOSITE
1aC_NlaIII_SBONC6	pbx4	intron 2	within gene	chr3	50509266	4	SAME
1aC_NlaIII_SBONC6	fam46bb	3 prime	24.215 kb	chr19	16901409	4	SAME
1aC_NlaIII_SBONC6	zgc:91930	3 prime	4.457 kb	chr5	73996273	4	OPPOSITE
1aC_NlaIII_SBONC6	sgce	intron 8	within gene	chr19	39573462	4	OPPOSITE
1aC_NlaIII_SBONC6				chr19	14884946	4
1aC_NlaIII_SBONC6	zgc:171601	3 prime	22.873 kb	chr22	5791996	4	SAME
1aC_NlaIII_SBONC6	rtn1b	intron 1	within gene	chr20	19871660	4	OPPOSITE
1aC_NlaIII_SBONC6				chr2	45259214	4
1aC_NlaIII_SBONC6	zgc:172136	exon 14	within gene	chr13	39974888	4	OPPOSITE
1aC_NlaIII_SBONC6	zgc:153976	3 prime	73.962 kb	chr11	40405963	3	SAME
1aC_NlaIII_SBONC6	zgc:66472	5 prime	81.687 kb	chr1	46151784	3	OPPOSITE
1aC_NlaIII_SBONC6	rfx1a	intron 15	within gene	chr3	15461481	3	OPPOSITE
1aC_NlaIII_SBONC6	zgc:92789	intron 2	within gene	chr2	57466475	3	SAME
1aC_NlaIII_SBONC6	sord	5 prime	104.438 kb	chr2	18980916	3	OPPOSITE
1aC_NlaIII_SBONC6	LOC100001681	3 prime	83.667 kb	chr8	9841520	3	SAME
1aC_NlaIII_SBONC6	zgc:158381	5 prime	178.192 kb	chr6	29095066	3	OPPOSITE
1aC_NlaIII_SBONC6	vim	intron 7	within gene	chr24	32639458	3	SAME
1aC_NlaIII_SBONC6				chr16	20567988	3
1aC_NlaIII_SBONC6	sh3gl1a	5 prime	132.494 kb	chr2	50080882	3	OPPOSITE
1aC_NlaIII_SBONC6	zgc:110692	exon 9	within gene	chr15	70636	3	OPPOSITE
1aC_NlaIII_SBONC6				chr18	11479758	3
1aC_NlaIII_SBONC6	fam46bb	3 prime	24.217 kb	chr19	16901407	3	SAME
1aC_NlaIII_SBONC6	npm3	3 prime	0.378 kb	chr13	12173815	3	OPPOSITE
1aC_NlaIII_SBONC6	stat4	intron 12	within gene	chr9	41451838	3	OPPOSITE
1aC_NlaIII_SBONC6	zgc:152651	5 prime	54.392 kb	chr7	53706966	3	SAME
1aC_NlaIII_SBONC6	zgc:63695	intron 2	within gene	chr20	30948296	3	OPPOSITE
1aC_NlaIII_SBONC6	zgc:171226	5 prime	69.364 kb	chr11	11939984	3	OPPOSITE
1aC_NlaIII_SBONC6	dnmt6	5 prime	20.561 kb	chr17	34780296	3	OPPOSITE
1aC_NlaIII_SBONC6	si:ch211-138a11.5	intron 4	within gene	chr7	26232564	3	SAME
1aC_NlaIII_SBONC6	LOC561647	3 prime	89.773 kb	chr17	34450103	3	OPPOSITE
1aC_NlaIII_SBONC6	snx2	intron 2	within gene	chr8	871757	3	SAME
1aC_NlaIII_SBONC6				chr1	15033727	3
1aC_NlaIII_SBONC6	zfpm2b	5 prime	155.443 kb	chr19	45842222	3	SAME
1aC_NlaIII_SBONC6				chr19	46839358	3
1aC_NlaIII_SBONC6	si:dkeyp-84g1.1	5 prime	17.733 kb	chr18	24408143	3	OPPOSITE
1aC_NlaIII_SBONC6	k2p10.1	5 prime	122.496 kb	chr17	908632	3	OPPOSITE
1aC_NlaIII_SBONC6	fcer1gl	3 prime	12.617 kb	chr2	57149295	3	OPPOSITE
1aC_NlaIII_SBONC6				chr12	37570406	3
1aC_NlaIII_SBONC6	wars	3 prime	84.327 kb	chr17	722462	3	OPPOSITE
1aC_NlaIII_SBONC6	zgc:112062	exon 1	within gene	chr14	10933229	3	SAME
1aC_NlaIII_SBONC6	zgc:85882	3 prime	15.958 kb	chr12	43312548	3	SAME
1aC_NlaIII_SBONC6	rap2c	intron 2	within gene	chr14	32249494	3	OPPOSITE
1aC_NlaIII_SBONC6				chr5	70220874	3
1aC_NlaIII_SBONC6	zgc:110234	3 prime	37.320 kb	chr18	44672039	3	OPPOSITE
1aC_NlaIII_SBONC6				chr3	54877668	3
1aC_NlaIII_SBONC6	zgc:158328	intron 5	within gene	chr15	36169404	3	SAME
1aC_NlaIII_SBONC6	gnl3	5 prime	17.903 kb	chr11	3702273	3	OPPOSITE
1aC_NlaIII_SBONC6	prickle2	intron 1	within gene	chr11	18849955	3	SAME
1aC_NlaIII_SBONC6	rap2b	5 prime	38.168 kb	chr18	48963700	3	OPPOSITE
1aC_NlaIII_SBONC6	zgc:110692	exon 9	within gene	chr15	71004	3	OPPOSITE
1aC_NlaIII_SBONC6	zgc:114109	3 prime	40.838 kb	chr3	33829203	3	SAME
1aC_NlaIII_SBONC6	zgc:101585	3 prime	44.604 kb	chr21	3539011	3	OPPOSITE
1aC_NlaIII_SBONC6				chr9	37122730	3
1aC_NlaIII_SBONC6				chr4	34906850	3
1aC_NlaIII_SBONC6	josd2	intron 3	within gene	chr16	12454595	3	SAME
1aC_NlaIII_SBONC6	rsrc2	5 prime	20.887 kb	chr5	69374280	3	OPPOSITE
1aC_NlaIII_SBONC6	fuca2	3 prime	34.095 kb	chr17	6214002	3	OPPOSITE
1aC_NlaIII_SBONC6				chr21	3072138	3
1aC_NlaIII_SBONC6	zgc:153222	3 prime	51.154 kb	chr2	2736982	3	OPPOSITE
1aC_NlaIII_SBONC6				chr25	24305103	3
1aC_NlaIII_SBONC6	ada	intron 8	within gene	chr23	25415406	3	OPPOSITE
1aC_NlaIII_SBONC6				chr7	72216687	3
1aC_NlaIII_SBONC6	il13ra2	5 prime	54.616 kb	chr5	34819661	3	OPPOSITE
1aC_NlaIII_SBONC6				chr2	34254967	3
1aC_NlaIII_SBONC6	slc37a2	5 prime	102.775 kb	chr5	59715178	3	OPPOSITE
1aC_NlaIII_SBONC6	hspb6	3 prime	10.605 kb	chr15	37976977	3	SAME
1aC_NlaIII_SBONC6	cnot8	5 prime	33.632 kb	chr21	38745393	3	OPPOSITE
1aC_NlaIII_SBONC6	serpind1	5 prime	41.500 kb	chr8	2017358	3	SAME
1aC_NlaIII_SBONC6				chr24	3959534	3
1aC_NlaIII_SBONC6	spam1	3 prime	41.039 kb	chr25	28730427	3	SAME
1aC_NlaIII_SBONC6	zgc:103561	3 prime	60.522 kb	chr5	59523138	3	OPPOSITE
1aC_NlaIII_SBONC6	esr2a	3 prime	55.024 kb	chr20	20886185	3	OPPOSITE
1aC_NlaIII_SBONC6				chr7	64273271	3
1aC_NlaIII_SBONC6	zgc:112393	3 prime	31.210 kb	chr1	4026600	3	SAME
1aC_NlaIII_SBONC6				chr11	4291204	3
1aC_NlaIII_SBONC6	cox7a2l	5 prime	10.108 kb	chr12	22708981	3	OPPOSITE
1aC_NlaIII_SBONC6	zgc:136859	intron 1	within gene	chr14	9712660	3	SAME
1aC_NlaIII_SBONC6	eif2ak3	intron 3	within gene	chr13	14036072	3	OPPOSITE
1aC_NlaIII_SBONC6	bactin2	exon 2	within gene	chr3	37651449	3	OPPOSITE
1aC_NlaIII_SBONC6	abcg4b	intron 8	within gene	chr15	23632789	3	SAME
1aC_NlaIII_SBONC6	cyp19a1a	5 prime	0.420 kb	chr18	39147398	3	SAME
1aC_NlaIII_SBONC6				chr16	4070377	3
1aC_NlaIII_SBONC6	neo1	intron 4	within gene	chr7	56220277	3	OPPOSITE
1aC_NlaIII_SBONC6	moxd1	3 prime	13.413 kb	chr20	24922676	3	OPPOSITE
1aC_NlaIII_SBONC6				chr11	6983502	3
1aC_NlaIII_SBONC6	sptb	5 prime	45.517 kb	chr17	36322633	3	OPPOSITE
1aC_NlaIII_SBONC6	tlr2	3 prime	12.700 kb	chr1	7282626	3	OPPOSITE
1aC_NlaIII_SBONC6	usp33	intron 17	within gene	chr2	8065534	3	SAME
1aC_NlaIII_SBONC6				chr15	18090951	3
1aC_NlaIII_SBONC6	zgc:163003	3 prime	11.911 kb	chr7	21810258	3	SAME
1aC_NlaIII_SBONC6	garnl3	intron 2	within gene	chr5	31747700	3	OPPOSITE
1aC_NlaIII_SBONC6				chr19	19754853	3
1aC_NlaIII_SBONC6	klhl24	3 prime	6.157 kb	chr2	43668444	3	OPPOSITE
1aC_NlaIII_SBONC6	zgc:103755	5 prime	31.020 kb	chr17	42921670	3	OPPOSITE
1aC_NlaIII_SBONC6	rac2	3 prime	36.568 kb	chr3	26961441	3	OPPOSITE
1aC_NlaIII_SBONC6				chr13	28270356	2
1aC_NlaIII_SBONC6	lppr3a	3 prime	28.099 kb	chr2	24929555	2	OPPOSITE
1aC_NlaIII_SBONC6	gstp2	5 prime	69.436 kb	chr14	3332089	2	SAME
1aC_NlaIII_SBONC6	etfdh	5 prime	64.931 kb	chr14	48647842	2	SAME
1aC_NlaIII_SBONC6				chr12	19892828	2
1aC_NlaIII_SBONC6				chr7	49664678	2
1aC_NlaIII_SBONC6	trappc3	3 prime	28.041 kb	chr19	34992064	2	SAME
1aC_NlaIII_SBONC6	cfb	intron 6	within gene	chr21	29722248	2	SAME
1aC_NlaIII_SBONC6				chr10	24637186	2
1aC_NlaIII_SBONC6	kctd12.2	5 prime	2.890 kb	chr1	34699379	2	OPPOSITE
1aC_NlaIII_SBONC6	zgc:86905	5 prime	14.083 kb	chr4	5930627	2	OPPOSITE
1aC_NlaIII_SBONC6	si:dkeyp-89d7.2	intron 1	within gene	chr19	37646754	2	SAME
1aC_NlaIII_SBONC6	spred2	intron 1	within gene	chr13	6215645	2	SAME
1aC_NlaIII_SBONC6				chr22	40487526	2
1aC_NlaIII_SBONC6	wnt8a	5 prime	89.526 kb	chr14	36137319	2	SAME
1aC_NlaIII_SBONC6	xkr6	intron 3	within gene	chr20	17960318	2	SAME
1aC_NlaIII_SBONC6	zgc:112435	3 prime	9.748 kb	chr6	61076594	2	SAME
1aC_NlaIII_SBONC6	zgc:153978	3 prime	16.389 kb	chr13	49775908	2	OPPOSITE
1aC_NlaIII_SBONC6	midn	5 prime	6.862 kb	chr22	18910023	2	SAME
1aC_NlaIII_SBONC6	pard6gb	intron 2	within gene	chr19	24571584	2	SAME
1aC_NlaIII_SBONC6				chr23	28646942	2
1aC_NlaIII_SBONC6	zgc:162204	3 prime	39.868 kb	chr12	9730347	2	OPPOSITE
1aC_NlaIII_SBONC6	col18a1	5 prime	80.340 kb	chr9	42154438	2	SAME
1aC_NlaIII_SBONC6	zgc:152658	5 prime	18.571 kb	chr1	39385777	2	SAME
1aC_NlaIII_SBONC6	pif1	3 prime	19.957 kb	chr2	14163962	2	SAME
1aC_NlaIII_SBONC6	ccr6a	intron 15	within gene	chr20	30318635	2	OPPOSITE
1aC_NlaIII_SBONC6	igf2bp2a	intron 2	within gene	chr9	12080689	2	OPPOSITE
1aC_NlaIII_SBONC6	fam46bb	3 prime	24.213 kb	chr19	16901411	2	SAME
1aC_NlaIII_SBONC6	bnip2	5 prime	20.001 kb	chr25	35503608	2	SAME
1aC_NlaIII_SBONC6	ext1a	intron 2	within gene	chr16	44285689	2	OPPOSITE
1aC_NlaIII_SBONC6	jmjd6	5 prime	3.941 kb	chr3	58463826	2	SAME
1aC_NlaIII_SBONC6	erbb2	5 prime	10.260 kb	chr12	9823029	2	OPPOSITE
1aC_NlaIII_SBONC6	il6st	5 prime	41.987 kb	chr10	6751712	2	SAME
1aC_NlaIII_SBONC6	si:dkey-151g22.1	3 prime	15.364 kb	chr5	53761671	2	OPPOSITE
1aC_NlaIII_SBONC6	erlin2	3 prime	10.107 kb	chr5	33924692	2	OPPOSITE
1aC_NlaIII_SBONC6	slc6a4a	3 prime	23.841 kb	chr15	29121889	2	SAME
1aC_NlaIII_SBONC6				chr22	28159348	2
1aC_NlaIII_SBONC6	si:dkey-119f1.1	intron 2	within gene	chr2	5175899	2	OPPOSITE
1aC_NlaIII_SBONC6	bactin2	intron 1	within gene	chr3	37652378	2	OPPOSITE
1aC_NlaIII_SBONC6				chr6	41521723	2
1aC_NlaIII_SBONC6	hnrnph1	3 prime	76.274 kb	chr14	6580287	2	OPPOSITE
1aC_NlaIII_SBONC6	aldh2b	intron 7	within gene	chr5	71649348	2	OPPOSITE
1aC_NlaIII_SBONC6				chr16	47079903	2
1aC_NlaIII_SBONC6	nsfb	5 prime	21.470 kb	chr12	26316705	2	SAME
1aC_NlaIII_SBONC6				chr10	15558785	2
1aC_NlaIII_SBONC6	LOC100002237	5 prime	71.238 kb	chr5	31926581	2	SAME
1aC_NlaIII_SBONC6				chr25	10138998	2
1aC_NlaIII_SBONC6	mir430a-23	5 prime	9.057 kb	chr4	34388308	2	SAME
1aC_NlaIII_SBONC6	fstb	5 prime	67.883 kb	chr10	8298071	2	OPPOSITE
1aC_NlaIII_SBONC6	zgc:63934	intron 1	within gene	chr12	2760934	2	OPPOSITE
1aC_NlaIII_SBONC6				chr8	15707096	2
1aC_NlaIII_SBONC6	si:dkey-208k4.2	5 prime	84.487 kb	chr19	12621370	2	OPPOSITE
1aC_NlaIII_SBONC6	ascl1b	3 prime	10.291 kb	chr7	50371248	2	OPPOSITE
1aC_NlaIII_SBONC6	LOC562468	3 prime	3.691 kb	chr5	19146549	2	SAME
1aC_NlaIII_SBONC6	si:rp71-56i13.6	intron 5	within gene	chr10	27978549	2	OPPOSITE
1aC_NlaIII_SBONC6	bfb	5 prime	4.612 kb	chr21	29752892	2	OPPOSITE
1aC_NlaIII_SBONC6	zgc:112202	5 prime	19.896 kb	chr4	8777867	2	SAME
1aC_NlaIII_SBONC6	esrrg	intron 4	within gene	chr17	27491620	2	SAME
1aC_NlaIII_SBONC6	raly	intron 1	within gene	chr6	53602697	2	OPPOSITE
1aC_NlaIII_SBONC6	rgp1	intron 8	within gene	chr7	24697013	2	SAME
1aC_NlaIII_SBONC6	ablim1b	intron 3	within gene	chr12	25817409	2	OPPOSITE
1aC_NlaIII_SBONC6	xpa	intron 8	within gene	chr1	10882132	2	SAME
1aC_NlaIII_SBONC6	hspa14	intron 9	within gene	chr4	9247000	2	OPPOSITE
1aC_NlaIII_SBONC6	zgc:153997	5 prime	67.453 kb	chr8	9993824	2	SAME
1aC_NlaIII_SBONC6	zgc:66160	3 prime	100.370 kb	chr3	24883727	2	SAME
1aC_NlaIII_SBONC6	zgc:112361	3 prime	100.973 kb	chr8	18497112	2	OPPOSITE
1aC_NlaIII_SBONC6	phox2b	5 prime	13.868 kb	chr14	18874316	2	OPPOSITE
1aC_NlaIII_SBONC6	mtr	intron 24	within gene	chr12	45050181	2	SAME
1aC_NlaIII_SBONC6	stc2	5 prime	15.354 kb	chr14	25565639	2	SAME
1aC_NlaIII_SBONC6	cyc1	5 prime	51.087 kb	chr6	54683994	2	SAME
1aC_NlaIII_SBONC6	wdr8	intron 11	within gene	chr8	49967759	2	SAME
1aC_NlaIII_SBONC6				chr3	18446550	2
1aC_NlaIII_SBONC6	zgc:136652	5 prime	24.315 kb	chr1	20099191	2	OPPOSITE
1aC_NlaIII_SBONC6	tnfrsf21	3 prime	98.713 kb	chr20	35641183	2	SAME
1aC_NlaIII_SBONC6	LOC100003386	5 prime	58.517 kb	chr8	28256652	2	OPPOSITE
1aC_NlaIII_SBONC6	im:7143992	3 prime	79.492 kb	chr16	5663022	2	SAME
1aC_NlaIII_SBONC6	coe2	intron 6	within gene	chr5	69250509	2	SAME
1aC_NlaIII_SBONC6	eef1b2	3 prime	34.542 kb	chr6	14381740	2	SAME
1aC_NlaIII_SBONC6	rasl11b	5 prime	22.271 kb	chr20	22300332	2	SAME
1aC_NlaIII_SBONC6	aicda	5 prime	85.042 kb	chr16	11326501	2	SAME
1aC_NlaIII_SBONC6				chr5	4339854	2
1aC_NlaIII_SBONC6				chr22	8754708	2
1aC_NlaIII_SBONC6	crfb8	intron 1	within gene	chr20	2414982	2	SAME
1aC_NlaIII_SBONC6	zgc:162740	intron 2	within gene	chr25	567577	2	OPPOSITE
1aC_NlaIII_SBONC6	pbx2	5 prime	39.281 kb	chr16	46664812	2	OPPOSITE
1aC_NlaIII_SBONC6	zgc:64133	5 prime	48.834 kb	chr10	31056116	2	OPPOSITE
1aC_NlaIII_SBONC6	pmpcb	intron 7	within gene	chr4	2268912	2	OPPOSITE
1aC_NlaIII_SBONC6	gbx2	3 prime	28.121 kb	chr6	17439711	2	OPPOSITE
1aC_NlaIII_SBONC6	pparab	5 prime	88.129 kb	chr25	1999954	2	OPPOSITE
1aC_NlaIII_SBONC6	zgc:153218	3 prime	99.427 kb	chr15	10621673	2	SAME
1aC_NlaIII_SBONC6	ptpn12	3 prime	69.644 kb	chr4	393522	2	OPPOSITE
1aC_NlaIII_SBONC6	rgl2	5 prime	92.174 kb	chr16	44596034	2	SAME
1aC_NlaIII_SBONC6				chr6	57200957	2
1aC_NlaIII_SBONC6	zgc:101761	intron 5	within gene	chr2	51387720	2	SAME
1aC_NlaIII_SBONC6	hs6st1b	5 prime	64.568 kb	chr24	29258884	2	SAME
1aC_NlaIII_SBONC6	zgc:175142	intron 13	within gene	chr21	42328910	2	OPPOSITE
1aC_NlaIII_SBONC6	sft2d3	5 prime	46.553 kb	chr2	4131251	2	SAME
1aC_NlaIII_SBONC6	cdh18	intron 1	within gene	chr2	27217599	2	OPPOSITE
1aC_NlaIII_SBONC6	mkxa	intron 5	within gene	chr12	26956712	2	OPPOSITE
1aC_NlaIII_SBONC6	he1a	5 prime	25.395 kb	chr22	14365347	2	OPPOSITE
1aC_NlaIII_SBONC6				chr4	7739911	2
1aC_NlaIII_SBONC6	tmem8c	5 prime	41.343 kb	chr5	67638644	2	OPPOSITE
1aC_NlaIII_SBONC6	scn1lab	5 prime	12.807 kb	chr6	11276809	2	SAME
1aC_NlaIII_SBONC6	pts	5 prime	22.381 kb	chr12	1153046	2	SAME
1aC_NlaIII_SBONC6	tnfsf10l3	3 prime	48.366 kb	chr21	33418336	2	SAME
1aC_NlaIII_SBONC6	sepw1	3 prime	96.950 kb	chr5	63427127	2	OPPOSITE
1aC_NlaIII_SBONC6	ablim1a	intron 17	within gene	chr13	44060708	2	OPPOSITE
1aC_NlaIII_SBONC6				chr7	68946254	2
1aC_NlaIII_SBONC6				chr6	34791958	2
1aC_NlaIII_SBONC6	si:dkeyp-86e4.1	3 prime	17.850 kb	chr18	35895152	2	SAME
1aC_NlaIII_SBONC6	zgc:77304	5 prime	75.869 kb	chr18	46660595	2	SAME
1aC_NlaIII_SBONC6	gsx1	5 prime	21.105 kb	chr5	72178219	2	OPPOSITE
1aC_NlaIII_SBONC6	zgc:153978	3 prime	16.216 kb	chr13	49775735	2	OPPOSITE
1aC_NlaIII_SBONC6	zgc:110063	3 prime	29.656 kb	chr5	9133470	2	OPPOSITE
1aC_NlaIII_SBONC6	glb1	intron 10	within gene	chr1	56007848	2	OPPOSITE
1aC_NlaIII_SBONC6	esr2a	5 prime	69.429 kb	chr20	20761732	2	OPPOSITE
1aC_NlaIII_SBONC6	met	3 prime	32.271 kb	chr25	19344979	2	SAME
1aC_NlaIII_SBONC6	lepr	3 prime	75.943 kb	chr6	32964823	2	OPPOSITE
1aC_NlaIII_SBONC6	zgc:113184	intron 4	within gene	chr11	3015960	2	SAME
1aC_NlaIII_SBONC6				chr22	770908	2
1aC_NlaIII_SBONC6	rarga	5 prime	8.416 kb	chr23	35320087	2	SAME
1aC_NlaIII_SBONC6				chr14	42203345	2
1aC_NlaIII_SBONC6	sox1b	5 prime	48.501 kb	chr1	46287722	2	SAME
1aC_NlaIII_SBONC6	ptgs1	intron 4	within gene	chr5	67057507	2	OPPOSITE
1aC_NlaIII_SBONC6	tfap2b	3 prime	48.303 kb	chr20	46646154	2	OPPOSITE
1aC_NlaIII_SBONC6	syt5a	intron 1	within gene	chr3	29400222	2	SAME
1aC_NlaIII_SBONC6	syt9b	intron 6	within gene	chr25	15398140	2	SAME
1aC_NlaIII_SBONC6	tas2r3	3 prime	43.787 kb	chr9	39558877	2	SAME
1aC_NlaIII_SBONC6	si:dkeyp-73a2.2	5 prime	6.619 kb	chr23	5887687	2	SAME
1aC_NlaIII_SBONC6				chr7	42317827	2
1aC_NlaIII_SBONC6	si:ch73-250d21.1	5 prime	18.264 kb	chr8	7198869	2	SAME
1aC_NlaIII_SBONC6	jmjd7	intron 6	within gene	chr17	8772056	2	OPPOSITE
1aC_NlaIII_SBONC6				chr15	39486088	2
1aC_NlaIII_SBONC6	tslpr	5 prime	14.345 kb	chr9	35173044	2	SAME
1aC_NlaIII_SBONC6				chr14	42298431	2
1aC_NlaIII_SBONC6				chr20	17079951	2
1aC_NlaIII_SBONC6	tnni1b	5 prime	84.816 kb	chr6	58486661	2	SAME
1aC_NlaIII_SBONC6	tmem176l.4	5 prime	2.757 kb	chr16	46042243	2	SAME
1aC_NlaIII_SBONC6	zgc:85696	intron 4	within gene	chr13	50235481	2	OPPOSITE
1aC_NlaIII_SBONC6	fgfr1op2	3 prime	8.147 kb	chr4	2241539	2	OPPOSITE
1aC_NlaIII_SBONC6	cdk9	intron 2	within gene	chr21	5665369	2	OPPOSITE
1aC_NlaIII_SBONC6	ppp2r3c	intron 9	within gene	chr17	11165344	2	SAME
1aC_NlaIII_SBONC6	h1m	5 prime	27.391 kb	chr5	72498481	2	OPPOSITE
1aC_NlaIII_SBONC6				chr14	42538477	2
1aC_NlaIII_SBONC6	runx3	exon 6	within gene	chr13	45530430	2	OPPOSITE
1aC_NlaIII_SBONC6	gpsm2	5 prime	63.168 kb	chr2	44541318	2	OPPOSITE
1aC_NlaIII_SBONC6	zgc:158220	intron 2	within gene	chr3	9730150	2	OPPOSITE
1aC_NlaIII_SBONC6	zgc:55363	5 prime	4.210 kb	chr15	20587225	2	OPPOSITE
1aC_NlaIII_SBONC6	jph1a	intron 2	within gene	chr24	13478427	2	SAME
1aC_NlaIII_SBONC6	nrg2b	3 prime	3.946 kb	chr14	8774604	2	SAME
1aC_NlaIII_SBONC6	glrbb	5 prime	119.722 kb	chr14	37075799	2	OPPOSITE
1aC_NlaIII_SBONC6	usp25	3 prime	78.907 kb	chr10	36506588	2	OPPOSITE
1aC_NlaIII_SBONC6	ext1a	3 prime	7.627 kb	chr16	44302189	2	SAME
1aC_NlaIII_SBONC6				chr21	11504963	2
1aC_NlaIII_SBONC6	rpz2	intron 1	within gene	chr16	45661051	2	SAME
1aC_NlaIII_SBONC6	klf15	3 prime	52.109 kb	chr23	33991152	2	OPPOSITE
1aC_NlaIII_SBONC6	vamp3	5 prime	49.894 kb	chr11	40355880	2	OPPOSITE
1aC_NlaIII_SBONC6	slc9a5	intron 1	within gene	chr7	34964244	2	OPPOSITE
1aC_NlaIII_SBONC6	pard3	intron 4	within gene	chr2	42346825	2	SAME
1aC_NlaIII_SBONC6				chr11	9155381	2
1aC_NlaIII_SBONC6	zgc:152897	intron 2	within gene	chr5	39883104	2	SAME
1aC_NlaIII_SBONC6				chr1	26856629	2
1aC_NlaIII_SBONC6	gpr74	3 prime	51.127 kb	chr5	14704901	2	OPPOSITE
1aC_NlaIII_SBONC6	zgc:153539	intron 2	within gene	chr5	31958161	2	OPPOSITE
1aC_NlaIII_SBONC6	zgc:103514	3 prime	10.269 kb	chr19	23904782	2	SAME
1aC_NlaIII_SBONC6	col9a2	3 prime	26.832 kb	chr19	37733856	2	SAME
1aC_NlaIII_SBONC6	dpp6	intron 26	within gene	chr2	13096766	2	SAME
1aC_NlaIII_SBONC6	zgc:174275	3 prime	63.507 kb	chr4	57254189	2	OPPOSITE
1aC_NlaIII_SBONC6	lgi3	5 prime	0.916 kb	chr8	52343446	2	SAME
1aC_NlaIII_SBONC6	zgc:171356	intron 9	within gene	chr13	34184464	2	OPPOSITE
1aC_NlaIII_SBONC6	pdlim4	intron 1	within gene	chr21	44567966	2	OPPOSITE
1aC_NlaIII_SBONC6	zgc:154067	intron 3	within gene	chr11	543548	2	SAME
1aC_NlaIII_SBONC6				chr16	24549870	2
1aC_NlaIII_SBONC6				chr16	19258441	2
1aC_NlaIII_SBONC6	gspt1	3 prime	31.787 kb	chr12	18394294	2	SAME
1aC_NlaIII_SBONC6	zgc:123047	3 prime	51.122 kb	chr21	29112980	2	SAME
1aC_NlaIII_SBONC6	si:ch211-240j18.3	intron 10	within gene	chr5	9527474	2	OPPOSITE
1aC_NlaIII_SBONC6	thoc7	intron 3	within gene	chr11	19051773	2	SAME
1aC_NlaIII_SBONC6				chr14	29269562	2
1aC_NlaIII_SBONC6				chr16	33511967	2
1aC_NlaIII_SBONC6	abi1a	intron 1	within gene	chr24	5876435	2	SAME
1aC_NlaIII_SBONC6	tmem59l	3 prime	50.601 kb	chr22	22158988	2	OPPOSITE
1aC_NlaIII_SBONC6	snx18b	5 prime	19.121 kb	chr10	8468864	2	SAME
1aC_NlaIII_SBONC6	ecsit	5 prime	41.350 kb	chr7	17184014	2	SAME
1aC_NlaIII_SBONC6				chr9	8359561	2
1aC_NlaIII_SBONC6	gyltl1b	5 prime	47.389 kb	chr18	45931249	2	OPPOSITE
1aC_NlaIII_SBONC6	bmpr2b	intron 1	within gene	chr9	12531515	2	OPPOSITE
1aC_NlaIII_SBONC6	slit1b	5 prime	0.147 kb	chr22	36364863	2	SAME
1aC_NlaIII_SBONC6	agpat2	5 prime	2.431 kb	chr11	30066998	2	OPPOSITE
1aC_NlaIII_SBONC6	trpn1	3 prime	120.536 kb	chr19	1382033	2	OPPOSITE
1aC_NlaIII_SBONC6				chr25	3966492	2
1aC_NlaIII_SBONC6	erlin2	3 prime	10.110 kb	chr5	33924695	2	OPPOSITE
1aC_NlaIII_SBONC6				chr5	45779540	2
1aC_NlaIII_SBONC6				chr6	20841850	2
1aC_NlaIII_SBONC6	kcnq3	exon 11	within gene	chr2	42100789	2	OPPOSITE
1aC_NlaIII_SBONC6				chr23	10558583	2
1aC_NlaIII_SBONC6	si:ch211-246f9.1	5 prime	98.495 kb	chr19	44783894	2	SAME
1aC_NlaIII_SBONC6	hsp47	5 prime	24.094 kb	chr15	29945453	2	OPPOSITE
1aC_NlaIII_SBONC6	faf1	intron 7	within gene	chr8	16560025	2	SAME
1aC_NlaIII_SBONC6				chr17	40324321	2
1aC_NlaIII_SBONC6	zgc:112435	3 prime	9.747 kb	chr6	61076593	2	SAME
1aC_NlaIII_SBONC6	zgc:136844	5 prime	13.760 kb	chr18	48269409	2	SAME
1aC_NlaIII_SBONC6	tnrc5	5 prime	24.648 kb	chr1	9150555	2	OPPOSITE
1aC_NlaIII_SBONC6	zgc:172265	intron 12	within gene	chr16	27137846	2	SAME
1aC_NlaIII_SBONC6				chr14	51802090	2
1aC_NlaIII_SBONC6	foxb1.2	3 prime	64.005 kb	chr25	35331447	2	SAME
1aC_NlaIII_SBONC6	il12ba	3 prime	69.866 kb	chr14	36481501	2	OPPOSITE
1aC_NlaIII_SBONC6	zgc:110105	3 prime	70.883 kb	chr13	46018823	2	OPPOSITE
1aC_NlaIII_SBONC6				chr9	1102479	2
1aC_NlaIII_SBONC6	tcp1	3 prime	5.552 kb	chr23	1634396	1	OPPOSITE
1aC_NlaIII_SBONC6	bcam	intron 1	within gene	chr16	22649898	1	OPPOSITE
1aC_NlaIII_SBONC6	zgc:171223	exon 2	within gene	chr14	40686908	1	SAME
1aC_NlaIII_SBONC6				chr11	9160388	1
1aC_NlaIII_SBONC6	zgc:112421	3 prime	1.187 kb	chr2	9199835	1	OPPOSITE
1aC_NlaIII_SBONC6	zgc:153639	5 prime	28.438 kb	chr24	19625498	1	OPPOSITE
1aC_NlaIII_SBONC6	zgc:110112	3 prime	92.890 kb	chr5	12090662	1	OPPOSITE
1aC_NlaIII_SBONC6	lnx1	intron 6	within gene	chr20	21976218	1	SAME
1aC_NlaIII_SBONC6	zgc:113828	3 prime	25.291 kb	chr5	26953178	1	OPPOSITE
1aC_NlaIII_SBONC6	nr5a1a	3 prime	12.766 kb	chr8	55274111	1	OPPOSITE
1aC_NlaIII_SBONC6	rars	intron 2	within gene	chr21	37364015	1	SAME
1aC_NlaIII_SBONC6	gpd1a	3 prime	22.672 kb	chr8	6939756	1	SAME
1aC_NlaIII_SBONC6	si:rp71-84d19.3	5 prime	8.089 kb	chr9	27126054	1	OPPOSITE
1aC_NlaIII_SBONC6	tspan12	intron 4	within gene	chr4	10191362	1	SAME
1aC_NlaIII_SBONC6	pdcd4b	5 prime	72.748 kb	chr22	32299473	1	OPPOSITE
1aC_NlaIII_SBONC6	axin1	intron 2	within gene	chr3	40135716	1	SAME
1aC_NlaIII_SBONC6	palm	3 prime	27.069 kb	chr11	13339353	1	SAME
1aC_NlaIII_SBONC6	txlna	5 prime	62.434 kb	chr19	28853812	1	SAME
1aC_NlaIII_SBONC6	gng5	5 prime	52.272 kb	chr2	5000055	1	OPPOSITE
1aC_NlaIII_SBONC6	zgc:136377	intron 2	within gene	chr5	61620271	1	SAME
1aC_NlaIII_SBONC6	rdh1	intron 2	within gene	chr9	51146342	1	OPPOSITE
1aC_NlaIII_SBONC6	dlg4	3 prime	73.904 kb	chr3	55680287	1	OPPOSITE
1aC_NlaIII_SBONC6	cdc34a	intron 1	within gene	chr22	23340276	1	SAME
1aC_NlaIII_SBONC6	itih3	intron 21	within gene	chr11	37334334	1	SAME
1aC_NlaIII_SBONC6	bmp7b	3 prime	1.391 kb	chr23	4834642	1	SAME
1aC_NlaIII_SBONC6	si:ch211-39h10.1	5 prime	32.521 kb	chr9	33345858	1	OPPOSITE
1aC_NlaIII_SBONC6	zgc:77449	5 prime	28.946 kb	chr10	2638970	1	OPPOSITE
1aC_NlaIII_SBONC6	calca	intron 2	within gene	chr7	27786601	1	SAME
1aC_NlaIII_SBONC6				chr10	11755892	1
1aC_NlaIII_SBONC6	tsc22d1	5 prime	64.923 kb	chr9	18093684	1	SAME
1aC_NlaIII_SBONC6				chr16	20066369	1
1aC_NlaIII_SBONC6	zgc:56049	5 prime	64.902 kb	chr7	17486286	1	OPPOSITE
1aC_NlaIII_SBONC6	vasp	intron 3	within gene	chr18	40272551	1	SAME
1aC_NlaIII_SBONC6				chr24	18504705	1
1aC_NlaIII_SBONC6	camk2g1	5 prime	41.064 kb	chr12	34416431	1	SAME
1aC_NlaIII_SBONC6				chr14	46991538	1
1aC_NlaIII_SBONC6				chr17	16286192	1
1aC_NlaIII_SBONC6				chr14	27866283	1
1aC_NlaIII_SBONC6				chr9	52168253	1
1aC_NlaIII_SBONC6	casc1	5 prime	25.204 kb	chr4	17039859	1	OPPOSITE
1aC_NlaIII_SBONC6	si:dkey-255n2.1	intron 1	within gene	chr19	31951501	1	SAME
1aC_NlaIII_SBONC6	fads2	5 prime	85.616 kb	chr25	3363991	1	SAME
1aC_NlaIII_SBONC6	ralgps1	intron 8	within gene	chr8	33821748	1	SAME
1aC_NlaIII_SBONC6	zgc:110234	3 prime	48.948 kb	chr18	44683667	1	OPPOSITE
1aC_NlaIII_SBONC6	zeb2a	intron 2	within gene	chr9	25235736	1	SAME
1aC_NlaIII_SBONC6				chr21	13156499	1
1aC_NlaIII_SBONC6	fbxl2	5 prime	32.156 kb	chr19	42008845	1	SAME
1aC_NlaIII_SBONC6	zgc:154176	3 prime	18.638 kb	chr22	115748	1	OPPOSITE
1aC_NlaIII_SBONC6	zgc:91984	intron 1	within gene	chr3	53853777	1	SAME
1aC_NlaIII_SBONC6				chr21	2935501	1
1aC_NlaIII_SBONC6				chr15	45603831	1
1aC_NlaIII_SBONC6	shox	3 prime	17.374 kb	chr9	34981353	1	OPPOSITE
1aC_NlaIII_SBONC6	zgc:174275	3 prime	63.510 kb	chr4	57254192	1	OPPOSITE
1aC_NlaIII_SBONC6	LOC559167	3 prime	8.267 kb	chr7	40061365	1	OPPOSITE
1aC_NlaIII_SBONC6	LOC564395	3 prime	50.078 kb	chr18	20107957	1	OPPOSITE
1aC_NlaIII_SBONC6	mta2	intron 3	within gene	chr7	17264346	1	SAME
1aC_NlaIII_SBONC6	si:dkey-77p13.2	3 prime	19.435 kb	chr20	20556327	1	OPPOSITE
1aC_NlaIII_SBONC6	zgc:123267	intron 11	within gene	chr13	32808817	1	SAME
1aC_NlaIII_SBONC6	wnt11	5 prime	5.791 kb	chr5	35472045	1	OPPOSITE
1aC_NlaIII_SBONC6	im:7138264	5 prime	29.275 kb	chr12	20874529	1	SAME
1aC_NlaIII_SBONC6	napg	3 prime	10.721 kb	chr2	41845690	1	SAME
1aC_NlaIII_SBONC6	tusc3	intron 3	within gene	chr1	15458517	1	SAME
1aC_NlaIII_SBONC6				chr14	45157106	1
1aC_NlaIII_SBONC6	zgc:174273	intron 1	within gene	chr4	28065285	1	OPPOSITE
1aC_NlaIII_SBONC6	tbc1d22a	intron 4	within gene	chr4	32525297	1	SAME
1aC_NlaIII_SBONC6				chr17	33603259	1
1aC_NlaIII_SBONC6	fgf13	3 prime	76.377 kb	chr14	33456074	1	OPPOSITE
1aC_NlaIII_SBONC6	npc2	5 prime	10.046 kb	chr17	38802489	1	SAME
1aC_NlaIII_SBONC6	cmlc1	3 prime	52.819 kb	chr5	66015403	1	OPPOSITE
1aC_NlaIII_SBONC6	zgc:103561	3 prime	52.572 kb	chr5	59515188	1	OPPOSITE
1aC_NlaIII_SBONC6	phactr4	intron 1	within gene	chr16	33175125	1	OPPOSITE
1aC_NlaIII_SBONC6				chr14	40104573	1
1aC_NlaIII_SBONC6	LOC568915	intron 6	within gene	chr1	38275218	1	SAME
1aC_NlaIII_SBONC6	mxtx1	5 prime	0.688 kb	chr13	22283075	1	OPPOSITE
1aC_NlaIII_SBONC6	spata18	3 prime	24.294 kb	chr20	22434486	1	SAME
1aC_NlaIII_SBONC6	LOC100149820	exon 2	within gene	chr13	23327593	1	SAME
1aC_NlaIII_SBONC6	spoplb	3 prime	33.128 kb	chr11	34005517	1	SAME
1aC_NlaIII_SBONC6	rhof	3 prime	0.753 kb	chr10	40771366	1	SAME
1aC_NlaIII_SBONC6				chr15	5304633	1
1aC_NlaIII_SBONC6	zgc:173962	5 prime	45.517 kb	chr2	12070929	1	SAME
1aC_NlaIII_SBONC6	pllp	intron 3	within gene	chr18	19226960	1	SAME
1aC_NlaIII_SBONC6	zgc:103652	3 prime	31.033 kb	chr2	9010789	1	OPPOSITE
1aC_NlaIII_SBONC6	spred2	5 prime	8.412 kb	chr13	6252140	1	SAME
1aC_NlaIII_SBONC6				chr12	39835132	1
1aC_NlaIII_SBONC6	LOC100001681	intron 1	within gene	chr8	9705286	1	OPPOSITE
1aC_NlaIII_SBONC6	si:dkey-46n18.4	3 prime	59.075 kb	chr17	27069816	1	OPPOSITE
1aC_NlaIII_SBONC6	napgl	3 prime	57.646 kb	chr24	821517	1	SAME
1aC_NlaIII_SBONC6	si:ch211-105d11.2	3 prime	54.348 kb	chr19	12058506	1	OPPOSITE
1aC_NlaIII_SBONC6	fam168a	5 prime	3.908 kb	chr18	3405047	1	OPPOSITE
1aC_NlaIII_SBONC6				chr6	54955264	1
1aC_NlaIII_SBONC6				chr14	27920361	1
1aC_NlaIII_SBONC6	stard3nl	3 prime	6.744 kb	chr2	29838262	1	OPPOSITE
1aC_NlaIII_SBONC6	park2	5 prime	58.854 kb	chr13	3679514	1	SAME
1aC_NlaIII_SBONC6	mapk8	exon 2	within gene	chr12	1798388	1	OPPOSITE
1aC_NlaIII_SBONC6	zgc:153639	5 prime	0.820 kb	chr24	19597880	1	SAME
1aC_NlaIII_SBONC6	accn1	intron 8	within gene	chr3	35715787	1	SAME
1aC_NlaIII_SBONC6	si:ch211-197k23.4	5 prime	28.917 kb	chr24	28290027	1	SAME
1aC_NlaIII_SBONC6	grhl2b	5 prime	13.253 kb	chr19	12410799	1	SAME
1aC_NlaIII_SBONC6				chr12	39834612	1
1aC_NlaIII_SBONC6	nlgn1	intron 1	within gene	chr2	2879381	1	SAME
1aC_NlaIII_SBONC6	zgc:91909	5 prime	24.828 kb	chr8	51977206	1	SAME
1aC_NlaIII_SBONC6	h3f3a	5 prime	93.858 kb	chr3	42925179	1	SAME
1aC_NlaIII_SBONC6	pdzk1l	3 prime	20.248 kb	chr9	5320430	1	OPPOSITE
1aC_NlaIII_SBONC6	arpc5lb	3 prime	15.079 kb	chr5	30161685	1	SAME
1aC_NlaIII_SBONC6	bactin2	5 prime	0.131 kb	chr3	37653073	1	SAME
1aC_NlaIII_SBONC6	slc48a1a	5 prime	15.128 kb	chr23	32895516	1	SAME
1aC_NlaIII_SBONC6				chr14	26760024	1
1aC_NlaIII_SBONC6	pofut2	intron 4	within gene	chr9	41122742	1	OPPOSITE
1aC_NlaIII_SBONC6	dact1	3 prime	54.496 kb	chr17	8692803	1	SAME
1aC_NlaIII_SBONC6	tnnt2a	3 prime	9.740 kb	chr23	4461688	1	SAME
1aC_NlaIII_SBONC6	bactin2	intron 1	within gene	chr3	37651773	1	SAME
1aC_NlaIII_SBONC6	si:ch211-236d22.1	intron 4	within gene	chr1	52643413	1	SAME
1aC_NlaIII_SBONC6	sept8b	intron 9	within gene	chr14	49977628	1	OPPOSITE
1aC_NlaIII_SBONC6	tpma	5 prime	64.698 kb	chr7	30181039	1	OPPOSITE
1aC_NlaIII_SBONC6	ddx52	intron 7	within gene	chr21	40708926	1	SAME
1aC_NlaIII_SBONC6	zgc:114140	5 prime	852.350 kb	chr16	6000577	1	OPPOSITE
1aC_NlaIII_SBONC6	jmjd5	5 prime	29.302 kb	chr3	39650040	1	SAME
1aC_NlaIII_SBONC6	silvb	5 prime	10.020 kb	chr23	35567675	1	OPPOSITE
1aC_NlaIII_SBONC6	fabp2	3 prime	5.321 kb	chr1	26378594	1	OPPOSITE
1aC_NlaIII_SBONC6				chr4	55770824	1
1aC_NlaIII_SBONC6	sh3pxd2a	intron 4	within gene	chr1	47992879	1	OPPOSITE
1aC_NlaIII_SBONC6				chr14	26770725	1
1aC_NlaIII_SBONC6				chr3	26647018	1
1aC_NlaIII_SBONC6	zgc:101037	5 prime	10.087 kb	chr20	31934592	1	OPPOSITE
1aC_NlaIII_SBONC6				chr25	25563783	1
1aC_NlaIII_SBONC6	zgc:112352	intron 9	within gene	chr3	8861477	1	OPPOSITE
1aC_NlaIII_SBONC6	dr1	3 prime	51.910 kb	chr6	25774545	1	OPPOSITE
1aC_NlaIII_SBONC6				chr1	12467451	1
1aC_NlaIII_SBONC6	arpc5lb	3 prime	14.893 kb	chr5	30161871	1	OPPOSITE
1aC_NlaIII_SBONC6	zgc:158309	3 prime	150.666 kb	chr3	46756611	1	SAME
1aC_NlaIII_SBONC6	bmf2	3 prime	23.853 kb	chr20	44952521	1	SAME
1aC_NlaIII_SBONC6	si:ch73-52e5.1	intron 2	within gene	chr2	52679500	1	SAME
1aC_NlaIII_SBONC6	grin1b	intron 13	within gene	chr5	27699315	1	SAME
1aC_NlaIII_SBONC6	ctnna2	intron 1	within gene	chr1	44420533	1	SAME
1aC_NlaIII_SBONC6				chr5	5991592	1
1aC_NlaIII_SBONC6				chr15	18090949	1
1aC_NlaIII_SBONC6	si:ch211-204a13.4	3 prime	0.949 kb	chr19	17638854	1	OPPOSITE
1aC_NlaIII_SBONC6				chr9	8168047	1
1aC_NlaIII_SBONC6	slc4a2b	5 prime	56.330 kb	chr2	49697047	1	SAME
1aC_NlaIII_SBONC6	arf1l	3 prime	40.510 kb	chr24	34698105	1	SAME
1aC_NlaIII_SBONC6	pthlh	5 prime	54.991 kb	chr4	1480470	1	OPPOSITE
1aC_NlaIII_SBONC6	gsg1l	5 prime	36.433 kb	chr3	26169346	1	OPPOSITE
1aC_NlaIII_SBONC6	lnpa	5 prime	39.420 kb	chr23	40963051	1	OPPOSITE
1aC_NlaIII_SBONC6	zgc:110030	intron 2	within gene	chr12	4191468	1	OPPOSITE
1aC_NlaIII_SBONC6	nkx2.2a	5 prime	28.595 kb	chr17	40597797	1	SAME
1aC_NlaIII_SBONC6	lpp	intron 3	within gene	chr6	30136995	1	SAME
1aC_NlaIII_SBONC6	tbck	intron 19	within gene	chr1	50223763	1	OPPOSITE
1aC_NlaIII_SBONC6	bmp7b	intron 1	within gene	chr23	4786826	1	OPPOSITE
1aC_NlaIII_SBONC6	si:dkey-180p18.2	intron 2	within gene	chr4	14793570	1	OPPOSITE
1aC_NlaIII_SBONC6	zgc:101791	3 prime	81.572 kb	chr10	36950690	1	SAME
1aC_NlaIII_SBONC6				chr7	13030567	1
1aC_NlaIII_SBONC6				chr4	45861400	1
1aC_NlaIII_SBONC6	si:rp71-56i13.6	intron 3	within gene	chr10	27976155	1	SAME
1aC_NlaIII_SBONC6				chr19	45738841	1
1aC_NlaIII_SBONC6				chr20	12920431	1
1aC_NlaIII_SBONC6	zgc:91999	5 prime	15.884 kb	chr24	37511003	1	OPPOSITE
1aC_NlaIII_SBONC6	atp13a2	intron 12	within gene	chr23	23996071	1	SAME
1aC_NlaIII_SBONC6	pknox2	3 prime	171.617 kb	chr10	29134018	1	OPPOSITE
1aC_NlaIII_SBONC6	sp7	intron 1	within gene	chr6	60547857	1	OPPOSITE
1aC_NlaIII_SBONC6	msxa	5 prime	7.032 kb	chr14	25456782	1	SAME
1aC_NlaIII_SBONC6	si:dkeyp-66g8.1	5 prime	48.654 kb	chr19	40955854	1	OPPOSITE
1aC_NlaIII_SBONC6	racgap1	5 prime	41.328 kb	chr23	33335536	1	SAME
1aC_NlaIII_SBONC6				chr14	38409030	1
1aC_NlaIII_SBONC6	serpind1	5 prime	43.275 kb	chr8	2015583	1	OPPOSITE
1aC_NlaIII_SBONC6	fgf21	5 prime	0.758 kb	chr3	28596663	1	OPPOSITE
1aC_NlaIII_SBONC6				chr19	34467436	1
1aC_NlaIII_SBONC6	igfbp5a	5 prime	108.873 kb	chr9	49106516	1	SAME
1aC_NlaIII_SBONC6	gpr137ba	intron 1	within gene	chr17	14264193	1	SAME
1aC_NlaIII_SBONC6				chr14	5230319	1
1aC_NlaIII_SBONC6				chr2	37246395	1
1aC_NlaIII_SBONC6	zgc:86905	5 prime	1.801 kb	chr4	5918345	1	OPPOSITE
1aC_NlaIII_SBONC6	zdhhc5	3 prime	159.193 kb	chr5	16073653	1	OPPOSITE
1aC_NlaIII_SBONC6	efnb3b	intron 1	within gene	chr7	20689741	1	OPPOSITE
1aC_NlaIII_SBONC6	ext1c	5 prime	14.712 kb	chr19	47103359	1	OPPOSITE
1aC_NlaIII_SBONC6	zgc:123210	intron 1	within gene	chr16	48534491	1	OPPOSITE
1aC_NlaIII_SBONC6	zgc:153997	3 prime	53.970 kb	chr8	10115247	1	OPPOSITE
1aC_NlaIII_SBONC6				chr16	15362338	1
1aC_NlaIII_SBONC6				chr24	36744620	1
1aC_NlaIII_SBONC6	lhfp	intron 2	within gene	chr10	30072610	1	OPPOSITE
1aC_NlaIII_SBONC6	mdkb	5 prime	38.356 kb	chr25	4623353	1	OPPOSITE
1aC_NlaIII_SBONC6	si:xx-bac7cse.2	intron 2	within gene	chr5	45484208	1	SAME
1aC_NlaIII_SBONC6	atoh2a	5 prime	35.923 kb	chr24	32139843	1	OPPOSITE
1aC_NlaIII_SBONC6	dock5	intron 39	within gene	chr8	6521586	1	SAME
1aC_NlaIII_SBONC6	stip1	5 prime	74.401 kb	chr5	68963604	1	SAME
1aC_NlaIII_SBONC6	zgc:152953	5 prime	18.636 kb	chr12	39574786	1	OPPOSITE
1aC_NlaIII_SBONC6	nog1	3 prime	29.370 kb	chr3	7219839	1	OPPOSITE
1aC_NlaIII_SBONC6	prph2b	3 prime	84.020 kb	chr13	3100726	1	SAME
1aC_NlaIII_SBONC6	si:dkey-246a16.3	5 prime	19.682 kb	chr18	20320257	1	SAME
1aC_NlaIII_SBONC6	fezf1	5 prime	52.127 kb	chr25	29453812	1	OPPOSITE
1aC_NlaIII_SBONC6	smtla	intron 1	within gene	chr14	389877	1	OPPOSITE
1aC_NlaIII_SBONC6	zgc:162872	3 prime	97.999 kb	chr15	45675053	1	SAME
1aC_NlaIII_SBONC6				chr14	26253044	1
1aC_NlaIII_SBONC6	zgc:153976	3 prime	52.982 kb	chr11	40426943	1	SAME
1aC_NlaIII_SBONC6	gria4b	intron 11	within gene	chr21	23661828	1	SAME
1aC_NlaIII_SBONC6	syt11a	3 prime	3.621 kb	chr19	22847266	1	SAME
1aC_NlaIII_SBONC6	acsbg2	intron 8	within gene	chr8	20545019	1	SAME
1aC_NlaIII_SBONC6	zgc:92411	intron 1	within gene	chr18	26517858	1	OPPOSITE
1aC_NlaIII_SBONC6	zgc:66160	3 prime	100.368 kb	chr3	24883729	1	OPPOSITE
1aC_NlaIII_SBONC6	atpaf2	3 prime	71.309 kb	chr12	17354137	1	OPPOSITE
1aC_NlaIII_SBONC6	stxbp1	intron 8	within gene	chr21	14352125	1	OPPOSITE
1aC_NlaIII_SBONC6	tra2b	5 prime	7.958 kb	chr9	12157208	1	OPPOSITE
1aC_NlaIII_SBONC6	adcy8	intron 2	within gene	chr2	41943707	1	SAME
1aC_NlaIII_SBONC6				chr9	36943784	1
1aC_NlaIII_SBONC6	arl6	3 prime	23.122 kb	chr1	34660783	1	OPPOSITE
1aC_NlaIII_SBONC6	LOC556154	3 prime	69.635 kb	chr5	48589764	1	SAME
1aC_NlaIII_SBONC6	zgc:123096	3 prime	5.663 kb	chr9	23525650	1	SAME
1aC_NlaIII_SBONC6	aif1l	3 prime	54.861 kb	chr5	32966717	1	OPPOSITE
1aC_NlaIII_SBONC6	zgc:175096	5 prime	8.562 kb	chr16	23679986	1	SAME
1aC_NlaIII_SBONC6	dnajc3	3 prime	28.367 kb	chr9	29934386	1	SAME
1aC_NlaIII_SBONC6	lgmn	5 prime	4.122 kb	chr13	36350320	1	SAME
1aC_NlaIII_SBONC6	igdcc3	5 prime	69.875 kb	chr7	31998993	1	SAME
1aC_NlaIII_SBONC6	scn8ab	intron 1	within gene	chr6	43021724	1	OPPOSITE
1aC_NlaIII_SBONC6	plagx	5 prime	20.628 kb	chr23	31547636	1	OPPOSITE
1aC_NlaIII_SBONC6	nubp1	intron 7	within gene	chr3	24302764	1	OPPOSITE
1aC_NlaIII_SBONC6	eif3ha	intron 5	within gene	chr16	43996913	1	SAME
1aC_NlaIII_SBONC6	st6galnac3	3 prime	181.154 kb	chr2	8580144	1	OPPOSITE
1aC_NlaIII_SBONC6				chr6	39961690	1
1aC_NlaIII_SBONC6	stk17b	5 prime	17.461 kb	chr9	23579890	1	SAME
1aC_NlaIII_SBONC6	zgc:110206	3 prime	93.866 kb	chr2	6173891	1	SAME
1aC_NlaIII_SBONC6	slc35c2	3 prime	14.892 kb	chr23	19991141	1	OPPOSITE
1aC_NlaIII_SBONC6	nkd1	5 prime	59.548 kb	chr7	38089572	1	SAME
1aC_NlaIII_SBONC6	zgc:77294	intron 5	within gene	chr7	29035370	1	OPPOSITE
1aC_NlaIII_SBONC6	si:ch211-147a11.7	intron 3	within gene	chr8	22726319	1	SAME
1aC_NlaIII_SBONC6	relt	5 prime	88.229 kb	chr18	3168846	1	SAME
1aC_NlaIII_SBONC6				chr7	2073768	1
1aC_NlaIII_SBONC6	pxk	intron 12	within gene	chr22	10278950	1	SAME
1aC_NlaIII_SBONC6	adcy3l	5 prime	61.560 kb	chr16	1833943	1	SAME
1aC_NlaIII_SBONC6	gnrhr2	3 prime	91.772 kb	chr7	53456402	1	SAME
1aC_NlaIII_SBONC6	arid3a	intron 2	within gene	chr5	40345748	1	OPPOSITE
1aC_NlaIII_SBONC6	as3mt	3 prime	40.530 kb	chr1	31679725	1	SAME
1aC_NlaIII_SBONC6				chr16	2483931	1
1aC_NlaIII_SBONC6	vps33b	intron 19	within gene	chr7	51030359	1	SAME
1aC_NlaIII_SBONC6	sft2d1	3 prime	83.163 kb	chr13	4577507	1	SAME
1aC_NlaIII_SBONC6				chr16	32278325	1
1aC_NlaIII_SBONC6	ppardb	intron 6	within gene	chr8	24488050	1	SAME
1aC_NlaIII_SBONC6	spon1a	intron 2	within gene	chr18	31861667	1	OPPOSITE
1aC_NlaIII_SBONC6	rorab	intron 3	within gene	chr7	29821312	1	OPPOSITE
1aC_NlaIII_SBONC6	rps28	3 prime	16.311 kb	chr2	22787281	1	OPPOSITE
1aC_NlaIII_SBONC6	dhrs3b	3 prime	66.334 kb	chr11	28439695	1	SAME
1aC_NlaIII_SBONC6	hlxb9la	5 prime	13.295 kb	chr9	7242411	1	SAME
1aC_NlaIII_SBONC6				chr7	21381533	1
1aC_NlaIII_SBONC6	zgc:91860	intron 1	within gene	chr18	17778712	1	OPPOSITE
1aC_NlaIII_SBONC6	bbip10	5 prime	3.924 kb	chr22	32185663	1	SAME
1aC_NlaIII_SBONC6	relt	5 prime	22.720 kb	chr18	3103337	1	OPPOSITE
1aC_NlaIII_SBONC6	prkag1	5 prime	21.588 kb	chr6	2033287	1	OPPOSITE
1aC_NlaIII_SBONC6	jup	intron 12	within gene	chr11	11452431	1	OPPOSITE
1aC_NlaIII_SBONC6				chr7	72122768	1
1aC_NlaIII_SBONC6	foxk1	3 prime	47.480 kb	chr3	38008646	1	OPPOSITE
1aC_NlaIII_SBONC6	si:dkey-251i10.1	3 prime	18.387 kb	chr5	69204417	1	SAME
1aC_NlaIII_SBONC6	mbnl1	3 prime	131.931 kb	chr2	45906095	1	OPPOSITE
1aC_NlaIII_SBONC6	top1l	5 prime	22.855 kb	chr11	25054678	1	OPPOSITE
1aC_NlaIII_SBONC6	zgc:110418	5 prime	83.189 kb	chr18	45142052	1	OPPOSITE
1aC_NlaIII_SBONC6				chr19	35576451	1
1aC_NlaIII_SBONC6	ankrd13b	intron 1	within gene	chr15	29026480	1	OPPOSITE
1aC_NlaIII_SBONC6	uros	intron 2	within gene	chr12	46271145	1	OPPOSITE
1aC_NlaIII_SBONC6				chr9	15198072	1
1aC_NlaIII_SBONC6	acsbg2	3 prime	18.171 kb	chr8	20576229	1	OPPOSITE
1aC_NlaIII_SBONC6	ect2	3 prime	85.985 kb	chr11	8394015	1	OPPOSITE
1aC_NlaIII_SBONC6	pias4l	intron 2	within gene	chr2	53379727	1	SAME
1aC_NlaIII_SBONC6	pbx4	intron 6	within gene	chr3	50525851	1	SAME
1aC_NlaIII_SBONC6	cart1	exon 4	within gene	chr18	16438523	1	OPPOSITE
1aC_NlaIII_SBONC6	si:dkey-14a7.1	5 prime	28.631 kb	chr20	43287885	1	OPPOSITE
1aC_NlaIII_SBONC6	gle1l	intron 13	within gene	chr8	2728638	1	SAME
1aC_NlaIII_SBONC6	yipf3	3 prime	61.070 kb	chr13	4078973	1	SAME
1aC_NlaIII_SBONC6	nprl2	5 prime	78.196 kb	chr6	24269774	1	OPPOSITE
1aC_NlaIII_SBONC6	foxk1	intron 6	within gene	chr3	38031759	1	OPPOSITE
1aC_NlaIII_SBONC6	zgc:163107	3 prime	64.090 kb	chr12	11986645	1	SAME
1aC_NlaIII_SBONC6	tars	5 prime	120.744 kb	chr5	43256492	1	OPPOSITE
1aC_NlaIII_SBONC6				chr24	6998026	1
1aC_NlaIII_SBONC6	igf1rb	3 prime	79.021 kb	chr7	12946760	1	OPPOSITE
1aC_NlaIII_SBONC6				chr12	37106160	1
1aC_NlaIII_SBONC6	zgc:153351	5 prime	17.114 kb	chr3	57872	1	SAME
1aC_NlaIII_SBONC6	si:ch211-254e15.1	intron 1	within gene	chr19	34104643	1	SAME
1aC_NlaIII_SBONC6	rps9	5 prime	55.769 kb	chr16	44394482	1	SAME
1aC_NlaIII_SBONC6	ppp2ca	5 prime	26.686 kb	chr14	50095936	1	OPPOSITE
1aC_NlaIII_SBONC6				chr17	17832177	1
1aC_NlaIII_SBONC6	fat1	5 prime	175.051 kb	chr1	16758100	1	OPPOSITE
1aC_NlaIII_SBONC6	nrxn1a	exon 1	within gene	chr12	28487837	1	SAME
1aC_NlaIII_SBONC6				chr17	25958478	1
1aC_NlaIII_SBONC6	npm4	intron 10	within gene	chr14	6111708	1	SAME
1aC_NlaIII_SBONC6	cx43	3 prime	11.370 kb	chr20	40614039	1	SAME
1aC_NlaIII_SBONC6	zgc:64042	intron 14	within gene	chr16	36976312	1	OPPOSITE
1aC_NlaIII_SBONC6				chr1	48979639	1
1aC_NlaIII_SBONC6	ada	intron 8	within gene	chr23	25415156	1	OPPOSITE
1aC_NlaIII_SBONC6	hirip5	3 prime	15.055 kb	chr8	50611779	1	OPPOSITE
1aC_NlaIII_SBONC6	scn2b	5 prime	24.806 kb	chr15	9167544	1	OPPOSITE
1aC_NlaIII_SBONC6	zgc:113071	5 prime	1.523 kb	chr16	2149604	1	OPPOSITE
1aC_NlaIII_SBONC6	rps9	5 prime	35.244 kb	chr16	44373957	1	SAME
1aC_NlaIII_SBONC6	gtf2f1	5 prime	61.377 kb	chr3	31313795	1	SAME
1aC_NlaIII_SBONC6	zgc:66382	5 prime	94.787 kb	chr16	24518161	1	SAME
1aC_NlaIII_SBONC6	ilvbl	intron 5	within gene	chr18	43913759	1	OPPOSITE
1aC_NlaIII_SBONC6	cx52.6	3 prime	53.213 kb	chr20	23531598	1	OPPOSITE
1aC_NlaIII_SBONC6	zgc:153505	3 prime	54.277 kb	chr24	31942800	1	OPPOSITE
1aC_NlaIII_SBONC6	ddx23	intron 10	within gene	chr23	13841825	1	OPPOSITE
1aC_NlaIII_SBONC6	fbp1a	5 prime	46.218 kb	chr5	43895932	1	OPPOSITE
1aC_NlaIII_SBONC6	fn1	intron 9	within gene	chr9	14967109	1	OPPOSITE
1aC_NlaIII_SBONC6	nasp	3 prime	9.657 kb	chr6	35677619	1	OPPOSITE
1aC_NlaIII_SBONC6	tspo	intron 1	within gene	chr6	44156736	1	OPPOSITE
1aC_NlaIII_SBONC6	zgc:113169	3 prime	5.372 kb	chr9	42003411	1	SAME
1aC_NlaIII_SBONC6	sptlc1	intron 10	within gene	chr10	5503158	1	OPPOSITE
1aC_NlaIII_SBONC6	epha4b	3 prime	178.959 kb	chr2	40378184	1	SAME
1aC_NlaIII_SBONC6	foxb1.1	3 prime	28.548 kb	chr7	29758621	1	OPPOSITE
1aC_NlaIII_SBONC6	aqp4	5 prime	68.232 kb	chr20	17145968	1	OPPOSITE
1aC_NlaIII_SBONC6	si:ch211-137i24.10	intron 1	within gene	chr5	22203274	1	SAME
1aC_NlaIII_SBONC6	psmd14	3 prime	92.778 kb	chr11	8781703	1	SAME
1aC_NlaIII_SBONC6	olfm3	intron 1	within gene	chr24	27745765	1	OPPOSITE
1aC_NlaIII_SBONC6	actn3b	3 prime	184.123 kb	chr7	5946787	1	SAME
1aC_NlaIII_SBONC6	ppm1e	3 prime	3.471 kb	chr10	30869186	1	OPPOSITE
1aC_NlaIII_SBONC6	f9	5 prime	13.379 kb	chr14	33698505	1	OPPOSITE
1aC_NlaIII_SBONC6	rab18a	5 prime	37.159 kb	chr12	26877904	1	SAME
1aC_NlaIII_SBONC6	zgc:153440	3 prime	20.985 kb	chr8	7309658	1	SAME
1aC_NlaIII_SBONC6	rfc3	3 prime	46.352 kb	chr10	32134437	1	OPPOSITE
1aC_NlaIII_SBONC6	pitpnb	3 prime	71.615 kb	chr10	4148501	1	SAME
1aC_NlaIII_SBONC6	mir2193	3 prime	4.262 kb	chr20	47339955	1	SAME
1aC_NlaIII_SBONC6	cadm4	intron 2	within gene	chr16	22800439	1	SAME
1aC_NlaIII_SBONC6	zgc:163071	3 prime	17.009 kb	chr9	2167607	1	OPPOSITE
1aC_NlaIII_SBONC6	nfybb	3 prime	65.665 kb	chr25	30137095	1	OPPOSITE
1aC_NlaIII_SBONC6				chr4	68550414	1
1aC_NlaIII_SBONC6				chr9	49575393	1
1aC_NlaIII_SBONC6	hsp47	5 prime	64.857 kb	chr15	29986216	1	SAME
1aC_NlaIII_SBONC6				chr3	25632567	1
1aC_NlaIII_SBONC6				chr6	21608153	1
1aC_NlaIII_SBONC6	eif2b5	5 prime	20.047 kb	chr2	2934744	1	OPPOSITE
1aC_NlaIII_SBONC6	fgf8a	5 prime	8.792 kb	chr13	33461637	1	SAME
1aC_NlaIII_SBONC6	zgc:109889	intron 3	within gene	chr7	23570112	1	SAME
1aC_NlaIII_SBONC6	cs	5 prime	52.153 kb	chr23	33395198	1	SAME
1aC_NlaIII_SBONC6				chr9	45487342	1
1aC_NlaIII_SBONC6	oclna	5 prime	87.764 kb	chr10	3098260	1	SAME
1aC_NlaIII_SBONC6	zgc:173714	3 prime	8.196 kb	chr4	27330675	1	OPPOSITE
1aC_NlaIII_SBONC6	med10	5 prime	21.490 kb	chr19	26926462	1	OPPOSITE
1aC_NlaIII_SBONC6	zgc:92024	3 prime	55.691 kb	chr6	16555097	1	OPPOSITE
1aC_NlaIII_SBONC6	zgc:73336	5 prime	4.700 kb	chr5	69568635	1	SAME
1aC_NlaIII_SBONC6	lama5	intron 12	within gene	chr23	8318646	1	OPPOSITE
1aC_NlaIII_SBONC6	rab6b	intron 7	within gene	chr6	29531042	1	OPPOSITE
1aC_NlaIII_SBONC6	entpd3	5 prime	12.241 kb	chr16	7107105	1	SAME
1aC_NlaIII_SBONC6	mybl2	intron 4	within gene	chr11	1675441	1	SAME
1aC_NlaIII_SBONC6	mitfb	5 prime	8.250 kb	chr23	647598	1	SAME
1aC_NlaIII_SBONC6	hlx1	exon 4	within gene	chr20	50019210	1	SAME
1aC_NlaIII_SBONC6	tmem135	exon 5	within gene	chr10	20734692	1	OPPOSITE
1aC_NlaIII_SBONC6	zgc:153386	5 prime	14.225 kb	chr7	35293075	1	SAME
1aC_NlaIII_SBONC6	cdh23	intron 22	within gene	chr13	43642210	1	OPPOSITE
1aC_NlaIII_SBONC6				chr15	24307004	1
1aC_NlaIII_SBONC6	smpd4	5 prime	117.809 kb	chr21	19832790	1	SAME
1aC_NlaIII_SBONC6	zgc:123269	3 prime	1.103 kb	chr8	43854962	1	OPPOSITE
1aC_NlaIII_SBONC6	vps13a	intron 44	within gene	chr8	52981863	1	OPPOSITE
1aC_NlaIII_SBONC6	copeb	3 prime	17.378 kb	chr24	4087853	1	SAME
1aC_NlaIII_SBONC6	zgc:103568	5 prime	111.377 kb	chr13	28426511	1	SAME
1aC_NlaIII_SBONC6	zgc:153639	3 prime	28.757 kb	chr24	19568303	1	SAME
1aC_NlaIII_SBONC6	mpv17	intron 4	within gene	chr20	38593289	1	SAME
1aC_NlaIII_SBONC6	ywhah	intron 1	within gene	chr10	14890985	1	OPPOSITE
1aC_NlaIII_SBONC6	zgc:194930	5 prime	69.320 kb	chr7	67663096	1	OPPOSITE
1aC_NlaIII_SBONC6	cbsb	3 prime	126.419 kb	chr9	8487040	1	SAME
1aC_NlaIII_SBONC6	crfa	5 prime	5.153 kb	chr24	10856781	1	OPPOSITE
1aC_NlaIII_SBONC6	il13ra1	intron 3	within gene	chr7	18792391	1	SAME
1aC_NlaIII_SBONC6	si:dkey-182g1.2	3 prime	83.793 kb	chr22	8472817	1	SAME
1aC_NlaIII_SBONC6	si:dkeyp-34c12.1	3 prime	74.658 kb	chr22	31397946	1	OPPOSITE
1aC_NlaIII_SBONC6	fam46bb	3 prime	24.219 kb	chr19	16901405	1	SAME
1aC_NlaIII_SBONC6	si:ch211-206k20.4	intron 19	within gene	chr13	32093638	1	OPPOSITE
1aC_NlaIII_SBONC6	pbx2	5 prime	37.667 kb	chr16	46666426	1	SAME
1aC_NlaIII_SBONC6	zgc:154027	3 prime	3.597 kb	chr7	76399942	1	SAME
1aC_NlaIII_SBONC6	hs3st4	intron 1	within gene	chr3	41623324	1	SAME
1aC_NlaIII_SBONC6				chr16	5178232	1
1aC_NlaIII_SBONC6				chr15	39573263	1
1aC_NlaIII_SBONC6	pth1ra	intron 2	within gene	chr2	1033550	1	OPPOSITE
1aC_NlaIII_SBONC6	icln	intron 5	within gene	chr18	2031703	1	OPPOSITE
1aC_NlaIII_SBONC6				chr22	14686747	1
1aC_NlaIII_SBONC6	si:dkey-69h6.7	5 prime	104.832 kb	chr5	15628626	1	OPPOSITE
1aC_NlaIII_SBONC6	fzd8a	5 prime	70.852 kb	chr24	4477449	1	SAME
1aC_NlaIII_SBONC6				chr7	32604031	1
1aC_NlaIII_SBONC6	txndc5	intron 4	within gene	chr24	7908781	1	SAME
1aC_NlaIII_SBONC6	clic2	3 prime	8.957 kb	chr14	35295477	1	OPPOSITE
1aC_NlaIII_SBONC6	barhl2	3 prime	40.896 kb	chr6	26663322	1	OPPOSITE
1aC_NlaIII_SBONC6	tbxas1	intron 5	within gene	chr18	12667157	1	OPPOSITE
1aC_NlaIII_SBONC6	zgc:162344	intron 5	within gene	chr21	9801440	1	SAME
1aC_NlaIII_SBONC6	cadm1a	intron 10	within gene	chr21	26524615	1	OPPOSITE
1aC_NlaIII_SBONC6	zgc:158291	5 prime	19.354 kb	chr21	40004597	1	OPPOSITE
1aC_NlaIII_SBONC6	gbp	3 prime	18.336 kb	chr16	39841833	1	OPPOSITE
1aC_NlaIII_SBONC6	vti1a	intron 7	within gene	chr12	30054667	1	OPPOSITE
1aC_NlaIII_SBONC6				chr10	4482999	1
1aC_NlaIII_SBONC6	cyyr1	intron 4	within gene	chr19	47739607	1	OPPOSITE
1aC_NlaIII_SBONC6	pdia5	5 prime	99.140 kb	chr9	38372692	1	SAME
1aC_NlaIII_SBONC6	ano2	3 prime	95.268 kb	chr4	4712461	1	SAME
1aC_NlaIII_SBONC6	zgc:153279	3 prime	1.069 kb	chr24	33221103	1	SAME
1aC_NlaIII_SBONC6	slc6a19	5 prime	101.742 kb	chr16	34602037	1	OPPOSITE
1aC_NlaIII_SBONC6	tnni1b	5 prime	76.807 kb	chr6	58478652	1	OPPOSITE
1aC_NlaIII_SBONC6	zgc:91890	5 prime	14.576 kb	chr16	4241394	1	OPPOSITE
1aC_NlaIII_SBONC6	prdx5	3 prime	1.758 kb	chr21	28971117	1	OPPOSITE
1aC_NlaIII_SBONC6	lmo2	intron 2	within gene	chr18	35421645	1	OPPOSITE
1aC_NlaIII_SBONC6	cdon	5 prime	62.934 kb	chr18	43079692	1	SAME
1aC_NlaIII_SBONC6	ahr1b	intron 2	within gene	chr22	11039877	1	SAME
1aC_NlaIII_SBONC6	zgc:55877	5 prime	39.028 kb	chr3	832489	1	SAME
1aC_NlaIII_SBONC6	zgc:55318	intron 13	within gene	chr18	41617106	1	OPPOSITE
1aC_NlaIII_SBONC6	snai3	5 prime	32.820 kb	chr7	57530245	1	OPPOSITE
1aC_NlaIII_SBONC6				chr12	22179390	1
1aC_NlaIII_SBONC6	mrpl23	5 prime	73.219 kb	chr25	24770826	1	OPPOSITE
1aC_NlaIII_SBONC6	hat1	3 prime	31.745 kb	chr9	3667687	1	SAME
1aC_NlaIII_SBONC6	sepw1	3 prime	20.499 kb	chr5	63503578	1	OPPOSITE
1aC_NlaIII_SBONC6	zgc:194437	3 prime	4.240 kb	chr25	20631986	1	OPPOSITE
1aC_NlaIII_SBONC6				chr25	28492614	1
1aC_NlaIII_SBONC6	cog3	intron 1	within gene	chr9	51755153	1	SAME
1aC_NlaIII_SBONC6	slc39a10	3 prime	72.707 kb	chr9	24432416	1	SAME
1aC_NlaIII_SBONC6	cadm1a	intron 9	within gene	chr21	26493915	1	OPPOSITE
1aC_NlaIII_SBONC6	roraa	3 prime	29.316 kb	chr25	35231898	1	SAME
1aC_NlaIII_SBONC6				chr1	36266027	1
1aC_NlaIII_SBONC6	otud5a	intron 7	within gene	chr8	8690526	1	OPPOSITE
1aC_NlaIII_SBONC6	myo5a	intron 1	within gene	chr18	38615946	1	SAME
1aC_NlaIII_SBONC6	zgc:114123	5 prime	18.605 kb	chr23	1774129	1	OPPOSITE
1aC_NlaIII_SBONC6				chr1	14066386	1
1aC_NlaIII_SBONC6	tfap2c	intron 6	within gene	chr6	59093307	1	SAME
1aC_NlaIII_SBONC6				chr19	35495259	1
1aC_NlaIII_SBONC6				chr24	2131692	1
1aC_NlaIII_SBONC6				chr4	51135926	1
1aC_NlaIII_SBONC6	hccs	5 prime	17.185 kb	chr24	30635788	1	SAME
1aC_NlaIII_SBONC6	fdps	3 prime	13.979 kb	chr16	12755231	1	OPPOSITE
1aC_NlaIII_SBONC6	anp32e	3 prime	19.265 kb	chr19	41642074	1	SAME
1aC_NlaIII_SBONC6	zgc:154013	intron 9	within gene	chr8	50280740	1	OPPOSITE
1aC_NlaIII_SBONC6	sesn3	5 prime	53.276 kb	chr15	35830882	1	SAME
1aC_NlaIII_SBONC6	copeb	3 prime	63.768 kb	chr24	4041463	1	OPPOSITE
1aC_NlaIII_SBONC6	dhrs11a	intron 1	within gene	chr5	2717330	1	SAME
1aC_NlaIII_SBONC6	zgc:92670	5 prime	6.463 kb	chr13	8954434	1	OPPOSITE
1aC_NlaIII_SBONC6				chr14	52301589	1
1aC_NlaIII_SBONC6	zgc:55970	5 prime	18.274 kb	chr23	40621581	1	SAME
1aC_NlaIII_SBONC6	zgc:152785	3 prime	65.248 kb	chr15	27391736	1	OPPOSITE
1aC_NlaIII_SBONC6	vil1l	intron 12	within gene	chr9	47659628	1	SAME
1aC_NlaIII_SBONC6	b3galnt2	3 prime	10.089 kb	chr13	49142420	1	OPPOSITE
1aC_NlaIII_SBONC6	zgc:173702	intron 1	within gene	chr4	46955354	1	OPPOSITE
1aC_NlaIII_SBONC6				chr18	42046328	1
1aC_NlaIII_SBONC6	sepm	3 prime	32.133 kb	chr5	70831417	1	SAME
1aC_NlaIII_SBONC6	kdm6al	3 prime	0.781 kb	chr6	61560176	1	OPPOSITE
1aC_NlaIII_SBONC6	wdr36	5 prime	2.272 kb	chr5	56695746	1	SAME
1aC_NlaIII_SBONC6	gats	5 prime	77.310 kb	chr5	62503420	1	SAME
1aC_NlaIII_SBONC6	zgc:112435	5 prime	78.042 kb	chr6	60988804	1	OPPOSITE
1aC_NlaIII_SBONC6	fgf14	intron 1	within gene	chr9	32305513	1	OPPOSITE
1aC_NlaIII_SBONC6	rbbp5	5 prime	36.296 kb	chr22	35757707	1	SAME
1aC_NlaIII_SBONC6				chr5	4890996	1
1aC_NlaIII_SBONC6	zgc:112352	intron 9	within gene	chr3	9042082	1	SAME
1aC_NlaIII_SBONC6				chr18	29714790	1
1aC_NlaIII_SBONC6	gsk3a	5 prime	116.399 kb	chr16	9819456	1	SAME
1aC_NlaIII_SBONC6	mypt2	intron 4	within gene	chr6	23428365	1	OPPOSITE
1aC_NlaIII_SBONC6	lrrc50	5 prime	9.908 kb	chr7	29253554	1	SAME
1aC_NlaIII_SBONC6	zgc:172062	5 prime	56.683 kb	chr8	2172123	1	SAME
1aC_NlaIII_SBONC6	msi2b	intron 6	within gene	chr15	31212401	1	SAME
1aC_NlaIII_SBONC6	si:ch211-251b21.1	5 prime	20.254 kb	chr8	49556977	1	SAME
1aC_NlaIII_SBONC6				chr17	23870537	1
1aC_NlaIII_SBONC6	stau2	intron 5	within gene	chr24	11845065	1	OPPOSITE
1aC_NlaIII_SBONC6	sec13	3 prime	5.293 kb	chr22	33624613	1	OPPOSITE
1aC_NlaIII_SBONC6				chr21	32469040	1
1aC_NlaIII_SBONC6	mrps31	intron 2	within gene	chr5	22182672	1	OPPOSITE
1aC_NlaIII_SBONC6	unc5b	3 prime	42.311 kb	chr13	28762470	1	SAME
1aC_NlaIII_SBONC6	zgc:63914	5 prime	19.886 kb	chr19	5222297	1	OPPOSITE
1aC_NlaIII_SBONC6	parvab	3 prime	49.257 kb	chr7	69238652	1	OPPOSITE
1aC_NlaIII_SBONC6	zgc:162324	5 prime	91.301 kb	chr6	49746517	1	SAME
1aC_NlaIII_SBONC6	nipa2	3 prime	3.025 kb	chr6	40096599	1	SAME
1aC_NlaIII_SBONC6	tprb	intron 41	within gene	chr20	33943071	1	OPPOSITE
1aC_NlaIII_SBONC6	zgc:92739	intron 2	within gene	chr19	31986556	1	SAME
1aC_NlaIII_SBONC6				chr17	7105863	1
1aC_NlaIII_SBONC6	zgc:123242	intron 8	within gene	chr1	10607456	1	SAME
1aC_NlaIII_SBONC6	camk2g1	5 prime	41.062 kb	chr12	34416433	1	SAME
1aC_NlaIII_SBONC6	pax6b	5 prime	97.291 kb	chr7	15060120	1	SAME
1aC_NlaIII_SBONC6	mtmr6	intron 4	within gene	chr24	24580827	1	SAME
1aC_NlaIII_SBONC6	si:ch211-106g4.2	5 prime	47.281 kb	chr8	27424305	1	SAME
1aC_NlaIII_SBONC6				chr21	10163565	1
1aC_NlaIII_SBONC6	ncalda	intron 2	within gene	chr16	8386131	1	SAME
1aC_NlaIII_SBONC6	fscn1l	5 prime	26.599 kb	chr12	33677976	1	OPPOSITE
1aC_NlaIII_SBONC6	lrrc48	intron 6	within gene	chr3	60466491	1	OPPOSITE
1aC_NlaIII_SBONC6	fam125ba	3 prime	65.266 kb	chr24	30860182	1	OPPOSITE
1aC_NlaIII_SBONC6				chr5	11428937	1
1aC_NlaIII_SBONC6	zgc:175221	intron 7	within gene	chr20	8559724	1	OPPOSITE
1aC_NlaIII_SBONC6	relt	5 prime	73.503 kb	chr18	3154120	1	OPPOSITE
1aC_NlaIII_SBONC6	dye	intron 8	within gene	chr18	17903538	1	OPPOSITE
1aC_NlaIII_SBONC6				chr17	45168118	1
1aC_NlaIII_SBONC6	stx5al	3 prime	11.457 kb	chr21	28873202	1	OPPOSITE
1aC_NlaIII_SBONC6	zgc:114157	5 prime	60.364 kb	chr8	8191414	1	SAME
1aC_NlaIII_SBONC6				chr5	11428940	1
1aC_NlaIII_SBONC6	ap3s2	5 prime	45.076 kb	chr25	9652432	1	OPPOSITE
1aC_NlaIII_SBONC6	ociad1	intron 7	within gene	chr20	22534888	1	OPPOSITE
1aC_NlaIII_SBONC6	rapgef1	intron 12	within gene	chr21	3863724	1	SAME
1aC_NlaIII_SBONC6	kcnq1	intron 9	within gene	chr7	49242337	1	SAME
1aC_NlaIII_SBONC6				chr19	6306565	1
1aC_NlaIII_SBONC6	samm50	3 prime	13.779 kb	chr25	19712399	1	SAME
1aC_NlaIII_SBONC6	add1	3 prime	165.354 kb	chr21	2192557	1	SAME
1aC_NlaIII_SBONC6	stau2	intron 13	within gene	chr24	12015635	1	OPPOSITE
1aC_NlaIII_SBONC6	zgc:174164	intron 21	within gene	chr12	12040865	1	OPPOSITE
1aC_NlaIII_SBONC6				chr4	68452832	1
1aC_NlaIII_SBONC6	stard3nl	intron 1	within gene	chr2	29817198	1	SAME
1aC_NlaIII_SBONC6	hs6st3	intron 1	within gene	chr9	29849114	1	OPPOSITE
1aC_NlaIII_SBONC6	zgc:63491	intron 7	within gene	chr25	20227549	1	OPPOSITE
1aC_NlaIII_SBONC6	zgc:86751	5 prime	29.483 kb	chr23	4487433	1	OPPOSITE
1aC_NlaIII_SBONC6	cacna1ba	intron 3	within gene	chr5	27513363	1	SAME
1aC_NlaIII_SBONC6	lrrc3	5 prime	16.631 kb	chr9	42404734	1	OPPOSITE
1aC_NlaIII_SBONC6	tll1	intron 17	within gene	chr1	20295905	1	SAME
1aC_NlaIII_SBONC6	zgc:158657	5 prime	19.396 kb	chr16	4915144	1	OPPOSITE
1aC_NlaIII_SBONC6	grem1a	3 prime	54.444 kb	chr20	29131259	1	SAME
1aC_NlaIII_SBONC6	zgc:153625	3 prime	94.201 kb	chr17	45020956	1	OPPOSITE
1aC_NlaIII_SBONC6				chr9	9855820	1
1aC_NlaIII_SBONC6	mlh1	intron 14	within gene	chr13	43119193	1	SAME
1aC_NlaIII_SBONC6	coq10b	5 prime	27.905 kb	chr9	32560048	1	OPPOSITE
1aC_NlaIII_SBONC6	zgc:163064	5 prime	19.969 kb	chr11	40654567	1	SAME
1aC_NlaIII_SBONC6	gabra1	intron 3	within gene	chr3	60823092	1	SAME
1aC_NlaIII_SBONC6	myh11	5 prime	9.668 kb	chr6	9377453	1	SAME
1aC_NlaIII_SBONC6	zgc:92275	3 prime	16.714 kb	chr21	9161780	1	OPPOSITE
1aC_NlaIII_SBONC6	dlgap5	exon 6	within gene	chr12	15844281	1	SAME
1aC_NlaIII_SBONC6	zgc:65960	intron 2	within gene	chr13	35269700	1	SAME
1aC_NlaIII_SBONC6	tbc1d22a	intron 13	within gene	chr4	32735924	1	OPPOSITE
1aC_NlaIII_SBONC6	zgc:92231	5 prime	95.717 kb	chr6	9619415	1	OPPOSITE
1aC_NlaIII_SBONC6	asb4	5 prime	37.745 kb	chr19	39488665	1	SAME
1aC_NlaIII_SBONC6	epb4.1l4	intron 1	within gene	chr10	2722201	1	OPPOSITE
1aC_NlaIII_SBONC6	zgc:165515	3 prime	21.915 kb	chr4	65605574	1	SAME
1aC_NlaIII_SBONC6				chr7	54554971	1
1aC_NlaIII_SBONC6	baiap2l1b	3 prime	119.788 kb	chr3	59523349	1	SAME
1aC_NlaIII_SBONC6	pcgf5a	5 prime	49.610 kb	chr17	21150218	1	OPPOSITE
1aC_NlaIII_SBONC6	zgc:101095	intron 5	within gene	chr20	34346062	1	SAME
1aC_NlaIII_SBONC6	gnrhr4	5 prime	45.647 kb	chr18	24499904	1	OPPOSITE
1aC_NlaIII_SBONC6	itgb3a	intron 1	within gene	chr3	16155780	1	SAME
1aC_NlaIII_SBONC6				chr3	21824536	1
1aC_NlaIII_SBONC6	ace2	3 prime	0.280 kb	chr11	31748824	1	OPPOSITE
1aC_NlaIII_SBONC6	negr1	intron 6	within gene	chr6	40744999	1	OPPOSITE
1aC_NlaIII_SBONC6	zgc:114180	3 prime	23.261 kb	chr3	47979898	1	OPPOSITE
1aC_NlaIII_SBONC6	cx39.4	5 prime	17.182 kb	chr19	36411044	1	OPPOSITE
1aC_NlaIII_SBONC6	msxb	5 prime	34.414 kb	chr1	48776147	1	SAME
1aC_NlaIII_SBONC6	fabp11b	3 prime	72.321 kb	chr16	14459942	1	SAME
1aC_NlaIII_SBONC6	ehd3	5 prime	57.224 kb	chr20	38076880	1	SAME
1aC_NlaIII_SBONC6	si:dkey-18n13.4	intron 1	within gene	chr13	42554128	1	SAME
1aC_NlaIII_SBONC6				chr18	14040917	1
1aC_NlaIII_SBONC6	tmem8a	5 prime	9.107 kb	chr1	8573052	1	OPPOSITE
1aC_NlaIII_SBONC6	scn4ab	5 prime	10.176 kb	chr3	18297640	1	SAME
1aC_NlaIII_SBONC6	nefm	5 prime	6.241 kb	chr8	6725238	1	SAME
1aC_NlaIII_SBONC6	si:ch1073-126c3.2	5 prime	12.289 kb	chr13	34744024	1	OPPOSITE
1aC_NlaIII_SBONC6	zgc:174694	intron 1	within gene	chr4	49700110	1	SAME
1aC_NlaIII_SBONC6	prpf40a	3 prime	49.253 kb	chr9	4640630	1	OPPOSITE
1aC_NlaIII_SBONC6	cox16	5 prime	1.007 kb	chr13	36617950	1	SAME
1aC_NlaIII_SBONC6	tmem49	5 prime	28.962 kb	chr15	16074365	1	SAME
1aC_NlaIII_SBONC6	lifra	intron 1	within gene	chr5	5856561	1	OPPOSITE
1aC_NlaIII_SBONC6	pex10	5 prime	18.616 kb	chr8	48682295	1	SAME
1aC_NlaIII_SBONC6	atoh2a	5 prime	34.795 kb	chr24	32140971	1	SAME
1aC_NlaIII_SBONC6	osbpl2	5 prime	45.512 kb	chr23	8150375	1	SAME
1aC_NlaIII_SBONC6	zgc:175108	5 prime	105.116 kb	chr6	37411240	1	SAME
1aC_NlaIII_SBONC6	spon1b	intron 10	within gene	chr25	15524351	1	OPPOSITE
1aC_NlaIII_SBONC6	zgc:92757	5 prime	101.077 kb	chr20	46376068	1	OPPOSITE
1aC_NlaIII_SBONC6	cart1	5 prime	47.229 kb	chr18	16391507	1	OPPOSITE
1aC_NlaIII_SBONC6	zgc:158293	3 prime	98.591 kb	chr24	244437	1	OPPOSITE
1aC_NlaIII_SBONC6				chr20	6198452	1
1aC_NlaIII_SBONC6	chkb	5 prime	11.864 kb	chr18	9159887	1	SAME
1aC_NlaIII_SBONC6	dhx15	3 prime	2.226 kb	chr7	75673206	1	SAME
1aC_NlaIII_SBONC6	pomgnt1	3 prime	40.355 kb	chr6	36461924	1	OPPOSITE
1aC_NlaIII_SBONC6	col5a2l	5 prime	13.894 kb	chr9	42966977	1	SAME
1aC_NlaIII_SBONC6	rad21	5 prime	21.005 kb	chr16	44177422	1	SAME
1aC_NlaIII_SBONC6				chr16	25819129	1
1aC_NlaIII_SBONC6	slc12a10.2	intron 25	within gene	chr7	4280529	1	OPPOSITE
1aC_NlaIII_SBONC6	ruvbl1	exon 4	within gene	chr6	44411961	1	OPPOSITE
1aC_NlaIII_SBONC6	trpc5	intron 6	within gene	chr1	9163382	1	OPPOSITE
1aC_NlaIII_SBONC6	zgc:64072	intron 2	within gene	chr1	389355	1	SAME
1aC_NlaIII_SBONC6	smyd3	intron 5	within gene	chr17	10042029	1	OPPOSITE
1aC_NlaIII_SBONC6				chr23	14177673	1
1aC_NlaIII_SBONC6				chr4	49575855	1
1aC_NlaIII_SBONC6	si:ch211-45m15.1	5 prime	45.434 kb	chr20	2095925	1	OPPOSITE
1aC_NlaIII_SBONC6	cpb1	5 prime	36.703 kb	chr24	4766386	1	SAME
1aC_NlaIII_SBONC6	zgc:158363	3 prime	35.880 kb	chr15	2227127	1	SAME
1aC_NlaIII_SBONC6	nrxn3b	3 prime	144.731 kb	chr10	4647552	1	SAME
1aC_NlaIII_SBONC6	camk2n1	3 prime	41.775 kb	chr2	43962153	1	OPPOSITE
1aC_NlaIII_SBONC6				chr16	15305695	1
1aC_NlaIII_SBONC6	zgc:110017	3 prime	23.642 kb	chr19	2784420	1	SAME
1aC_NlaIII_SBONC6	si:dkey-46l15.1	intron 3	within gene	chr6	54388340	1	OPPOSITE
1aC_NlaIII_SBONC6	ptf1a	3 prime	79.717 kb	chr2	27753615	1	SAME
1aC_NlaIII_SBONC6	rad51c	intron 5	within gene	chr10	30746784	1	SAME
1aC_NlaIII_SBONC6	msi2b	intron 8	within gene	chr15	31081506	1	SAME
1aC_NlaIII_SBONC6	zgc:100856	5 prime	33.753 kb	chr10	39523227	1	SAME
1aC_NlaIII_SBONC6				chr24	5080665	1
1aC_NlaIII_SBONC6	zcchc9	3 prime	8.104 kb	chr10	40902063	1	OPPOSITE
1aC_NlaIII_SBONC6	cep63	intron 9	within gene	chr6	29573772	1	OPPOSITE
1aC_NlaIII_SBONC6	stm	5 prime	5.084 kb	chr19	3202396	1	SAME
1aC_NlaIII_SBONC6	cfdl	5 prime	8.876 kb	chr13	13729218	1	SAME
1aC_NlaIII_SBONC6				chr8	10302962	1
1aC_NlaIII_SBONC6	smg5	5 prime	83.785 kb	chr16	43490236	1	SAME
1aC_NlaIII_SBONC6	laptm4b	intron 6	within gene	chr19	32020577	1	SAME
1aC_NlaIII_SBONC6	zgc:153505	intron 5	within gene	chr24	31384279	1	SAME
1aC_NlaIII_SBONC6	nkain4	5 prime	88.991 kb	chr23	14131657	1	SAME
1aC_NlaIII_SBONC6	fzd3l	5 prime	148.998 kb	chr17	7161879	1	OPPOSITE
1aC_NlaIII_SBONC6				chr7	72658153	1
1aC_NlaIII_SBONC6	podxl	intron 1	within gene	chr4	11349701	1	SAME
1aC_NlaIII_SBONC6	pitx3	3 prime	74.424 kb	chr13	7201917	1	SAME
1aC_NlaIII_SBONC6	zgc:172103	5 prime	12.023 kb	chr23	37009969	1	SAME
1aC_NlaIII_SBONC6	insb	5 prime	37.983 kb	chr14	29934288	1	SAME
1aC_NlaIII_SBONC6	gpr27	3 prime	64.822 kb	chr6	48059445	1	SAME
1aC_NlaIII_SBONC6	zgc:136336	intron 5	within gene	chr2	51878790	1	SAME
1aC_NlaIII_SBONC6	daam1b	intron 23	within gene	chr20	21015609	1	SAME
1aC_NlaIII_SBONC6	prps1a	3 prime	25.423 kb	chr5	21202588	1	SAME
1aC_NlaIII_SBONC6	antxr2a	3 prime	109.349 kb	chr5	38101394	1	SAME
1aC_NlaIII_SBONC6				chr2	47839282	1
1aC_NlaIII_SBONC6	hdr	intron 5	within gene	chr5	25533076	1	SAME
1aC_NlaIII_SBONC6	cx52.6	3 prime	30.663 kb	chr20	23509048	1	SAME
1aC_NlaIII_SBONC6	gpr137ba	5 prime	12.003 kb	chr17	14293239	1	SAME
1aC_NlaIII_SBONC6				chr6	41880616	1
1aC_NlaIII_SBONC6	zgc:110692	exon 9	within gene	chr15	71000	1	OPPOSITE
1aC_NlaIII_SBONC6	si:ch211-81i17.1	intron 6	within gene	chr22	22699133	1	OPPOSITE
1aC_NlaIII_SBONC6	rps9	5 prime	35.082 kb	chr16	44373795	1	SAME
1aC_NlaIII_SBONC6				chr22	38478074	1
1aC_NlaIII_SBONC6				chr14	52057688	1
1aC_NlaIII_SBONC6	sccpdha	3 prime	37.519 kb	chr17	10357217	1	SAME
1aC_NlaIII_SBONC6	arl3l1	3 prime	0.435 kb	chr12	31619996	1	OPPOSITE
1aC_NlaIII_SBONC6	chordc1	5 prime	25.442 kb	chr3	764010	1	OPPOSITE
1aC_NlaIII_SBONC6	zgc:110694	3 prime	4.411 kb	chr8	18305754	1	SAME
1aC_NlaIII_SBONC6	zgc:136888	intron 9	within gene	chr13	20778639	1	SAME
1aC_NlaIII_SBONC6	LOC567595	intron 9	within gene	chr25	17213847	1	SAME
1aC_NlaIII_SBONC6				chr15	23021739	1
1aC_NlaIII_SBONC6	zgc:153120	intron 1	within gene	chr15	45035496	1	OPPOSITE
1aC_NlaIII_SBONC6	napa	intron 9	within gene	chr18	44005409	1	SAME
1aC_NlaIII_SBONC6	zgc:112350	intron 2	within gene	chr3	26937	1	OPPOSITE
1aC_NlaIII_SBONC6	nlgn2b	intron 1	within gene	chr7	21999667	1	OPPOSITE
1aC_NlaIII_SBONC6	zgc:174694	5 prime	76.346 kb	chr4	49790445	1	SAME
1aC_NlaIII_SBONC6				chr21	14813823	1
1aC_NlaIII_SBONC6	usp16	3 prime	62.630 kb	chr15	41594894	1	SAME
1aC_NlaIII_SBONC6	zgc:55318	intron 1	within gene	chr18	41783677	1	SAME
1aC_NlaIII_SBONC6				chr7	64213661	1
1aC_NlaIII_SBONC6	vrk1	5 prime	26.842 kb	chr17	17702334	1	SAME
1aC_NlaIII_SBONC6	zgc:55856	3 prime	114.890 kb	chr3	6757468	1	SAME
1aC_NlaIII_SBONC6	ctbp2	intron 1	within gene	chr17	7382048	1	SAME
1aC_NlaIII_SBONC6				chr11	37936552	1
1aC_NlaIII_SBONC6	adra2a	3 prime	75.143 kb	chr22	32048698	1	OPPOSITE
1aC_NlaIII_SBONC6	zgc:110141	intron 6	within gene	chr14	8091948	1	SAME
1aC_NlaIII_SBONC6	sertad2	intron 1	within gene	chr13	25265434	1	OPPOSITE
1aC_NlaIII_SBONC6				chr3	40445964	1
1aC_NlaIII_SBONC6				chr7	63928627	1
1aC_NlaIII_SBONC6	plod3	intron 19	within gene	chr23	43815976	1	SAME
1aC_NlaIII_SBONC6				chr25	6760995	1
1aC_NlaIII_SBONC6	dixdc1	3 prime	0.719 kb	chr15	16828174	1	SAME
1aC_NlaIII_SBONC6	zgc:63570	3 prime	64.612 kb	chr4	4068158	1	OPPOSITE
1aC_NlaIII_SBONC6	elovl4a	3 prime	16.558 kb	chr16	3806191	1	OPPOSITE
1aC_NlaIII_SBONC6	zgc:113090	5 prime	33.635 kb	chr3	30201792	1	SAME
1aC_NlaIII_SBONC6				chr3	44176661	1
1aC_NlaIII_SBONC6	dnd	5 prime	72.759 kb	chr14	7704064	1	OPPOSITE
1aC_NlaIII_SBONC6	zgc:152851	5 prime	28.619 kb	chr1	43421380	1	OPPOSITE
1aC_NlaIII_SBONC6	zgc:114087	3 prime	46.173 kb	chr6	9445293	1	SAME
1aC_NlaIII_SBONC6				chr25	31388450	1
1aC_NlaIII_SBONC6	cnga5	intron 1	within gene	chr5	61859657	1	SAME
1aC_NlaIII_SBONC6	si:dkey-127j5.5	5 prime	11.554 kb	chr5	28562039	1	OPPOSITE
1aC_NlaIII_SBONC6	fam46b	3 prime	11.433 kb	chr16	32974428	1	SAME
1aC_NlaIII_SBONC6	glceb	intron 1	within gene	chr7	33763228	1	OPPOSITE
1aC_NlaIII_SBONC6	zgc:154027	5 prime	128.137 kb	chr7	76268208	1	OPPOSITE
1aC_NlaIII_SBONC6	atoh2a	5 prime	36.034 kb	chr24	32139732	1	OPPOSITE
1aC_NlaIII_SBONC6	evlb	intron 1	within gene	chr20	51703625	1	OPPOSITE
1aC_NlaIII_SBONC6	negr1	intron 6	within gene	chr6	40681617	1	SAME
1aC_NlaIII_SBONC6	lmo4a	3 prime	10.039 kb	chr5	31283234	1	SAME
1aC_NlaIII_SBONC6				chr5	43096423	1
1aC_NlaIII_SBONC6				chr6	55653194	1
1aC_NlaIII_SBONC6	svil	intron 25	within gene	chr12	28008238	1	OPPOSITE
1aC_NlaIII_SBONC6				chr21	46353501	1
1aC_NlaIII_SBONC6	rpl35	5 prime	17.232 kb	chr21	5184954	1	SAME
1aC_NlaIII_SBONC6	zgc:162040	intron 1	within gene	chr16	39121551	1	SAME
1aC_NlaIII_SBONC6	si:dkey-77p13.2	intron 2	within gene	chr20	20517986	1	OPPOSITE
1aC_NlaIII_SBONC6	ap1s1	intron 1	within gene	chr7	26312069	1	SAME
1aC_NlaIII_SBONC6	zgc:153423	5 prime	50.047 kb	chr10	35502634	1	OPPOSITE
1aC_NlaIII_SBONC6	zgc:56112	5 prime	50.819 kb	chr6	53399435	1	OPPOSITE
1aC_NlaIII_SBONC6	zgc:92712	3 prime	7.736 kb	chr6	17775791	1	OPPOSITE
1aC_NlaIII_SBONC6	lonp2	intron 12	within gene	chr18	18823375	1	SAME
1aC_NlaIII_SBONC6				chr11	33470504	1
1aC_NlaIII_SBONC6	zgc:101777	3 prime	78.449 kb	chr3	52198690	1	SAME
1aC_NlaIII_SBONC6	kcnd2	intron 1	within gene	chr4	9989346	1	OPPOSITE
1aC_NlaIII_SBONC6				chr3	25593900	1
1aC_NlaIII_SBONC6	tpo	5 prime	48.635 kb	chr2	14092990	1	OPPOSITE
1aC_NlaIII_SBONC6	zgc:77151	5 prime	4.296 kb	chr21	38575204	1	OPPOSITE
1aC_NlaIII_SBONC6	notch1b	intron 28	within gene	chr5	67404934	1	SAME
1aC_NlaIII_SBONC6	lipc	intron 1	within gene	chr7	30693745	1	OPPOSITE
1aC_NlaIII_SBONC6	ahcyl2	3 prime	18.197 kb	chr4	6415681	1	OPPOSITE
1aC_NlaIII_SBONC6	rgl2	5 prime	92.177 kb	chr16	44596031	1	SAME
1aC_NlaIII_SBONC6	si:dkey-261j4.7	intron 2	within gene	chr5	62747743	1	SAME
1aC_NlaIII_SBONC6	suclg1	3 prime	119.049 kb	chr1	45609699	1	OPPOSITE
1aC_NlaIII_SBONC6	zgc:113361	5 prime	3.743 kb	chr18	47028286	1	SAME
1aC_NlaIII_SBONC6	ada	intron 8	within gene	chr23	25415404	1	OPPOSITE
1aC_NlaIII_SBONC6				chr5	32728505	1
1aC_NlaIII_SBONC6	ccdc43	5 prime	40.173 kb	chr3	28820809	1	SAME
1aC_NlaIII_SBONC6	klhl32	intron 8	within gene	chr16	31080964	1	OPPOSITE
1aC_NlaIII_SBONC6				chr11	38724752	1
1aC_NlaIII_SBONC6	sft2d3	5 prime	46.552 kb	chr2	4131252	1	SAME
1aC_NlaIII_SBONC6	sfrp1a	3 prime	40.088 kb	chr5	25709163	1	OPPOSITE
1aC_NlaIII_SBONC6	cyp2j30	5 prime	1.034 kb	chr20	25163199	1	OPPOSITE
1aC_NlaIII_SBONC6	gnai3	3 prime	3.076 kb	chr8	25991793	1	OPPOSITE
1aC_NlaIII_SBONC6	spata17	intron 9	within gene	chr17	27933147	1	SAME
1aC_NlaIII_SBONC6	cxxc1l	3 prime	24.328 kb	chr8	7694861	1	OPPOSITE
1aC_NlaIII_SBONC6	zgc:113255	3 prime	62.323 kb	chr10	33782348	1	SAME
1aC_NlaIII_SBONC6	slc23a1	intron 1	within gene	chr21	34046787	1	OPPOSITE
1aC_NlaIII_SBONC6				chr1	3748342	1
1aC_NlaIII_SBONC6	zgc:73142	intron 5	within gene	chr21	42790167	1	OPPOSITE
1aC_NlaIII_SBONC6				chr6	32632351	1
1aC_NlaIII_SBONC6	nxph1	intron 1	within gene	chr19	37138721	1	SAME
1aC_NlaIII_SBONC6	cadm4	intron 1	within gene	chr16	22880103	1	SAME
1aC_NlaIII_SBONC6	hspg2	3 prime	126.687 kb	chr23	25915979	1	OPPOSITE
1aC_NlaIII_SBONC6	scaper	intron 2	within gene	chr25	27642576	1	SAME
1aC_NlaIII_SBONC6				chr1	3870686	1
1aC_NlaIII_SBONC6	zgc:194930	5 prime	121.175 kb	chr7	67611241	1	SAME
1aC_NlaIII_SBONC6				chr11	33235312	1
1aC_NlaIII_SBONC6	setdb1b	5 prime	37.351 kb	chr16	20760340	1	SAME
1aC_NlaIII_SBONC6	hmgb2l	3 prime	88.394 kb	chr23	43478615	1	OPPOSITE
1aC_NlaIII_SBONC6	cldnj	intron 6	within gene	chr15	3258471	1	OPPOSITE
1aC_NlaIII_SBONC6	pbx4	intron 2	within gene	chr3	50502383	1	OPPOSITE
1aC_NlaIII_SBONC6				chr25	28409786	1
1aC_NlaIII_SBONC6	zgc:162164	5 prime	11.003 kb	chr20	51213036	1	SAME
1aC_NlaIII_SBONC6	usp14	3 prime	63.857 kb	chr1	3093338	1	SAME
1aC_NlaIII_SBONC6	si:ch211-51e12.4	intron 3	within gene	chr4	1752709	1	OPPOSITE
1aC_NlaIII_SBONC6	sptb	5 prime	87.808 kb	chr17	36280342	1	OPPOSITE
1aC_NlaIII_SBONC6	zgc:152851	5 prime	49.151 kb	chr1	43400848	1	OPPOSITE
1aC_NlaIII_SBONC6	zgc:158636	3 prime	91.044 kb	chr7	9749770	1	OPPOSITE
1aC_NlaIII_SBONC6	otof	intron 13	within gene	chr20	30886252	1	SAME
1aC_NlaIII_SBONC6	mlx	5 prime	30.819 kb	chr3	34298463	1	SAME
1aC_NlaIII_SBONC6				chr5	43193196	1
1aC_NlaIII_SBONC6	zgc:85889	3 prime	8.030 kb	chr3	58138235	1	SAME
1aC_NlaIII_SBONC6				chr7	72122931	1
1aC_NlaIII_SBONC6	nme6	3 prime	3.850 kb	chr20	18948091	1	OPPOSITE
1aC_NlaIII_SBONC6				chr10	32766236	1
1aC_NlaIII_SBONC6	prkcbb	intron 16	within gene	chr3	32545133	1	OPPOSITE
1aC_NlaIII_SBONC6				chr24	1422500	1
1aC_NlaIII_SBONC6	mpnd	intron 6	within gene	chr8	19153818	1	OPPOSITE
1aC_NlaIII_SBONC6	vapb	5 prime	18.561 kb	chr7	68239877	1	SAME
1aC_NlaIII_SBONC6	penk	5 prime	28.375 kb	chr7	61180907	1	SAME
1aC_NlaIII_SBONC6	kng1	3 prime	88.349 kb	chr22	39099741	1	OPPOSITE
1aC_NlaIII_SBONC6	pex10	3 prime	28.524 kb	chr8	48635155	1	SAME
1aC_NlaIII_SBONC6				chr1	26798780	1
1aC_NlaIII_SBONC6	zgc:65960	5 prime	16.013 kb	chr13	35507041	1	SAME
1aC_NlaIII_SBONC6	daam1b	intron 23	within gene	chr20	21015607	1	SAME
1aC_NlaIII_SBONC6	sept8a	5 prime	43.765 kb	chr21	45100342	1	OPPOSITE
1aC_NlaIII_SBONC6	pdcd10a	3 prime	84.946 kb	chr18	6881418	1	OPPOSITE
1aC_NlaIII_SBONC6	rpl35a	3 prime	42.182 kb	chr18	43286383	1	SAME
1aC_NlaIII_SBONC6	ptena	exon 8	within gene	chr17	21313900	1	OPPOSITE
1aC_NlaIII_SBONC6				chr12	5020070	1
1aC_NlaIII_SBONC6	athl1	5 prime	40.566 kb	chr25	3641062	1	OPPOSITE
1aC_NlaIII_SBONC6	shha	3 prime	44.949 kb	chr7	44191624	1	OPPOSITE
1aC_NlaIII_SBONC6	crip2	5 prime	34.245 kb	chr17	35278016	1	SAME
1aC_NlaIII_SBONC6				chr7	47159150	1
1aC_NlaIII_SBONC6	zgc:123318	5 prime	50.332 kb	chr20	5881564	1	SAME
1aC_NlaIII_SBONC6	zgc:174700	intron 2	within gene	chr4	56133791	1	SAME
1aC_NlaIII_SBONC6	zswim6	3 prime	2.518 kb	chr10	42940895	1	OPPOSITE
1aC_NlaIII_SBONC6	si:ch211-57i17.1	intron 6	within gene	chr20	44576484	1	SAME
1aC_NlaIII_SBONC6	pus1	5 prime	35.483 kb	chr21	15341441	1	SAME
1aC_NlaIII_SBONC6	gstp2	5 prime	54.569 kb	chr14	3346956	1	OPPOSITE
1aC_NlaIII_SBONC6	pcdh15a	intron 9	within gene	chr13	41967001	1	OPPOSITE
1aC_NlaIII_SBONC6				chr3	28110494	1
1aC_NlaIII_SBONC6	hhip	5 prime	5.879 kb	chr1	37040312	1	OPPOSITE
1aC_NlaIII_SBONC6				chr12	24952460	1
1aC_NlaIII_SBONC6	pcsk5a	intron 23	within gene	chr5	55543211	1	OPPOSITE
1aC_NlaIII_SBONC6	zgc:111880	exon 1	within gene	chr6	21173487	1	SAME
1aC_NlaIII_SBONC6	si:ch211-282j17.7	intron 1	within gene	chr7	3215186	1	SAME
1aC_NlaIII_SBONC6	zgc:111961	3 prime	4.789 kb	chr11	12252224	1	OPPOSITE
1aC_NlaIII_SBONC6	wdr5	3 prime	31.828 kb	chr21	19061039	1	SAME
1aC_NlaIII_SBONC6	ppil2	3 prime	49.437 kb	chr5	10238557	1	OPPOSITE
1aC_NlaIII_SBONC6	zgc:158299	5 prime	22.112 kb	chr11	25828170	1	SAME
1aC_NlaIII_SBONC6				chr12	39297790	1
1aC_NlaIII_SBONC6				chr13	48703417	1
1aC_NlaIII_SBONC6	zgc:162724	intron 4	within gene	chr22	33554209	1	SAME
1aC_NlaIII_SBONC6	fabp7b	5 prime	0.521 kb	chr20	40276213	1	SAME
1aC_NlaIII_SBONC6				chr15	45458981	1
1aC_NlaIII_SBONC6	anxa2a	5 prime	15.942 kb	chr25	35250805	1	OPPOSITE
1aC_NlaIII_SBONC6	ephx2	intron 7	within gene	chr17	6000789	1	SAME
1aC_NlaIII_SBONC6				chr23	1316958	1
1aC_NlaIII_SBONC6	nck2a	intron 1	within gene	chr9	5898742	1	SAME
1aC_NlaIII_SBONC6				chr22	7231685	1
1aC_NlaIII_SBONC6	edc4	3 prime	53.084 kb	chr18	22217319	1	SAME
1aC_NlaIII_SBONC6	kirrel3	5 prime	43.691 kb	chr9	26756053	1	OPPOSITE
1aC_NlaIII_SBONC6				chr13	28270117	1
1aC_NlaIII_SBONC6	pcdh15a	5 prime	98.195 kb	chr13	42264213	1	OPPOSITE
1aC_NlaIII_SBONC6	zplxdc1	intron 10	within gene	chr22	30375270	1	SAME
1aC_NlaIII_SBONC6	nrxn3b	intron 4	within gene	chr10	4736787	1	OPPOSITE
1aC_NlaIII_SBONC6				chr21	2127307	1
1aC_NlaIII_SBONC6	abcf2	5 prime	25.186 kb	chr2	30516725	1	OPPOSITE
1aC_NlaIII_SBONC6				chr22	37625463	1
1aC_NlaIII_SBONC6	pcdh2g10	3 prime	22.798 kb	chr14	1885590	1	SAME
1aC_NlaIII_SBONC6				chr11	40073031	1
1aC_NlaIII_SBONC6	zgc:154088	intron 1	within gene	chr10	7337436	1	OPPOSITE
1aC_NlaIII_SBONC6	zgc:171897	5 prime	67.696 kb	chr22	9876835	1	OPPOSITE
1aC_NlaIII_SBONC6	bre	5 prime	72.899 kb	chr5	12410431	1	SAME
1aC_NlaIII_SBONC6	zgc:165514	5 prime	1.316 kb	chr19	948669	1	SAME
1aC_NlaIII_SBONC6	si:ch211-245h14.3	3 prime	7.181 kb	chr20	38483677	1	OPPOSITE
1aC_NlaIII_SBONC6	si:ch211-205a14.3	5 prime	40.640 kb	chr4	31303841	1	SAME
1aC_NlaIII_SBONC6	brca2	intron 26	within gene	chr15	32400555	1	OPPOSITE
1aC_NlaIII_SBONC6				chr25	1002113	1
1aC_NlaIII_SBONC6				chr18	33504942	1
1aC_NlaIII_SBONC6	zgc:65960	intron 2	within gene	chr13	1831621	1	OPPOSITE
1aC_NlaIII_SBONC6	LOC569320	5 prime	49.708 kb	chr17	3250042	1	SAME
1aC_NlaIII_SBONC6	atg16l1	3 prime	0.109 kb	chr15	45217109	1	OPPOSITE
1aC_NlaIII_SBONC6	zgc:92850	3 prime	8.339 kb	chr8	49357683	1	OPPOSITE
1aC_NlaIII_SBONC6	rad23a	intron 7	within gene	chr1	51992383	1	OPPOSITE
1aC_NlaIII_SBONC6	phf10	exon 6	within gene	chr13	6291230	1	OPPOSITE
1aC_NlaIII_SBONC6	nkd1	intron 4	within gene	chr7	38001948	1	SAME
1aC_NlaIII_SBONC6	fn1	5 prime	76.222 kb	chr9	15054782	1	SAME
1aC_NlaIII_SBONC6	si:dkey-72l14.9	intron 1	within gene	chr8	26607467	1	SAME
1aC_NlaIII_SBONC6	mak	intron 10	within gene	chr24	8544811	1	SAME
1aC_NlaIII_SBONC6	dhcr24	5 prime	18.322 kb	chr20	6114076	1	SAME
1aC_NlaIII_SBONC6	zgc:85800	5 prime	4.238 kb	chr17	29491385	1	SAME
1aC_NlaIII_SBONC6	slc30a5	5 prime	50.620 kb	chr5	56187295	1	SAME
1aC_NlaIII_SBONC6	zgc:162132	3 prime	70.119 kb	chr7	14396416	1	OPPOSITE
1aC_NlaIII_SBONC6	cadm3	intron 5	within gene	chr2	42840721	1	OPPOSITE
1aC_NlaIII_SBONC6	pfdn5	5 prime	11.187 kb	chr6	43226012	1	OPPOSITE
1aC_NlaIII_SBONC6	msi1	intron 5	within gene	chr8	40239380	1	OPPOSITE
1aC_NlaIII_SBONC6	zgc:163086	5 prime	116.341 kb	chr6	23723548	1	SAME
1aC_NlaIII_SBONC6	spata17	3 prime	2.566 kb	chr17	27943988	1	SAME
1aC_NlaIII_SBONC6	zgc:162523	5 prime	73.425 kb	chr20	39998300	1	OPPOSITE
1aC_NlaIII_SBONC6	sgce	intron 1	within gene	chr19	39558066	1	OPPOSITE
1aC_NlaIII_SBONC6	oep	5 prime	100.347 kb	chr10	1854088	1	SAME
1aC_NlaIII_SBONC6	zgc:152651	5 prime	55.908 kb	chr7	53705450	1	SAME
1aC_NlaIII_SBONC6	cst3	5 prime	42.549 kb	chr13	34073109	1	OPPOSITE
1aC_NlaIII_SBONC6				chr6	54763101	1
1aC_NlaIII_SBONC6	tmem168a	5 prime	53.982 kb	chr4	5121959	1	OPPOSITE
1aC_NlaIII_SBONC6	nr6a1a	5 prime	31.132 kb	chr8	53266250	1	SAME
1aC_NlaIII_SBONC6	ntm	intron 1	within gene	chr10	28183616	1	OPPOSITE
1aC_NlaIII_SBONC6	zgc:86905	5 prime	1.283 kb	chr4	5917827	1	SAME
1aC_NlaIII_SBONC6	unc45a	intron 4	within gene	chr25	8524770	1	OPPOSITE
1aC_NlaIII_SBONC6				chr12	15192676	1
1aC_NlaIII_SBONC6	zgc:153112	3 prime	19.807 kb	chr15	33143350	1	SAME
1aC_NlaIII_SBONC6				chr2	47364558	1
1aC_NlaIII_SBONC6	snrk1	5 prime	3.362 kb	chr25	17648311	1	SAME
1aC_NlaIII_SBONC6	aacs	3 prime	126.766 kb	chr5	16789695	1	SAME
1aC_NlaIII_SBONC6	ube2e3	intron 3	within gene	chr9	44174050	1	OPPOSITE
1aC_NlaIII_SBONC6	zgc:171845	5 prime	3.445 kb	chr15	34288056	1	OPPOSITE
1aC_NlaIII_SBONC6	vtg1	5 prime	2.945 kb	chr22	25993744	1	SAME
1aC_NlaIII_SBONC6	zgc:153912	3 prime	9.569 kb	chr19	26474075	1	OPPOSITE
1aC_NlaIII_SBONC6	nckap1	intron 10	within gene	chr9	47818946	1	OPPOSITE
1aC_NlaIII_SBONC6				chr16	4629126	1
1aC_NlaIII_SBONC6	sh2d5	5 prime	8.238 kb	chr11	39548301	1	SAME
1aC_NlaIII_SBONC6	wnt10a	3 prime	54.622 kb	chr9	11019455	1	OPPOSITE
1aC_NlaIII_SBONC6				chr14	26811245	1
1aC_NlaIII_SBONC6	zgc:158823	5 prime	7.391 kb	chr24	7285003	1	OPPOSITE
1aC_NlaIII_SBONC6	gins2	3 prime	0.814 kb	chr18	28949975	1	OPPOSITE
1aC_NlaIII_SBONC6	slc38a4	3 prime	3.329 kb	chr4	2072374	1	SAME
1aC_NlaIII_SBONC6				chr11	20666936	1
1aC_NlaIII_SBONC6				chr25	10880342	1
1aC_NlaIII_SBONC6	tnika	intron 2	within gene	chr2	24386882	1	OPPOSITE
1aC_NlaIII_SBONC6	odz4	5 prime	75.430 kb	chr15	9857011	1	SAME
1aC_NlaIII_SBONC6	fbxl22	intron 1	within gene	chr25	27958438	1	SAME
1aC_NlaIII_SBONC6	tnnt2a	intron 5	within gene	chr23	4433740	1	SAME
1aC_NlaIII_SBONC6	zgc:113342	3 prime	5.823 kb	chr14	18818523	1	OPPOSITE
1aC_NlaIII_SBONC6	fgf21	3 prime	25.128 kb	chr3	28570777	1	SAME
1aC_NlaIII_SBONC6	zfyve21	intron 1	within gene	chr13	44189879	1	SAME
1aC_NlaIII_SBONC6	pop4	5 prime	89.694 kb	chr7	46496612	1	SAME
1aC_NlaIII_SBONC6	st6gal2-r	5 prime	18.249 kb	chr6	16745254	1	OPPOSITE
1aC_NlaIII_SBONC6	inab	3 prime	41.127 kb	chr1	31853448	1	SAME
1aC_NlaIII_SBONC6	si:ch211-67e16.9	5 prime	80.917 kb	chr9	13766572	1	SAME
1aC_NlaIII_SBONC6	zgc:114067	3 prime	44.674 kb	chr17	6397215	1	SAME
1aC_NlaIII_SBONC6				chr2	20273223	1
1aC_NlaIII_SBONC6	rps9	5 prime	36.634 kb	chr16	44375347	1	OPPOSITE
1aC_NlaIII_SBONC6	csnk1g2b	3 prime	49.186 kb	chr8	20976794	1	OPPOSITE
1aC_NlaIII_SBONC6				chr9	40475201	1
1aC_NlaIII_SBONC6				chr1	53577499	1
1aC_NlaIII_SBONC6	zgc:175221	3 prime	49.243 kb	chr20	9490682	1	OPPOSITE
1aC_NlaIII_SBONC6	zgc:85812	3 prime	85.037 kb	chr3	20078192	1	OPPOSITE
1aC_NlaIII_SBONC6	zgc:153020	intron 6	within gene	chr1	11037577	1	OPPOSITE
1aC_NlaIII_SBONC6	etv1	5 prime	56.923 kb	chr15	32918312	1	SAME
1aC_NlaIII_SBONC6	tapt1	intron 5	within gene	chr1	26573136	1	OPPOSITE
1aC_NlaIII_SBONC6	zgc:92261	intron 2	within gene	chr13	30189153	1	SAME
1aC_NlaIII_SBONC6	kcnq3	exon 11	within gene	chr2	42100790	1	OPPOSITE
1aC_NlaIII_SBONC6	zgc:92599	intron 3	within gene	chr5	18057680	1	SAME
1aC_NlaIII_SBONC6	syntaxin1b	intron 1	within gene	chr19	4838205	1	SAME
1aC_NlaIII_SBONC6	ivns1abpa	5 prime	54.055 kb	chr20	34185338	1	OPPOSITE
1aC_NlaIII_SBONC6	cyyr1	intron 8	within gene	chr1	57603900	1	OPPOSITE
1aC_NlaIII_SBONC6				chr12	8532275	1
1aC_NlaIII_SBONC6	cadm1b	3 prime	49.731 kb	chr15	18907989	1	SAME
1aC_NlaIII_SBONC6	LOC562468	3 prime	0.489 kb	chr5	19143347	1	OPPOSITE
1aC_NlaIII_SBONC6	zgc:171797	exon 11	within gene	chr14	51589168	1	SAME
1aC_NlaIII_SBONC6	lim2.5	intron 3	within gene	chr16	48103963	1	OPPOSITE
1aC_NlaIII_SBONC6	zgc:153175	3 prime	18.651 kb	chr17	16140428	1	OPPOSITE
1aC_NlaIII_SBONC6	ryr1b	intron 41	within gene	chr18	35199301	1	OPPOSITE
1aC_NlaIII_SBONC6	zgc:153049	3 prime	5.958 kb	chr13	39564480	1	OPPOSITE
1aC_NlaIII_SBONC6	slc39a7	3 prime	0.044 kb	chr19	13129559	1	OPPOSITE
1aC_NlaIII_SBONC6	rtn1b	intron 1	within gene	chr20	19871654	1	OPPOSITE
1aC_NlaIII_SBONC6	myct1	5 prime	13.459 kb	chr20	25718863	1	SAME
1aC_NlaIII_SBONC6	2010-03-07	intron 7	within gene	chr6	12743396	1	SAME
1aC_NlaIII_SBONC6	rps5	3 prime	20.242 kb	chr15	40296626	1	SAME
1aC_NlaIII_SBONC6	ablim1a	intron 15	within gene	chr13	44061406	1	SAME
1aC_NlaIII_SBONC6	zgc:158293	3 prime	98.593 kb	chr24	244439	1	OPPOSITE
1aC_NlaIII_SBONC6	rfc2	5 prime	4.034 kb	chr21	27359599	1	OPPOSITE
1aC_NlaIII_SBONC6	bcl6a	5 prime	13.657 kb	chr6	29840140	1	OPPOSITE
1aC_NlaIII_SBONC6	apoa1	3 prime	21.673 kb	chr5	36676979	1	OPPOSITE
1aC_NlaIII_SBONC6				chr7	75933767	1
1aC_NlaIII_SBONC6	zgc:113324	3 prime	63.330 kb	chr22	6518039	1	SAME
1aC_NlaIII_SBONC6	tmem8c	5 prime	71.700 kb	chr5	67608287	1	OPPOSITE
1aC_NlaIII_SBONC6	zgc:100947	intron 4	within gene	chr11	32061842	1	SAME
1aC_NlaIII_SBONC6				chr9	14597320	1
1aC_NlaIII_SBONC6	pomt1	3 prime	69.896 kb	chr5	52341569	1	OPPOSITE
1aC_NlaIII_SBONC6	zgc:103594	5 prime	26.658 kb	chr3	28401610	1	OPPOSITE
1aC_NlaIII_SBONC6	sra1	5 prime	33.205 kb	chr21	44519022	1	OPPOSITE
1aC_NlaIII_SBONC6				chr7	64091905	1
1aC_NlaIII_SBONC6				chr18	9908535	1
1aC_NlaIII_SBONC6	ppp2r2c	5 prime	25.121 kb	chr1	13398663	1	OPPOSITE
1aC_NlaIII_SBONC6	rpl5b	3 prime	12.230 kb	chr6	30970017	1	OPPOSITE
1aC_NlaIII_SBONC6	cdk5r1b	3 prime	83.681 kb	chr12	23904373	1	OPPOSITE
1aC_NlaIII_SBONC6	nop16	5 prime	89.722 kb	chr21	38967677	1	SAME
1aC_NlaIII_SBONC6	zgc:113078	5 prime	151.099 kb	chr1	24555944	1	SAME
1aC_NlaIII_SBONC6	zgc:112964	3 prime	87.733 kb	chr12	41814960	1	OPPOSITE
1aC_NlaIII_SBONC6	glra2	3 prime	3.880 kb	chr9	52816058	1	OPPOSITE
1aC_NlaIII_SBONC6	zgc:158741	3 prime	46.247 kb	chr16	24980019	1	SAME
1aC_NlaIII_SBONC6	mtr	intron 24	within gene	chr12	44309474	1	SAME
1aC_NlaIII_SBONC6	si:dkey-119f1.1	intron 21	within gene	chr2	5134794	1	OPPOSITE
1aC_NlaIII_SBONC6	zgc:175177	3 prime	10.883 kb	chr7	1555412	1	OPPOSITE
1aC_NlaIII_SBONC6				chr12	40363763	1
1aC_NlaIII_SBONC6	mtr	3 prime	1278.000 kb	chr12	44083449	1	OPPOSITE
1aC_NlaIII_SBONC6	adoa	5 prime	89.028 kb	chr12	8762521	1	OPPOSITE
1aC_NlaIII_SBONC6				chr15	40057153	1
1aC_NlaIII_SBONC6	LOC799704	intron 1	within gene	chr19	4401824	1	SAME
1aC_NlaIII_SBONC6	gbas	5 prime	29.542 kb	chr15	390896	1	SAME
1aC_NlaIII_SBONC6	ccdc80	5 prime	117.990 kb	chr9	34311482	1	OPPOSITE
1aC_NlaIII_SBONC6	fgfr1b	intron 1	within gene	chr10	40101203	1	SAME
1aC_NlaIII_SBONC6	zgc:92082	3 prime	19.518 kb	chr17	42087893	1	OPPOSITE
1aC_NlaIII_SBONC6	si:rp71-1f1.7	3 prime	32.175 kb	chr24	21622453	1	SAME
1aC_NlaIII_SBONC6	znf207a	3 prime	90.567 kb	chr3	31646691	1	SAME
1aC_NlaIII_SBONC6	fgg	intron 5	within gene	chr1	26196735	1	SAME
1aC_NlaIII_SBONC6	gria3b	intron 12	within gene	chr14	13043657	1	SAME
1aC_NlaIII_SBONC6				chr17	40266287	1
1aC_NlaIII_SBONC6	trdmt1	3 prime	3.177 kb	chr24	32673113	1	SAME
1aC_NlaIII_SBONC6	bhlhe22	3 prime	98.457 kb	chr24	24038842	1	SAME
1aC_NlaIII_SBONC6	si:ch211-255l12.2	intron 5	within gene	chr18	44090056	1	SAME
1aC_NlaIII_SBONC6	plk3	3 prime	22.578 kb	chr2	33566280	1	OPPOSITE
1aC_NlaIII_SBONC6				chr23	32144426	1
1aC_NlaIII_SBONC6	zgc:158685	3 prime	82.616 kb	chr10	20014930	1	OPPOSITE
1aC_NlaIII_SBONC6	cndp2	intron 3	within gene	chr19	19463882	1	OPPOSITE
1aC_NlaIII_SBONC6	sfrp5	3 prime	2.171 kb	chr13	40540468	1	OPPOSITE
1aC_NlaIII_SBONC6	es1	5 prime	8.741 kb	chr8	4887157	1	SAME
1aC_NlaIII_SBONC6	zgc:153126	3 prime	12.166 kb	chr10	21600969	1	SAME
1aC_NlaIII_SBONC6	zgc:110289	3 prime	10.568 kb	chr22	38125028	1	SAME
1aC_NlaIII_SBONC6	nr2f1a	5 prime	28.057 kb	chr5	50756945	1	OPPOSITE
1aC_NlaIII_SBONC6	gbx2	5 prime	71.838 kb	chr6	17339752	1	SAME
1aC_NlaIII_SBONC6	smyd1b	intron 6	within gene	chr8	1263829	1	SAME
1aC_NlaIII_SBONC6	nfat5	intron 1	within gene	chr25	38260904	1	SAME
1aC_NlaIII_SBONC6	zgc:76887	5 prime	30.358 kb	chr12	46641419	1	SAME
1aC_NlaIII_SBONC6				chr8	50702287	1
1aC_NlaIII_SBONC6	palm	5 prime	93.721 kb	chr11	13218563	1	OPPOSITE
1aC_NlaIII_SBONC6	cadm1b	intron 3	within gene	chr15	18752689	1	OPPOSITE
1aC_NlaIII_SBONC6	synpr	5 prime	64.527 kb	chr6	44871101	1	SAME
1aC_NlaIII_SBONC6	trpn1	3 prime	133.818 kb	chr19	1368751	1	OPPOSITE
1aC_NlaIII_SBONC6				chr9	45967459	1
1aC_NlaIII_SBONC6	antxr2b	intron 16	within gene	chr10	8608231	1	SAME
1aC_NlaIII_SBONC6				chr3	55237876	1
1aC_NlaIII_SBONC6				chr14	51801928	1
1aC_NlaIII_SBONC6	cxcl12b	5 prime	36.351 kb	chr22	27464815	1	SAME
1aC_NlaIII_SBONC6	zgc:158867	3 prime	89.590 kb	chr17	4203629	1	SAME
1aC_NlaIII_SBONC6	acads	intron 6	within gene	chr10	43081218	1	SAME
1aC_NlaIII_SBONC6	zgc:66241	intron 8	within gene	chr1	51145438	1	OPPOSITE
1aC_NlaIII_SBONC6	crh	5 prime	5.162 kb	chr24	24388136	1	OPPOSITE
1aC_NlaIII_SBONC6	isl1	3 prime	50.618 kb	chr5	39666299	1	OPPOSITE
1aC_NlaIII_SBONC6	zgc:171482	5 prime	36.876 kb	chr13	40227654	1	OPPOSITE
1aC_NlaIII_SBONC6				chr14	41471009	1
1aC_NlaIII_SBONC6	slc9a5	3 prime	60.414 kb	chr7	35051315	1	OPPOSITE
1aC_NlaIII_SBONC6	si:dkey-11e23.5	5 prime	17.853 kb	chr20	28663880	1	SAME
1aC_NlaIII_SBONC6	zgc:158381	5 prime	178.158 kb	chr6	29095100	1	OPPOSITE
1aC_NlaIII_SBONC6	zgc:153377	5 prime	46.724 kb	chr7	74796594	1	OPPOSITE
1aC_NlaIII_SBONC6				chr9	49636568	1
1aC_NlaIII_SBONC6	chl1a	5 prime	118.059 kb	chr23	10073998	1	OPPOSITE
1aC_NlaIII_SBONC6	ctdspl2b	3 prime	5.950 kb	chr7	31707946	1	SAME
1aC_NlaIII_SBONC6	LOC100002553	5 prime	13.232 kb	chr15	8614909	1	OPPOSITE
1aC_NlaIII_SBONC6	zgc:162251	3 prime	17.459 kb	chr8	4761551	1	SAME
1aC_NlaIII_SBONC6	klf7l	intron 3	within gene	chr9	28280560	1	SAME
1aC_NlaIII_SBONC6				chr11	22092804	1
1aC_NlaIII_SBONC6	zgc:110128	3 prime	52.456 kb	chr14	22861623	1	SAME
1aC_NlaIII_SBONC6	hk2	intron 6	within gene	chr5	15034439	1	OPPOSITE
1aC_NlaIII_SBONC6	gsk3b	5 prime	45.748 kb	chr9	9101546	1	OPPOSITE
1aC_NlaIII_SBONC6				chr7	72122685	1
1aC_NlaIII_SBONC6				chr23	9730510	1
1aC_NlaIII_SBONC6	zgc:85683	intron 5	within gene	chr8	41926312	1	SAME
1aC_NlaIII_SBONC6	lmo1	5 prime	53.526 kb	chr7	28439817	1	OPPOSITE
1aC_NlaIII_SBONC6				chr16	36163589	1
1aC_NlaIII_SBONC6				chr3	39404300	1
1aC_NlaIII_SBONC6	igf2bp2a	intron 2	within gene	chr9	12119078	1	OPPOSITE
1aC_NlaIII_SBONC6	zgc:64136	intron 7	within gene	chr7	19553055	1	SAME
1aC_NlaIII_SBONC6	creb1	3 prime	99.724 kb	chr1	33864769	1	OPPOSITE
1aC_NlaIII_SBONC6				chr6	54147594	1
1aC_NlaIII_SBONC6	arntl1b	5 prime	38.183 kb	chr7	69652839	1	SAME
1aC_NlaIII_SBONC6	hpca	intron 1	within gene	chr19	31850281	1	SAME
1aC_NlaIII_SBONC6	arl4a	3 prime	21.028 kb	chr15	33061527	1	SAME
1aC_NlaIII_SBONC6	runx2a	intron 3	within gene	chr17	5512342	1	SAME
1aC_NlaIII_SBONC6				chr12	22199393	1
1aC_NlaIII_SBONC6				chr20	6244352	1
1aC_NlaIII_SBONC6	manba	3 prime	83.709 kb	chr13	11577106	1	SAME
1aC_NlaIII_SBONC6	rdh12	intron 4	within gene	chr13	32558907	1	SAME
1aC_NlaIII_SBONC6	impa1	3 prime	37.822 kb	chr2	25420048	1	OPPOSITE
1aC_NlaIII_SBONC6				chr12	37653027	1
1aC_NlaIII_SBONC6	aqp10a	3 prime	8.126 kb	chr16	16940597	1	OPPOSITE
1aC_NlaIII_SBONC6	ak7	intron 3	within gene	chr20	4604903	1	OPPOSITE
1aC_NlaIII_SBONC6	zgc:100952	5 prime	64.770 kb	chr5	24628958	1	SAME
1aC_NlaIII_SBONC6	mylipa	3 prime	16.262 kb	chr19	25228844	1	OPPOSITE
1aC_NlaIII_SBONC6				chr5	72714797	1
1aC_NlaIII_SBONC6	her6	5 prime	66.364 kb	chr6	39857414	1	SAME
1aC_NlaIII_SBONC6				chr22	38451477	1
1aC_NlaIII_SBONC6	gss	3 prime	28.198 kb	chr23	14379991	1	SAME
1aC_NlaIII_SBONC6				chr18	36194746	1
1aC_NlaIII_SBONC6	tbx16	3 prime	57.353 kb	chr8	52640621	1	SAME
1aC_NlaIII_SBONC6	phf10	3 prime	18.079 kb	chr13	6326768	1	OPPOSITE
1aC_NlaIII_SBONC6	LOC100003647	3 prime	40.823 kb	chr2	51663918	1	SAME
1aC_NlaIII_SBONC6	rars	intron 13	within gene	chr21	37393453	1	OPPOSITE
1aC_NlaIII_SBONC6	zgc:153764	3 prime	28.919 kb	chr11	42832960	1	SAME
1aC_NlaIII_SBONC6	zgc:158270	3 prime	13.592 kb	chr11	43607327	1	OPPOSITE
1aC_NlaIII_SBONC6	zgc:92757	5 prime	84.146 kb	chr20	46392999	1	SAME
1aC_NlaIII_SBONC6	zfpm2b	5 prime	155.446 kb	chr19	45842219	1	SAME
1aC_NlaIII_SBONC6	neo1	intron 26	within gene	chr7	56118446	1	SAME
1aC_NlaIII_SBONC6				chr25	3120864	1
1aC_NlaIII_SBONC6	lrp5	5 prime	162.544 kb	chr25	10189994	1	OPPOSITE
1aC_NlaIII_SBONC6	zgc:153426	5 prime	75.919 kb	chr3	44280597	1	OPPOSITE
1aC_NlaIII_SBONC6	nfia	intron 10	within gene	chr22	16964157	1	OPPOSITE
1aC_NlaIII_SBONC6	itgbl1	3 prime	14.275 kb	chr9	32225741	1	SAME
1aC_NlaIII_SBONC6	zgc:154046	3 prime	140.260 kb	chr8	45819683	1	SAME
1aC_NlaIII_SBONC6	zgc:165653	intron 2	within gene	chr12	46357700	1	OPPOSITE
1aC_NlaIII_SBONC6				chr24	3849375	1
1aC_NlaIII_SBONC6	ms4a17a.16	3 prime	50.633 kb	chr4	71258751	1	OPPOSITE
1aC_NlaIII_SBONC6	ramp2	3 prime	86.934 kb	chr3	33878617	1	OPPOSITE
1aC_NlaIII_SBONC6	pls3	3 prime	6.278 kb	chr14	14019016	1	OPPOSITE
1aC_NlaIII_SBONC6	mxra8a	5 prime	47.498 kb	chr11	24272131	1	SAME
1aC_NlaIII_SBONC6	maf	5 prime	82.446 kb	chr18	30104154	1	OPPOSITE
1aC_NlaIII_SBONC6				chr7	41576534	1
1aC_NlaIII_SBONC6	osr1	intron 1	within gene	chr13	31641838	1	OPPOSITE
1aC_NlaIII_SBONC6	per1b	5 prime	55.830 kb	chr7	51621919	1	OPPOSITE
1aC_NlaIII_SBONC6	zgc:114109	3 prime	39.817 kb	chr3	33828182	1	OPPOSITE
1aC_NlaIII_SBONC6	gmppb	intron 1	within gene	chr22	39821803	1	SAME
1aC_NlaIII_SBONC6	zgc:163027	exon 14	within gene	chr4	71318106	1	SAME
1aC_NlaIII_SBONC6				chr3	5805357	1
1aC_NlaIII_SBONC6	lep	5 prime	21.651 kb	chr18	10620136	1	OPPOSITE
1aC_NlaIII_SBONC6				chr25	38118726	1
1aC_NlaIII_SBONC6	rps16	3 prime	26.959 kb	chr4	21418818	1	SAME
1aC_NlaIII_SBONC6	pcbd1	exon 2	within gene	chr13	26480385	1	SAME
1aC_NlaIII_SBONC6				chr6	5090429	1
1aC_NlaIII_SBONC6	si:dkey-7c18.10	3 prime	2.369 kb	chr20	45345511	1	SAME
1aC_NlaIII_SBONC6				chr21	14759251	1
1aC_NlaIII_SBONC6	MGC171407	5 prime	6.312 kb	chr23	35533223	1	SAME
1aC_NlaIII_SBONC6	si:dkey-81n9.1	3 prime	64.883 kb	chr18	7045081	1	SAME
1aC_NlaIII_SBONC6				chr1	3379175	1
1aC_NlaIII_SBONC6	slc4a1b	5 prime	53.860 kb	chr12	10721921	1	OPPOSITE
1aC_NlaIII_SBONC6	zgc:136870	5 prime	24.717 kb	chr2	39040622	1	SAME
1aC_NlaIII_SBONC6	cx30.9	5 prime	39.938 kb	chr19	36319378	1	SAME
1aC_NlaIII_SBONC6	rps9	5 prime	32.288 kb	chr16	44371001	1	OPPOSITE
1aC_NlaIII_SBONC6				chr22	38670697	1
1aC_NlaIII_SBONC6				chr7	9535630	1
1aC_NlaIII_SBONC6	si:ch211-113p18.5	3 prime	54.708 kb	chr15	12175740	1	OPPOSITE
1aC_NlaIII_SBONC6				chr23	2936760	1
1aC_NlaIII_SBONC6	pak2a	intron 13	within gene	chr2	34676381	1	OPPOSITE
1aC_NlaIII_SBONC6	col1a1b	3 prime	14.704 kb	chr12	2527840	1	OPPOSITE
1aC_NlaIII_SBONC6	ap2b1	3 prime	2.234 kb	chr5	62903271	1	SAME
1aC_NlaIII_SBONC6	rab43	intron 3	within gene	chr11	233327	1	OPPOSITE
1aC_NlaIII_SBONC6	zgc:91909	5 prime	10.505 kb	chr8	51962883	1	SAME
1aC_NlaIII_SBONC6	tdo2b	5 prime	18.955 kb	chr11	34246053	1	SAME
1aC_NlaIII_SBONC6	zgc:110586	intron 7	within gene	chr6	52645652	1	SAME
1aC_NlaIII_SBONC6	zgc:103418	5 prime	83.672 kb	chr20	36899657	1	SAME
1aC_NlaIII_SBONC6	acsl3a	intron 11	within gene	chr15	43614328	1	OPPOSITE
1aC_NlaIII_SBONC6	si:dkey-151c10.1	5 prime	87.474 kb	chr19	21389242	1	SAME
1aC_NlaIII_SBONC6	tpo	5 prime	103.468 kb	chr2	14038157	1	OPPOSITE
1aC_NlaIII_SBONC6	zgc:162161	3 prime	33.926 kb	chr20	3511972	1	SAME
1aC_NlaIII_SBONC6	zgc:158357	5 prime	53.869 kb	chr11	44003300	1	SAME
1aC_NlaIII_SBONC6	si:dkey-175c11.1	5 prime	64.882 kb	chr5	17626716	1	SAME
1aC_NlaIII_SBONC6	zgc:110116	3 prime	68.123 kb	chr21	4951792	1	OPPOSITE
1aC_NlaIII_SBONC6	zgc:163141	5 prime	31.773 kb	chr25	29790825	1	OPPOSITE
1aC_NlaIII_SBONC6	zgc:158252	5 prime	180.656 kb	chr6	8681760	1	OPPOSITE
1aC_NlaIII_SBONC6	zgc:158415	5 prime	48.965 kb	chr8	51761722	1	OPPOSITE
1aC_NlaIII_SBONC6	boc	3 prime	25.178 kb	chr24	20946596	1	SAME
1aC_NlaIII_SBONC6	her8a	3 prime	41.938 kb	chr7	26450569	1	SAME
1aC_NlaIII_SBONC6				chr15	40858158	1
1aC_NlaIII_SBONC6	zgc:110353	3 prime	39.928 kb	chr8	24979688	1	SAME
1aC_NlaIII_SBONC6	pacs2	intron 1	within gene	chr13	36764226	1	SAME
1aC_NlaIII_SBONC6	zgc:77304	3 prime	68.150 kb	chr18	46516576	1	SAME
1aC_NlaIII_SBONC6	zgc:171426	3 prime	81.073 kb	chr5	36185520	1	OPPOSITE
1aC_NlaIII_SBONC6				chr13	29845859	1
1aC_NlaIII_SBONC6	fam43b	3 prime	49.894 kb	chr23	42744152	1	SAME
1aC_NlaIII_SBONC6	adka	intron 7	within gene	chr13	25740084	1	SAME
1aC_NlaIII_SBONC6	tbxas1	3 prime	85.073 kb	chr18	12840714	1	SAME
1aC_NlaIII_SBONC6	myl2	5 prime	103.613 kb	chr8	4309444	1	OPPOSITE
1aC_NlaIII_SBONC6	tmem129	3 prime	7.983 kb	chr14	10053147	1	OPPOSITE
1aC_NlaIII_SBONC6	dlg5	intron 17	within gene	chr13	18075081	1	OPPOSITE
1aC_NlaIII_SBONC6	LOC556575	intron 1	within gene	chr1	8709414	1	OPPOSITE
1aC_NlaIII_SBONC6	epas1b	5 prime	76.071 kb	chr13	8128999	1	SAME
1aC_NlaIII_SBONC6	si:rp71-15d4.2	3 prime	35.859 kb	chr8	20399520	1	OPPOSITE
1aC_NlaIII_SBONC6	amfr	intron 6	within gene	chr25	37659982	1	OPPOSITE
1aC_NlaIII_SBONC6	zgc:153222	intron 1	within gene	chr2	2672223	1	SAME
1aC_NlaIII_SBONC6	sc:d173	5 prime	22.484 kb	chr16	23090926	1	OPPOSITE
1aC_NlaIII_SBONC6	zgc:172137	intron 19	within gene	chr7	34341109	1	OPPOSITE
1aC_NlaIII_SBONC6	si:ch211-199m3.9	intron 12	within gene	chr20	33733680	1	OPPOSITE
1aC_NlaIII_SBONC6	hist1h4l	5 prime	9.586 kb	chr25	35549363	1	OPPOSITE
1aC_NlaIII_SBONC6	mia3	intron 3	within gene	chr20	49686948	1	OPPOSITE
1aC_NlaIII_SBONC6	zgc:154141	intron 3	within gene	chr11	14790295	1	OPPOSITE
1aC_NlaIII_SBONC6	zgc:100927	5 prime	43.657 kb	chr17	10781895	1	SAME
1aC_NlaIII_SBONC6	tyw3	3 prime	12.902 kb	chr2	10724510	1	OPPOSITE
1aC_NlaIII_SBONC6	casp6l2	5 prime	26.006 kb	chr3	30308890	1	OPPOSITE
1aC_NlaIII_SBONC6	sult2st2	5 prime	37.786 kb	chr12	76761	1	SAME
1aC_NlaIII_SBONC6	zgc:112101	5 prime	18.591 kb	chr18	8574255	1	OPPOSITE
1aC_NlaIII_SBONC6				chr6	39258428	1
1aC_NlaIII_SBONC6	robo3	5 prime	34.607 kb	chr10	29605384	1	OPPOSITE
1aC_NlaIII_SBONC6	LOC100000800	3 prime	22.047 kb	chr17	41900054	1	OPPOSITE
1aC_NlaIII_SBONC6	zgc:101797	intron 1	within gene	chr15	33284739	1	OPPOSITE
1aC_NlaIII_SBONC6	irx4a	5 prime	24.916 kb	chr16	380550	1	SAME
1aC_NlaIII_SBONC6				chr4	68307808	1
1aC_NlaIII_SBONC6	plekho1	5 prime	11.054 kb	chr19	41683433	1	SAME
1aC_NlaIII_SBONC6	otof	intron 4	within gene	chr20	30845534	1	OPPOSITE
1aC_NlaIII_SBONC6				chr23	15911334	1
1aC_NlaIII_SBONC6	plxna3	intron 3	within gene	chr8	9231099	1	OPPOSITE
1aC_NlaIII_SBONC6				chr23	37166053	1
1aC_NlaIII_SBONC6	hs3st1l2	5 prime	87.098 kb	chr5	18992777	1	OPPOSITE
1aC_NlaIII_SBONC6	zgc:114079	3 prime	19.611 kb	chr11	5282326	1	SAME
1aC_NlaIII_SBONC6	zplxdc2	intron 13	within gene	chr7	43598374	1	SAME
1aC_NlaIII_SBONC6	trpv6	5 prime	70.325 kb	chr16	11284597	1	SAME
1aC_NlaIII_SBONC6	zgc:73275	intron 1	within gene	chr2	51196394	1	SAME
1aC_NlaIII_SBONC6				chr19	31252272	1
1aC_NlaIII_SBONC6	rps24	3 prime	66.003 kb	chr13	29795139	1	SAME
1aC_NlaIII_SBONC6				chr17	37272289	1
1aC_NlaIII_SBONC6	acss2	3 prime	90.524 kb	chr23	8022899	1	OPPOSITE
1aC_NlaIII_SBONC6	LOC566888	intron 1	within gene	chr15	32214700	1	SAME
1aC_NlaIII_SBONC6	zgc:162592	5 prime	96.114 kb	chr7	71801734	1	OPPOSITE
1aC_NlaIII_SBONC6				chr25	5725715	1
1aC_NlaIII_SBONC6	uts2b	5 prime	59.036 kb	chr11	40151596	1	OPPOSITE
1aC_NlaIII_SBONC6	si:dkey-19f23.3	5 prime	45.917 kb	chr22	17928292	1	SAME
1aC_NlaIII_SBONC6	appb	5 prime	50.238 kb	chr9	35436319	1	SAME
1aC_NlaIII_SBONC6	mef2cb	5 prime	18.636 kb	chr5	49253248	1	SAME
1aC_NlaIII_SBONC6	tbc1d7	5 prime	59.809 kb	chr20	48493857	1	OPPOSITE
1aC_NlaIII_SBONC6	zgc:195195	3 prime	81.569 kb	chr2	44237221	1	OPPOSITE
1aC_NlaIII_SBONC6	zgc:85858	3 prime	42.788 kb	chr23	42335913	1	SAME
1aC_NlaIII_SBONC6	xylt1	intron 1	within gene	chr3	23771610	1	SAME
1aC_NlaIII_SBONC6	ilf2	5 prime	86.353 kb	chr19	36834350	1	OPPOSITE
1aC_NlaIII_SBONC6				chr23	29884749	1
1aC_NlaIII_SBONC6	nkain4	intron 5	within gene	chr23	13934021	1	SAME
1aC_NlaIII_SBONC6	zgc:171544	intron 2	within gene	chr12	24524615	1	SAME
1aC_NlaIII_SBONC6	zgc:112352	intron 23	within gene	chr3	8797325	1	OPPOSITE
1aC_NlaIII_SBONC6	si:ch211-39f22.2	intron 1	within gene	chr13	18170096	1	OPPOSITE
1aC_NlaIII_SBONC6				chr15	28251172	1
1aC_NlaIII_SBONC6	ext1a	3 prime	7.352 kb	chr16	44301914	1	OPPOSITE
1aC_NlaIII_SBONC6	ddx55	3 prime	18.840 kb	chr10	3690787	1	SAME
1aC_NlaIII_SBONC6	txnl1	3 prime	47.621 kb	chr21	1142459	1	SAME
1aC_NlaIII_SBONC6	cyyr1	intron 8	within gene	chr1	57553177	1	OPPOSITE
1aC_NlaIII_SBONC6	smad1	intron 3	within gene	chr1	36917054	1	OPPOSITE
1aC_NlaIII_SBONC6	fgf20b	5 prime	4.753 kb	chr14	31719852	1	OPPOSITE
1aC_NlaIII_SBONC6	wnt11r	5 prime	21.715 kb	chr10	30173791	1	OPPOSITE
1aC_NlaIII_SBONC6	gnaia	3 prime	79.251 kb	chr25	21929169	1	OPPOSITE
1aC_NlaIII_SBONC6	irx3b	5 prime	38.640 kb	chr25	37836305	1	OPPOSITE
1aC_NlaIII_SBONC6	zgc:171915	intron 2	within gene	chr18	1534775	1	OPPOSITE
1aC_NlaIII_SBONC6	zgc:162651	3 prime	17.320 kb	chr7	17574457	1	OPPOSITE
1aC_NlaIII_SBONC6	zgc:66447	5 prime	0.825 kb	chr14	12540134	1	OPPOSITE
1aC_NlaIII_SBONC6	zgc:154067	intron 3	within gene	chr11	399365	1	SAME
1aC_NlaIII_SBONC6	rnf168	5 prime	83.065 kb	chr15	4273967	1	SAME
1aC_NlaIII_SBONC6	zgc:153165	5 prime	87.283 kb	chr3	52728876	1	OPPOSITE
1aC_NlaIII_SBONC6	zgc:162618	3 prime	33.027 kb	chr25	2514973	1	OPPOSITE
1aC_NlaIII_SBONC6	zgc:113383	3 prime	92.927 kb	chr13	46703405	1	OPPOSITE
1aC_NlaIII_SBONC6	f2	5 prime	12.450 kb	chr7	39155031	1	SAME
1aC_NlaIII_SBONC6	LOC100003595	intron 3	within gene	chr2	8364967	1	OPPOSITE
1aC_NlaIII_SBONC6				chr5	13723529	1
1aC_NlaIII_SBONC6				chr5	72711505	1
1aC_NlaIII_SBONC6	si:ch211-106n13.3	intron 13	within gene	chr2	50780052	1	SAME
1aC_NlaIII_SBONC6	fam46b	3 prime	11.432 kb	chr16	32974427	1	OPPOSITE
1aC_NlaIII_SBONC6	zgc:110234	3 prime	32.648 kb	chr18	44667367	1	OPPOSITE
1aC_NlaIII_SBONC6	pp2cb	5 prime	61.479 kb	chr13	10408361	1	OPPOSITE
1aC_NlaIII_SBONC6	rab5c	3 prime	13.085 kb	chr3	13770734	1	OPPOSITE
1aC_NlaIII_SBONC6	zgc:110306	intron 1	within gene	chr12	19364400	1	OPPOSITE
1aC_NlaIII_SBONC6	mak	intron 12	within gene	chr24	8540858	1	SAME
1aC_NlaIII_SBONC6	fgfrl1b	5 prime	62.299 kb	chr14	43906471	1	SAME
1aC_NlaIII_SBONC6	si:ch211-106h11.4	5 prime	25.053 kb	chr21	12825075	1	OPPOSITE
1aC_NlaIII_SBONC6	arid3a	intron 3	within gene	chr5	40419122	1	OPPOSITE
1aC_NlaIII_SBONC6				chr5	50645875	1
1aC_NlaIII_SBONC6	dct	5 prime	26.194 kb	chr9	52041646	1	SAME
1aC_NlaIII_SBONC6	si:ch211-207c7.1	3 prime	55.806 kb	chr22	23065794	1	OPPOSITE
1aC_NlaIII_SBONC6	wt1b	3 prime	108.708 kb	chr18	46101458	1	OPPOSITE
1aC_NlaIII_SBONC6	stat6	5 prime	58.391 kb	chr23	26625756	1	OPPOSITE
1aC_NlaIII_SBONC6	prph	intron 1	within gene	chr11	3184311	1	OPPOSITE
1aC_NlaIII_SBONC6	zgc:136239	intron 4	within gene	chr20	28979364	1	OPPOSITE
1aC_NlaIII_SBONC6	tlx2	5 prime	66.170 kb	chr14	5980068	1	SAME
1aC_NlaIII_SBONC6	cdca8	5 prime	36.337 kb	chr19	46466579	1	OPPOSITE
1aT_BfaI_SBONC6	scn1ba	3 prime	24.970 kb	chr16	40855313	46621	SAME
1aT_BfaI_SBONC6	bactin2	5 prime	0.027 kb	chr3	37652969	13380	OPPOSITE
1aT_BfaI_SBONC6	bactin2	intron 1	within gene	chr3	37652226	10454	OPPOSITE
1aT_BfaI_SBONC6				chr23	6814069	8559
1aT_BfaI_SBONC6				chr21	8023436	7731
1aT_BfaI_SBONC6				chr5	29335309	6866
1aT_BfaI_SBONC6	bactin2	intron 1	within gene	chr3	37651751	6260	SAME
1aT_BfaI_SBONC6				chr19	28026792	5000
1aT_BfaI_SBONC6				chr1	27461326	4380
1aT_BfaI_SBONC6	eif3ha	intron 1	within gene	chr16	44120971	4379	OPPOSITE
1aT_BfaI_SBONC6	si:dkey-76p14.4	3 prime	34.260 kb	chr11	23921720	4202	OPPOSITE
1aT_BfaI_SBONC6	atp2a2b	3 prime	48.149 kb	chr21	17844210	3541	OPPOSITE
1aT_BfaI_SBONC6	tspan18b	intron 3	within gene	chr18	28056948	3437	OPPOSITE
1aT_BfaI_SBONC6	b4galt6	intron 6	within gene	chr20	4371354	3386	SAME
1aT_BfaI_SBONC6	slc30a5	5 prime	50.621 kb	chr5	56187296	2985	SAME
1aT_BfaI_SBONC6	gyg1	3 prime	21.739 kb	chr2	23202378	2893	SAME
1aT_BfaI_SBONC6	wu:fd10a06	5 prime	60.871 kb	chr16	35830003	2842	SAME
1aT_BfaI_SBONC6	zgc:92907	5 prime	3.349 kb	chr14	32247600	2797	SAME
1aT_BfaI_SBONC6	tbx20	5 prime	27.670 kb	chr16	41979025	2786	SAME
1aT_BfaI_SBONC6	lnx1	intron 6	within gene	chr20	21976218	2526	OPPOSITE
1aT_BfaI_SBONC6				chr24	3618491	2465
1aT_BfaI_SBONC6				chr9	44360022	2309
1aT_BfaI_SBONC6	suv420h2	3 prime	114.398 kb	chr3	28160185	2207	OPPOSITE
1aT_BfaI_SBONC6	zgc:175096	5 prime	8.562 kb	chr16	23679986	1776	OPPOSITE
1aT_BfaI_SBONC6	prmt2	3 prime	31.882 kb	chr9	9256133	1766	OPPOSITE
1aT_BfaI_SBONC6				chr3	46264493	1706
1aT_BfaI_SBONC6	fbxl18	intron 3	within gene	chr1	6876013	1537	SAME
1aT_BfaI_SBONC6	si:ch211-235e18.3	5 prime	41.661 kb	chr9	7741046	1409	OPPOSITE
1aT_BfaI_SBONC6				chr3	45861005	908
1aT_BfaI_SBONC6	bactin2	5 prime	0.988 kb	chr3	37653930	848	SAME
1aT_BfaI_SBONC6	zgc:63489	5 prime	5.327 kb	chr10	2180210	793	OPPOSITE
1aT_BfaI_SBONC6	gss	exon 1	within gene	chr23	14408164	733	OPPOSITE
1aT_BfaI_SBONC6	sprn	5 prime	3.193 kb	chr13	22313473	629	OPPOSITE
1aT_BfaI_SBONC6	cdh11	5 prime	65.112 kb	chr7	51396672	617	OPPOSITE
1aT_BfaI_SBONC6				chr22	35961870	611
1aT_BfaI_SBONC6	hic1	intron 1	within gene	chr15	25987789	605	OPPOSITE
1aT_BfaI_SBONC6	slc25a32b	3 prime	43.967 kb	chr16	46217652	556	SAME
1aT_BfaI_SBONC6	zwi	exon 1	within gene	chr3	17773426	551	OPPOSITE
1aT_BfaI_SBONC6				chr14	38389275	506
1aT_BfaI_SBONC6				chr16	26854388	476
1aT_BfaI_SBONC6	zgc:171664	3 prime	32.078 kb	chr12	46111032	475	SAME
1aT_BfaI_SBONC6	eif3ha	intron 5	within gene	chr16	43989516	455	OPPOSITE
1aT_BfaI_SBONC6	cbln2b	5 prime	80.432 kb	chr24	14668079	453	SAME
1aT_BfaI_SBONC6	prmt2	3 prime	42.393 kb	chr9	9245622	448	SAME
1aT_BfaI_SBONC6				chr16	43698964	356
1aT_BfaI_SBONC6	zgc:110652	3 prime	1.739 kb	chr14	9000053	355	OPPOSITE
1aT_BfaI_SBONC6				chr3	25633623	336
1aT_BfaI_SBONC6	lamb4	intron 9	within gene	chr25	34458818	322	SAME
1aT_BfaI_SBONC6	pskh1	5 prime	39.609 kb	chr18	22146512	311	OPPOSITE
1aT_BfaI_SBONC6	scn1ba	3 prime	24.972 kb	chr16	40855315	307	SAME
1aT_BfaI_SBONC6	zgc:112433	3 prime	3.982 kb	chr8	3506940	298	OPPOSITE
1aT_BfaI_SBONC6	nadsyn1	3 prime	89.222 kb	chr7	68895113	268	OPPOSITE
1aT_BfaI_SBONC6	tmem176l.4	5 prime	2.757 kb	chr16	46042243	246	SAME
1aT_BfaI_SBONC6	LOC556864	intron 18	within gene	chr5	17403529	238	SAME
1aT_BfaI_SBONC6	efhc2	intron 7	within gene	chr9	34130721	222	OPPOSITE
1aT_BfaI_SBONC6	zgc:152651	3 prime	84.400 kb	chr7	53845758	202	SAME
1aT_BfaI_SBONC6	zgc:158375	intron 11	within gene	chr25	701819	190	OPPOSITE
1aT_BfaI_SBONC6				chr3	46264493	185
1aT_BfaI_SBONC6	zfpm2b	intron 4	within gene	chr19	45961461	183	SAME
1aT_BfaI_SBONC6	zgc:56538	intron 9	within gene	chr8	40392988	163	SAME
1aT_BfaI_SBONC6	slc25a32b	3 prime	43.965 kb	chr16	46217650	138	SAME
1aT_BfaI_SBONC6	si:dkey-12h3.1	intron 7	within gene	chr19	37006278	133	OPPOSITE
1aT_BfaI_SBONC6	tmtc4	3 prime	55.165 kb	chr9	31868587	114	SAME
1aT_BfaI_SBONC6	zgc:66433	3 prime	32.044 kb	chr14	22328700	108	SAME
1aT_BfaI_SBONC6	scn1ba	3 prime	25.012 kb	chr16	40855355	99	SAME
1aT_BfaI_SBONC6				chr25	3432696	87
1aT_BfaI_SBONC6	pcdh15a	intron 24	within gene	chr13	41854715	82	OPPOSITE
1aT_BfaI_SBONC6				chr10	32766236	73
1aT_BfaI_SBONC6	scn1ba	3 prime	24.969 kb	chr16	40855312	71	SAME
1aT_BfaI_SBONC6	ext1a	3 prime	3.763 kb	chr16	44298325	71	SAME
1aT_BfaI_SBONC6				chr16	34424542	71
1aT_BfaI_SBONC6	aplnrb	3 prime	48.181 kb	chr10	9073258	67	SAME
1aT_BfaI_SBONC6	scn1ba	3 prime	24.987 kb	chr16	40855330	65	SAME
1aT_BfaI_SBONC6	ext1c	5 prime	14.712 kb	chr19	47103359	63	OPPOSITE
1aT_BfaI_SBONC6	zgc:153498	intron 1	within gene	chr15	41053394	62	OPPOSITE
1aT_BfaI_SBONC6	zgc:92656	3 prime	23.434 kb	chr16	37797903	61	SAME
1aT_BfaI_SBONC6	zgc:171453	5 prime	79.952 kb	chr23	20528110	59	SAME
1aT_BfaI_SBONC6				chr5	5115594	47
1aT_BfaI_SBONC6	dacha	intron 1	within gene	chr21	36559864	45	OPPOSITE
1aT_BfaI_SBONC6				chr12	40072282	41
1aT_BfaI_SBONC6	rps9	5 prime	32.774 kb	chr16	44371487	39	OPPOSITE
1aT_BfaI_SBONC6	afmid	intron 3	within gene	chr11	43724785	38	SAME
1aT_BfaI_SBONC6	tmem39b	intron 6	within gene	chr13	32773681	36	SAME
1aT_BfaI_SBONC6	hsf2	5 prime	26.178 kb	chr20	40418342	36	SAME
1aT_BfaI_SBONC6	prmt2	3 prime	31.884 kb	chr9	9256131	35	OPPOSITE
1aT_BfaI_SBONC6	zgc:158234	3 prime	49.745 kb	chr10	25059667	33	OPPOSITE
1aT_BfaI_SBONC6	rbp4l	5 prime	18.853 kb	chr21	21647821	33	SAME
1aT_BfaI_SBONC6	zgc:153498	intron 1	within gene	chr15	41052552	32	OPPOSITE
1aT_BfaI_SBONC6	zgc:92907	5 prime	3.126 kb	chr14	32247377	32	SAME
1aT_BfaI_SBONC6	ftr02	3 prime	52.521 kb	chr2	41382013	31	SAME
1aT_BfaI_SBONC6				chr16	26854388	26
1aT_BfaI_SBONC6	si:ch211-255d18.4	5 prime	82.119 kb	chr11	6429107	26	OPPOSITE
1aT_BfaI_SBONC6	gyg1	3 prime	21.739 kb	chr2	23202378	26	OPPOSITE
1aT_BfaI_SBONC6				chr16	46304684	23
1aT_BfaI_SBONC6	upf1	intron 1	within gene	chr2	55583960	23	SAME
1aT_BfaI_SBONC6	zgc:172265	intron 12	within gene	chr16	27137845	22	SAME
1aT_BfaI_SBONC6	slc25a32b	3 prime	43.963 kb	chr16	46217648	21	SAME
1aT_BfaI_SBONC6	si:ch211-67e16.9	5 prime	80.747 kb	chr9	13766402	21	OPPOSITE
1aT_BfaI_SBONC6	zgc:153332	5 prime	0.009 kb	chr13	17460808	20	OPPOSITE
1aT_BfaI_SBONC6	pxn	intron 4	within gene	chr5	3718310	20	SAME
1aT_BfaI_SBONC6	zgc:73189	3 prime	16.330 kb	chr12	17744971	20	SAME
1aT_BfaI_SBONC6	zgc:173711	intron 4	within gene	chr4	56644806	20	SAME
1aT_BfaI_SBONC6				chr19	45636319	18
1aT_BfaI_SBONC6	zgc:114140	intron 10	within gene	chr16	6795861	18	OPPOSITE
1aT_BfaI_SBONC6	f9	5 prime	87.453 kb	chr14	33624431	17	OPPOSITE
1aT_BfaI_SBONC6	scn1ba	3 prime	25.003 kb	chr16	40855346	17	SAME
1aT_BfaI_SBONC6	hsf2	5 prime	26.180 kb	chr20	40418344	16	SAME
1aT_BfaI_SBONC6	dlgap5	exon 6	within gene	chr12	15844281	16	OPPOSITE
1aT_BfaI_SBONC6				chr1	27461326	16
1aT_BfaI_SBONC6	zgc:165627	5 prime	38.359 kb	chr3	53303192	16	SAME
1aT_BfaI_SBONC6	rxfp2	intron 1	within gene	chr10	31886699	15	SAME
1aT_BfaI_SBONC6	mir489	3 prime	37.936 kb	chr19	39877704	15	OPPOSITE
1aT_BfaI_SBONC6	LOC569861	5 prime	43.245 kb	chr25	12346684	15	SAME
1aT_BfaI_SBONC6	si:ch211-173p18.1	intron 8	within gene	chr19	38952042	15	SAME
1aT_BfaI_SBONC6	edar	intron 8	within gene	chr9	54313069	15	SAME
1aT_BfaI_SBONC6	dhrs3b	3 prime	120.851 kb	chr11	28385178	15	SAME
1aT_BfaI_SBONC6	cenpp	intron 6	within gene	chr22	12729667	15	OPPOSITE
1aT_BfaI_SBONC6	rhpn2	intron 14	within gene	chr7	38796231	14	OPPOSITE
1aT_BfaI_SBONC6	scn1ba	3 prime	24.971 kb	chr16	40855314	14	SAME
1aT_BfaI_SBONC6	por	3 prime	36.733 kb	chr10	33632019	14	OPPOSITE
1aT_BfaI_SBONC6	rufy2	intron 15	within gene	chr13	23558414	14	OPPOSITE
1aT_BfaI_SBONC6				chr17	38275224	14
1aT_BfaI_SBONC6	eps8l1	5 prime	55.850 kb	chr3	12638273	14	OPPOSITE
1aT_BfaI_SBONC6	si:dkeyp-86e4.1	intron 1	within gene	chr18	35643999	14	SAME
1aT_BfaI_SBONC6	zgc:92680	5 prime	4.568 kb	chr10	39477917	14	OPPOSITE
1aT_BfaI_SBONC6	ftr02	3 prime	52.521 kb	chr2	41382013	13	OPPOSITE
1aT_BfaI_SBONC6	LOC563823	3 prime	49.744 kb	chr5	49589245	13	OPPOSITE
1aT_BfaI_SBONC6	anks1b	intron 17	within gene	chr4	17751184	12	OPPOSITE
1aT_BfaI_SBONC6				chr14	15519957	12
1aT_BfaI_SBONC6				chr11	22092804	12
1aT_BfaI_SBONC6	zgc:92020	5 prime	99.561 kb	chr8	47403757	12	OPPOSITE
1aT_BfaI_SBONC6	brf1	5 prime	69.668 kb	chr20	24021413	12	SAME
1aT_BfaI_SBONC6	zgc:110602	intron 3	within gene	chr2	9379871	11	SAME
1aT_BfaI_SBONC6	slc25a32b	3 prime	43.969 kb	chr16	46217654	11	SAME
1aT_BfaI_SBONC6	bactin2	5 prime	0.026 kb	chr3	37652968	11	OPPOSITE
1aT_BfaI_SBONC6	zgc:175096	5 prime	8.561 kb	chr16	23679987	11	OPPOSITE
1aT_BfaI_SBONC6	fras1	intron 14	within gene	chr5	37662809	11	SAME
1aT_BfaI_SBONC6	tfr1a	intron 10	within gene	chr2	3454821	11	SAME
1aT_BfaI_SBONC6				chr20	17014743	11
1aT_BfaI_SBONC6	si:ch211-57i17.1	intron 7	within gene	chr20	44574166	10	OPPOSITE
1aT_BfaI_SBONC6				chr8	21960945	10
1aT_BfaI_SBONC6	galk2	3 prime	40.029 kb	chr25	27752728	10	SAME
1aT_BfaI_SBONC6	hsdl2	5 prime	66.457 kb	chr10	13279779	10	OPPOSITE
1aT_BfaI_SBONC6	atg9a	3 prime	52.874 kb	chr6	12276223	10	OPPOSITE
1aT_BfaI_SBONC6	gria1b	intron 2	within gene	chr21	28553561	10	OPPOSITE
1aT_BfaI_SBONC6	ralgps2	intron 9	within gene	chr20	14774112	10	OPPOSITE
1aT_BfaI_SBONC6				chr5	29335310	10
1aT_BfaI_SBONC6	nucb1	3 prime	13.538 kb	chr3	27521335	10	OPPOSITE
1aT_BfaI_SBONC6	slc25a26	3 prime	156.529 kb	chr11	16262013	10	OPPOSITE
1aT_BfaI_SBONC6				chr4	7673594	9
1aT_BfaI_SBONC6	atp1b1b	3 prime	59.499 kb	chr1	9496649	9	OPPOSITE
1aT_BfaI_SBONC6	galnt14	3 prime	40.763 kb	chr20	38049951	9	SAME
1aT_BfaI_SBONC6				chr14	5074392	9
1aT_BfaI_SBONC6	mrpl11	intron 1	within gene	chr14	31813471	9	OPPOSITE
1aT_BfaI_SBONC6	eif3ha	intron 1	within gene	chr16	44121424	9	OPPOSITE
1aT_BfaI_SBONC6	si:ch211-39a7.1	intron 5	within gene	chr19	8392717	9	OPPOSITE
1aT_BfaI_SBONC6				chr22	38714330	9
1aT_BfaI_SBONC6	cpsf3l	intron 12	within gene	chr23	43045143	8	SAME
1aT_BfaI_SBONC6	rps21	5 prime	70.694 kb	chr23	7801813	8	OPPOSITE
1aT_BfaI_SBONC6				chr17	37289483	8
1aT_BfaI_SBONC6				chr19	14884946	8
1aT_BfaI_SBONC6				chr12	37548859	8
1aT_BfaI_SBONC6	snap25a	intron 1	within gene	chr20	34815788	8	SAME
1aT_BfaI_SBONC6				chr7	3469882	8
1aT_BfaI_SBONC6	gpd1a	3 prime	22.672 kb	chr8	6939756	8	OPPOSITE
1aT_BfaI_SBONC6	oclna	intron 4	within gene	chr10	3000564	8	OPPOSITE
1aT_BfaI_SBONC6				chr1	25578452	8
1aT_BfaI_SBONC6	or128-5	3 prime	1.913 kb	chr15	5662701	8	SAME
1aT_BfaI_SBONC6	zgc:101761	intron 5	within gene	chr2	51387720	8	OPPOSITE
1aT_BfaI_SBONC6	ralba	5 prime	18.555 kb	chr9	37575784	8	SAME
1aT_BfaI_SBONC6	pcgf5b	intron 2	within gene	chr12	17235509	8	OPPOSITE
1aT_BfaI_SBONC6	arid3b	intron 4	within gene	chr25	30250852	8	SAME
1aT_BfaI_SBONC6	si:dkey-45k15.2	intron 5	within gene	chr13	7100333	8	SAME
1aT_BfaI_SBONC6				chr18	11206546	7
1aT_BfaI_SBONC6	ftr02	3 prime	29.407 kb	chr2	41358899	7	OPPOSITE
1aT_BfaI_SBONC6	zgc:172265	intron 12	within gene	chr16	27137846	7	OPPOSITE
1aT_BfaI_SBONC6	zgc:112964	3 prime	5.148 kb	chr12	41732375	7	SAME
1aT_BfaI_SBONC6				chr12	22179390	7
1aT_BfaI_SBONC6	stau1	5 prime	31.999 kb	chr6	49951572	7	OPPOSITE
1aT_BfaI_SBONC6	ccnd2a	5 prime	80.965 kb	chr25	14239001	7	SAME
1aT_BfaI_SBONC6	snx18b	5 prime	19.121 kb	chr10	8468864	7	OPPOSITE
1aT_BfaI_SBONC6	cyt1	5 prime	2.285 kb	chr19	4992035	7	OPPOSITE
1aT_BfaI_SBONC6				chr25	6224954	7
1aT_BfaI_SBONC6	hmg20a	5 prime	69.145 kb	chr25	6329901	7	SAME
1aT_BfaI_SBONC6	arfip2b	5 prime	54.443 kb	chr10	21690589	7	OPPOSITE
1aT_BfaI_SBONC6	mettl8	3 prime	19.722 kb	chr9	3920822	7	OPPOSITE
1aT_BfaI_SBONC6				chr7	37636143	7
1aT_BfaI_SBONC6	sav1	5 prime	13.282 kb	chr13	37092186	7	OPPOSITE
1aT_BfaI_SBONC6	osgepl1	intron 6	within gene	chr9	41301256	7	SAME
1aT_BfaI_SBONC6	lgi3	5 prime	0.916 kb	chr8	52343446	7	OPPOSITE
1aT_BfaI_SBONC6	si:rp71-15d4.2	3 prime	49.418 kb	chr8	20413079	7	SAME
1aT_BfaI_SBONC6	nudt1	5 prime	72.697 kb	chr3	39321516	6	OPPOSITE
1aT_BfaI_SBONC6	zgc:110694	3 prime	17.413 kb	chr8	18292752	6	OPPOSITE
1aT_BfaI_SBONC6				chr18	7153508	6
1aT_BfaI_SBONC6	ntm	intron 2	within gene	chr10	28590736	6	OPPOSITE
1aT_BfaI_SBONC6				chr17	27305511	6
1aT_BfaI_SBONC6				chr14	24409828	6
1aT_BfaI_SBONC6	med24	intron 8	within gene	chr12	11327616	6	SAME
1aT_BfaI_SBONC6	afmid	intron 3	within gene	chr11	43724785	6	OPPOSITE
1aT_BfaI_SBONC6	zgc:91896	5 prime	1.986 kb	chr25	17467777	6	SAME
1aT_BfaI_SBONC6	zgc:153102	3 prime	67.221 kb	chr11	4588631	6	OPPOSITE
1aT_BfaI_SBONC6	zgc:154027	5 prime	128.137 kb	chr7	76268208	6	SAME
1aT_BfaI_SBONC6				chr21	8023435	6
1aT_BfaI_SBONC6	scfd2	intron 2	within gene	chr20	22077096	6	SAME
1aT_BfaI_SBONC6				chr18	11267071	6
1aT_BfaI_SBONC6				chr21	8023434	6
1aT_BfaI_SBONC6	zgc:103517	intron 3	within gene	chr4	12067862	6	SAME
1aT_BfaI_SBONC6	slc43a1b	5 prime	4.711 kb	chr1	42244435	6	SAME
1aT_BfaI_SBONC6				chr3	55377681	6
1aT_BfaI_SBONC6	tcf3	3 prime	51.941 kb	chr2	57060516	6	OPPOSITE
1aT_BfaI_SBONC6	cenpp	intron 6	within gene	chr22	12729667	6	SAME
1aT_BfaI_SBONC6	zgc:171831	5 prime	71.735 kb	chr2	1625403	6	SAME
1aT_BfaI_SBONC6				chr15	17413060	5
1aT_BfaI_SBONC6	zgc:64133	5 prime	48.834 kb	chr10	31056116	5	SAME
1aT_BfaI_SBONC6	bactin2	intron 1	within gene	chr3	37651750	5	SAME
1aT_BfaI_SBONC6	her11	3 prime	16.635 kb	chr14	31771693	5	OPPOSITE
1aT_BfaI_SBONC6	fads2	3 prime	57.694 kb	chr25	3220681	5	SAME
1aT_BfaI_SBONC6				chr8	7988544	5
1aT_BfaI_SBONC6	mtr	intron 24	within gene	chr12	44097026	5	OPPOSITE
1aT_BfaI_SBONC6				chr5	29335227	5
1aT_BfaI_SBONC6	zgc:112964	3 prime	18.051 kb	chr12	41745278	5	OPPOSITE
1aT_BfaI_SBONC6	oor	3 prime	25.992 kb	chr5	26781808	5	SAME
1aT_BfaI_SBONC6	mir130c-2	5 prime	52.696 kb	chr5	10450199	5	SAME
1aT_BfaI_SBONC6				chr25	24214374	5
1aT_BfaI_SBONC6	rybpb	3 prime	38.516 kb	chr6	48096727	5	OPPOSITE
1aT_BfaI_SBONC6	tph1a	3 prime	25.793 kb	chr25	4348190	5	OPPOSITE
1aT_BfaI_SBONC6	adck1	intron 3	within gene	chr17	15304991	5	OPPOSITE
1aT_BfaI_SBONC6	rnps1	5 prime	15.794 kb	chr3	7984697	5	OPPOSITE
1aT_BfaI_SBONC6	bmpr1ba	5 prime	5.806 kb	chr5	4780286	5	OPPOSITE
1aT_BfaI_SBONC6	lss	intron 6	within gene	chr9	39271503	5	SAME
1aT_BfaI_SBONC6				chr1	10051362	5
1aT_BfaI_SBONC6	dclre1a	exon 2	within gene	chr12	26076949	5	OPPOSITE
1aT_BfaI_SBONC6	dock5	intron 50	within gene	chr8	6480765	5	OPPOSITE
1aT_BfaI_SBONC6	tfap2c	intron 1	within gene	chr23	35930874	5	SAME
1aT_BfaI_SBONC6	zgc:64072	intron 2	within gene	chr1	348741	5	SAME
1aT_BfaI_SBONC6				chr5	14028744	5
1aT_BfaI_SBONC6	zgc:136380	3 prime	82.857 kb	chr3	57928830	5	OPPOSITE
1aT_BfaI_SBONC6	capza1a	intron 7	within gene	chr6	51928627	5	OPPOSITE
1aT_BfaI_SBONC6				chr21	31601383	5
1aT_BfaI_SBONC6				chr7	41523399	5
1aT_BfaI_SBONC6				chr1	27461324	5
1aT_BfaI_SBONC6	zgc:162187	5 prime	46.483 kb	chr12	17491687	5	SAME
1aT_BfaI_SBONC6	nfil3	5 prime	24.406 kb	chr10	5645628	5	SAME
1aT_BfaI_SBONC6	si:dkey-76p14.4	3 prime	34.259 kb	chr11	23921721	5	OPPOSITE
1aT_BfaI_SBONC6				chr24	1558085	5
1aT_BfaI_SBONC6	zgc:198241	intron 3	within gene	chr15	24789372	5	OPPOSITE
1aT_BfaI_SBONC6	ccdc153	3 prime	48.451 kb	chr15	23293064	5	SAME
1aT_BfaI_SBONC6	mmadhc	5 prime	11.003 kb	chr9	22399026	5	SAME
1aT_BfaI_SBONC6	flcn	intron 6	within gene	chr16	12540209	5	SAME
1aT_BfaI_SBONC6				chr5	50267535	5
1aT_BfaI_SBONC6	pdcd8	3 prime	31.459 kb	chr5	19672599	4	OPPOSITE
1aT_BfaI_SBONC6				chr10	22962915	4
1aT_BfaI_SBONC6	zgc:158328	3 prime	39.480 kb	chr15	36313958	4	OPPOSITE
1aT_BfaI_SBONC6	evx2	3 prime	19.874 kb	chr23	41100254	4	SAME
1aT_BfaI_SBONC6	zgc:85717	5 prime	3.149 kb	chr19	28735650	4	OPPOSITE
1aT_BfaI_SBONC6	fhla	3 prime	56.358 kb	chr14	32997455	4	OPPOSITE
1aT_BfaI_SBONC6	bmp8	5 prime	37.780 kb	chr19	34360305	4	OPPOSITE
1aT_BfaI_SBONC6				chr16	5188547	4
1aT_BfaI_SBONC6	zgc:77655	5 prime	62.304 kb	chr20	15354091	4	SAME
1aT_BfaI_SBONC6	acad11	intron 14	within gene	chr24	11114555	4	OPPOSITE
1aT_BfaI_SBONC6				chr25	10947232	4
1aT_BfaI_SBONC6	eif3ha	intron 1	within gene	chr16	44121370	4	OPPOSITE
1aT_BfaI_SBONC6	zgc:136585	5 prime	1.815 kb	chr2	42223893	4	SAME
1aT_BfaI_SBONC6				chr8	10488079	4
1aT_BfaI_SBONC6				chr16	34362218	4
1aT_BfaI_SBONC6	cdh17	3 prime	5.714 kb	chr16	25453969	4	OPPOSITE
1aT_BfaI_SBONC6	zgc:110130	5 prime	62.470 kb	chr2	11310814	4	OPPOSITE
1aT_BfaI_SBONC6	bactin2	5 prime	0.028 kb	chr3	37652970	4	OPPOSITE
1aT_BfaI_SBONC6	aacs	intron 12	within gene	chr5	16865339	4	OPPOSITE
1aT_BfaI_SBONC6	zgc:92018	intron 1	within gene	chr23	3404776	4	SAME
1aT_BfaI_SBONC6	phlda2	3 prime	23.612 kb	chr25	24530562	4	SAME
1aT_BfaI_SBONC6	tprb	intron 41	within gene	chr20	33943071	4	SAME
1aT_BfaI_SBONC6	myom1a	intron 9	within gene	chr2	28889399	4	SAME
1aT_BfaI_SBONC6	coro1a	5 prime	32.859 kb	chr3	28360316	4	OPPOSITE
1aT_BfaI_SBONC6	parp3	5 prime	41.503 kb	chr6	45732236	4	OPPOSITE
1aT_BfaI_SBONC6	dync1li1	5 prime	97.818 kb	chr19	13341728	4	OPPOSITE
1aT_BfaI_SBONC6	rad23a	intron 7	within gene	chr1	51992383	4	SAME
1aT_BfaI_SBONC6	acot7	intron 8	within gene	chr8	48093486	4	OPPOSITE
1aT_BfaI_SBONC6	lama5	5 prime	2.013 kb	chr23	8414646	4	SAME
1aT_BfaI_SBONC6	ek3	intron 2	within gene	chr2	7315466	4	SAME
1aT_BfaI_SBONC6	kifap3	3 prime	9.173 kb	chr2	21111090	4	SAME
1aT_BfaI_SBONC6				chr1	49662363	4
1aT_BfaI_SBONC6	atp2a2b	3 prime	48.150 kb	chr21	17844211	4	OPPOSITE
1aT_BfaI_SBONC6	mad1l1	intron 7	within gene	chr1	8375161	4	OPPOSITE
1aT_BfaI_SBONC6	tab3	exon 4	within gene	chr8	18868245	4	SAME
1aT_BfaI_SBONC6				chr23	6814070	4
1aT_BfaI_SBONC6				chr21	8023437	4
1aT_BfaI_SBONC6	si:dkey-174n20.1	3 prime	68.289 kb	chr5	18935258	4	OPPOSITE
1aT_BfaI_SBONC6	zgc:136925	3 prime	107.267 kb	chr15	5306956	4	SAME
1aT_BfaI_SBONC6				chr19	28026791	4
1aT_BfaI_SBONC6	rfx2	intron 10	within gene	chr8	20450428	4	OPPOSITE
1aT_BfaI_SBONC6				chr13	49315193	4
1aT_BfaI_SBONC6	si:dkey-72l14.9	intron 1	within gene	chr8	26607467	4	OPPOSITE
1aT_BfaI_SBONC6	roraa	3 prime	29.316 kb	chr25	35231898	4	OPPOSITE
1aT_BfaI_SBONC6	miox	5 prime	12.345 kb	chr18	7719797	4	OPPOSITE
1aT_BfaI_SBONC6	pvalb6	3 prime	40.947 kb	chr3	21442050	4	SAME
1aT_BfaI_SBONC6	acads	intron 6	within gene	chr10	43081218	4	OPPOSITE
1aT_BfaI_SBONC6				chr18	9917142	4
1aT_BfaI_SBONC6	strada	intron 3	within gene	chr3	29159146	4	OPPOSITE
1aT_BfaI_SBONC6	sec31a	intron 21	within gene	chr10	5321001	4	SAME
1aT_BfaI_SBONC6	scn1ba	3 prime	24.968 kb	chr16	40855311	4	SAME
1aT_BfaI_SBONC6	LOC100151049	intron 1	within gene	chr19	42517361	4	SAME
1aT_BfaI_SBONC6	si:dkey-195c14.1	5 prime	42.759 kb	chr19	20730971	4	SAME
1aT_BfaI_SBONC6				chr9	24006224	4
1aT_BfaI_SBONC6	cutl1	3 prime	25.228 kb	chr15	13770739	4	SAME
1aT_BfaI_SBONC6	gtpbp4	3 prime	61.316 kb	chr2	41400655	4	OPPOSITE
1aT_BfaI_SBONC6	ap1g1	3 prime	89.826 kb	chr7	73126417	4	SAME
1aT_BfaI_SBONC6				chr7	54496492	4
1aT_BfaI_SBONC6	c1galt1a	3 prime	5.564 kb	chr23	27595259	3	SAME
1aT_BfaI_SBONC6	zgc:153222	intron 1	within gene	chr2	2672223	3	OPPOSITE
1aT_BfaI_SBONC6	itgb1b.2	exon 13	within gene	chr2	42685555	3	OPPOSITE
1aT_BfaI_SBONC6	zgc:112435	3 prime	9.749 kb	chr6	61076595	3	OPPOSITE
1aT_BfaI_SBONC6	zgc:154013	intron 9	within gene	chr8	50282078	3	OPPOSITE
[truncated: 10,344 more rows]

## Sheet: all sites BaSB11 transgene
All reads from bactin:SB11 ; T2/OncZ double transgenic fish.
Left (# IRL reads) and Right (#IRR reads) side reads merged
Sample ID	gene	position	distance from gene	chromosome	base position	# IRL reads	# IRR reads	orientation relative to gene
1BaSB11_SBONC6	grk1a	intron 1	within gene	chr1	120401	81		SAME
1BaSB11_SBONC6	zgc:92834	5 prime	66.911 kb	chr1	952348	1		OPPOSITE		1BaSB11_SBONC6 = 1C
1BaSB11_SBONC6	runx1	intron 3	within gene	chr1	1058915		23	OPPOSITE		2BaSB11_SBONC6 = 2C
1BaSB11_SBONC6	runx1	intron 3	within gene	chr1	1293129	10		SAME		3BaSB11_SBONC6 = 3C
1BaSB11_SBONC6				chr1	1467286	1				5BaSB11_SBONC6 = 5C
1BaSB11_SBONC6				chr1	1495254	1				2T_SBONC6 = 2T
1BaSB11_SBONC6	LOC100001008	intron 1	within gene	chr1	1697437		1	SAME		8T_SBONC6 = 8T
1BaSB11_SBONC6	zgc:171629	5 prime	60.811 kb	chr1	1808968		31	OPPOSITE
1BaSB11_SBONC6	mbnl2	intron 3	within gene	chr1	2501896	975		OPPOSITE
1BaSB11_SBONC6	usp14	intron 8	within gene	chr1	3023494	2		OPPOSITE
1BaSB11_SBONC6	usp14	3 prime	33.472 kb	chr1	3062953		1	OPPOSITE
1BaSB11_SBONC6	zgc:171629	3 prime	13.588 kb	chr1	3224733	454		OPPOSITE
1BaSB11_SBONC6	zgc:171629	3 prime	16.866 kb	chr1	3228011	1		OPPOSITE
1BaSB11_SBONC6	zgc:171629	3 prime	28.458 kb	chr1	3239603	1		SAME
1BaSB11_SBONC6	zgc:171629	3 prime	30.277 kb	chr1	3241422	1		SAME
1BaSB11_SBONC6	zgc:171629	3 prime	31.035 kb	chr1	3242180	6	1	OPPOSITE
1BaSB11_SBONC6	zgc:112393	3 prime	74.993 kb	chr1	3982817		4	SAME
1BaSB11_SBONC6	LOC100005630	3 prime	12.854 kb	chr1	4393886	1		OPPOSITE
1BaSB11_SBONC6	klf7	3 prime	165.065 kb	chr1	4770790	919		OPPOSITE
1BaSB11_SBONC6	klf7	5 prime	41.223 kb	chr1	4977078	2		SAME
1BaSB11_SBONC6	si:ch211-93g23.2	5 prime	52.405 kb	chr1	5064027	1		OPPOSITE
1BaSB11_SBONC6	lancl1	5 prime	30.321 kb	chr1	5498981	3		OPPOSITE
1BaSB11_SBONC6	lancl1	intron 1	within gene	chr1	5508125	1		SAME
1BaSB11_SBONC6	efnb2b	5 prime	77.497 kb	chr1	5726658		2	OPPOSITE
1BaSB11_SBONC6	zgc:109892	3 prime	79.692 kb	chr1	6278558	1		OPPOSITE
1BaSB11_SBONC6	zgc:112980	intron 12	within gene	chr1	6781097	1		OPPOSITE
1BaSB11_SBONC6	zgc:112980	5 prime	16.797 kb	chr1	6804055	1		SAME
1BaSB11_SBONC6	tlr2	3 prime	7.946 kb	chr1	7277872	1		SAME
1BaSB11_SBONC6	fam134a	intron 7	within gene	chr1	7964387	1		SAME
1BaSB11_SBONC6				chr1	8090470	1
1BaSB11_SBONC6	pdia2	3 prime	3.859 kb	chr1	8592074		1	SAME
1BaSB11_SBONC6	trpc5	intron 2	within gene	chr1	9242123		75	SAME
1BaSB11_SBONC6	atp1b1b	3 prime	21.820 kb	chr1	9458970		1	OPPOSITE
1BaSB11_SBONC6	dmd	intron 11	within gene	chr1	9570678		1	OPPOSITE
1BaSB11_SBONC6	zgc:195152	5 prime	41.120 kb	chr1	9880235	1		OPPOSITE
1BaSB11_SBONC6	zgc:195152	3 prime	23.164 kb	chr1	9944519	409		OPPOSITE
1BaSB11_SBONC6	zgc:136845	3 prime	83.816 kb	chr1	10411556	4		OPPOSITE
1BaSB11_SBONC6	zgc:77739	3 prime	47.727 kb	chr1	11740436	1		SAME
1BaSB11_SBONC6				chr1	12056024	1
1BaSB11_SBONC6	camk2d2	3 prime	121.731 kb	chr1	13229291	1		SAME
1BaSB11_SBONC6				chr1	14919476	260
1BaSB11_SBONC6	tusc3	intron 3	within gene	chr1	15477719		3	OPPOSITE
1BaSB11_SBONC6	zgc:112426	intron 3	within gene	chr1	16094938		1	SAME
1BaSB11_SBONC6				chr1	16405546		11
1BaSB11_SBONC6				chr1	16648237	1	1
1BaSB11_SBONC6	tlr3	5 prime	64.159 kb	chr1	17244490	6		OPPOSITE
1BaSB11_SBONC6	mtnr1aa	intron 1	within gene	chr1	17678219	1		OPPOSITE
1BaSB11_SBONC6	klf3	5 prime	67.133 kb	chr1	18096604	1		OPPOSITE
1BaSB11_SBONC6	zgc:165626	intron 13	within gene	chr1	18592800	1		SAME
1BaSB11_SBONC6	tyrp1b	5 prime	27.328 kb	chr1	18733219		1	OPPOSITE
1BaSB11_SBONC6	lap3	intron 6	within gene	chr1	18840174	4		OPPOSITE
1BaSB11_SBONC6	mettl14	3 prime	88.701 kb	chr1	19412472		1	SAME
1BaSB11_SBONC6	mettl14	3 prime	88.699 kb	chr1	19412474	13	2868	SAME
1BaSB11_SBONC6	mettl14	5 prime	92.646 kb	chr1	19593819	8		OPPOSITE
1BaSB11_SBONC6	zgc:136652	3 prime	46.695 kb	chr1	20028181	2		OPPOSITE
1BaSB11_SBONC6	sc4mol	5 prime	1.980 kb	chr1	20468821	1		SAME
1BaSB11_SBONC6	sc4mol	5 prime	91.048 kb	chr1	20557889	1		OPPOSITE
1BaSB11_SBONC6	gria2a	5 prime	59.101 kb	chr1	21010138		1	OPPOSITE
1BaSB11_SBONC6	chrnb3a	5 prime	5.076 kb	chr1	21949283	1		OPPOSITE
1BaSB11_SBONC6	LOC557028	5 prime	32.836 kb	chr1	22944826	1		OPPOSITE
1BaSB11_SBONC6	tmem41ab	intron 4	within gene	chr1	22984470	4		SAME
1BaSB11_SBONC6	vps8	5 prime	69.877 kb	chr1	23421855		1	SAME
1BaSB11_SBONC6	lig4	3 prime	54.051 kb	chr1	24155872	1206		OPPOSITE
1BaSB11_SBONC6	lig4	3 prime	54.049 kb	chr1	24155874	1		OPPOSITE
1BaSB11_SBONC6	ankrd10a	5 prime	53.264 kb	chr1	24368743	2	1	SAME
1BaSB11_SBONC6				chr1	25145946	1539
1BaSB11_SBONC6				chr1	25167030		1
1BaSB11_SBONC6				chr1	25568687	2
1BaSB11_SBONC6	zgc:101017	3 prime	14.964 kb	chr1	25751404		1	SAME
1BaSB11_SBONC6	zgc:101017	3 prime	33.479 kb	chr1	25769919	73		OPPOSITE
1BaSB11_SBONC6	arfip1	3 prime	48.075 kb	chr1	25960053	2		OPPOSITE
1BaSB11_SBONC6	arfip1	3 prime	48.073 kb	chr1	25960055	21		OPPOSITE
1BaSB11_SBONC6	arfip1	3 prime	48.071 kb	chr1	25960057	1		OPPOSITE
1BaSB11_SBONC6	zgc:77713	5 prime	2.959 kb	chr1	27100554	1		OPPOSITE
1BaSB11_SBONC6	slit2	5 prime	245.442 kb	chr1	27566476	1		SAME
1BaSB11_SBONC6	slit2	3 prime	11.987 kb	chr1	27823905		1	SAME
1BaSB11_SBONC6	slit2	3 prime	12.952 kb	chr1	27824870		6	SAME
1BaSB11_SBONC6	psip1	3 prime	139.580 kb	chr1	28001785		1	SAME
1BaSB11_SBONC6	psip1	3 prime	129.684 kb	chr1	28011681	13		SAME
1BaSB11_SBONC6	psip1	intron 8	within gene	chr1	28100693	6		OPPOSITE
1BaSB11_SBONC6	snapc3	5 prime	5.161 kb	chr1	28307761		1	OPPOSITE
1BaSB11_SBONC6	zgc:77715	3 prime	16.839 kb	chr1	28826837	4		OPPOSITE
1BaSB11_SBONC6				chr1	29062179	1
1BaSB11_SBONC6	coro2a	intron 7	within gene	chr1	29212107	4		OPPOSITE
1BaSB11_SBONC6				chr1	29509127	1
1BaSB11_SBONC6	bnc2	5 prime	156.171 kb	chr1	29615042	1	1	SAME
1BaSB11_SBONC6	bnc2	3 prime	0.676 kb	chr1	29771889	13		SAME
1BaSB11_SBONC6				chr1	30108486	1
1BaSB11_SBONC6	zgc:153638	3 prime	13.065 kb	chr1	30490994	3		SAME
1BaSB11_SBONC6	zgc:103668	5 prime	36.559 kb	chr1	30657397	3		SAME
1BaSB11_SBONC6	zgc:103668	5 prime	38.550 kb	chr1	30659388	3		OPPOSITE
1BaSB11_SBONC6				chr1	30827952	2
1BaSB11_SBONC6	as3mt	3 prime	24.964 kb	chr1	31664159	1		SAME
1BaSB11_SBONC6	hdhd1a	3 prime	141.716 kb	chr1	32227516		13	SAME
1BaSB11_SBONC6	nlgn4b	5 prime	338.118 kb	chr1	32479835		1	SAME
1BaSB11_SBONC6	tfap2c	intron 1	within gene	chr1	33048083		1	SAME
1BaSB11_SBONC6	tfap2c	3 prime	16.651 kb	chr1	33068604	1		OPPOSITE
1BaSB11_SBONC6				chr1	33191653	2
1BaSB11_SBONC6	LOC100004819	5 prime	16.474 kb	chr1	34025479	14		SAME
1BaSB11_SBONC6	zgc:109983	intron 5	within gene	chr1	34125350		2	OPPOSITE
1BaSB11_SBONC6	scpp1	3 prime	50.764 kb	chr1	35458963	1	2	SAME
1BaSB11_SBONC6	nr3c2	5 prime	152.847 kb	chr1	35719819		2	OPPOSITE
1BaSB11_SBONC6	nr3c2	intron 3	within gene	chr1	35827023	78		SAME
1BaSB11_SBONC6	ednra	intron 3	within gene	chr1	36100876	2		SAME
1BaSB11_SBONC6	ednra	5 prime	86.132 kb	chr1	36204677		1	OPPOSITE
1BaSB11_SBONC6	pou4f2	3 prime	19.677 kb	chr1	36367832		1	OPPOSITE
1BaSB11_SBONC6				chr1	36515183		1
1BaSB11_SBONC6	lsm6	3 prime	43.258 kb	chr1	36586461	1		SAME
1BaSB11_SBONC6	lsm6	5 prime	35.636 kb	chr1	36665355		1	OPPOSITE
1BaSB11_SBONC6	hhip	5 prime	62.682 kb	chr1	37097115		1	OPPOSITE
1BaSB11_SBONC6	LOC568915	intron 4	within gene	chr1	38415143	4		SAME
1BaSB11_SBONC6	LOC568915	intron 1	within gene	chr1	38599161	5		SAME
1BaSB11_SBONC6	naa15b	3 prime	3.652 kb	chr1	38822843	1		SAME
1BaSB11_SBONC6	zgc:56493	3 prime	49.570 kb	chr1	39194438		2	OPPOSITE
1BaSB11_SBONC6	faah2a	intron 9	within gene	chr1	39256535	1		SAME
1BaSB11_SBONC6	zgc:194443	3 prime	20.638 kb	chr1	39338321		1	SAME
1BaSB11_SBONC6	odz3	5 prime	50.397 kb	chr1	40054514	1		OPPOSITE
1BaSB11_SBONC6	zgc:153720	intron 1	within gene	chr1	40123141	1		SAME
1BaSB11_SBONC6	mir2197	5 prime	0.141 kb	chr1	40174382	933		OPPOSITE
1BaSB11_SBONC6	mir2197	5 prime	0.127 kb	chr1	40174396		1	OPPOSITE
1BaSB11_SBONC6	hmx4	3 prime	42.295 kb	chr1	40906742	3		SAME
1BaSB11_SBONC6	hmx4	exon 1	within gene	chr1	40948789		2	OPPOSITE
1BaSB11_SBONC6	zgc:73265	3 prime	87.731 kb	chr1	41597111	1		OPPOSITE
1BaSB11_SBONC6	ddx39a	5 prime	17.535 kb	chr1	42770088	1		SAME
1BaSB11_SBONC6	zgc:101679	intron 7	within gene	chr1	42862849		1	SAME
1BaSB11_SBONC6	LOC559976	intron 2	within gene	chr1	42991917	1		SAME
1BaSB11_SBONC6	2010-09-03	5 prime	2.150 kb	chr1	43162102	1	1	OPPOSITE
1BaSB11_SBONC6	si:ch211-214c7.5	5 prime	3.457 kb	chr1	43281464	1	8	SAME
1BaSB11_SBONC6	si:ch211-214c7.5	5 prime	60.550 kb	chr1	43338557	65		OPPOSITE
1BaSB11_SBONC6	zgc:152851	5 prime	2.058 kb	chr1	43447941		3	SAME
1BaSB11_SBONC6	rnf24	3 prime	99.420 kb	chr1	43766445	1		SAME
1BaSB11_SBONC6				chr1	44097488	1
1BaSB11_SBONC6	ctnna2	intron 5	within gene	chr1	44588485	10		SAME
1BaSB11_SBONC6	ctnna2	intron 5	within gene	chr1	44812805	1		SAME
1BaSB11_SBONC6	ctnna2	intron 5	within gene	chr1	44872022	1		SAME
1BaSB11_SBONC6				chr1	45568831	8
1BaSB11_SBONC6	zgc:66472	5 prime	81.683 kb	chr1	46151780		9	OPPOSITE
1BaSB11_SBONC6	sox1b	5 prime	47.875 kb	chr1	46288348	1		SAME
1BaSB11_SBONC6	sox1b	5 prime	38.278 kb	chr1	46297945		1	SAME
1BaSB11_SBONC6	kpna3	intron 6	within gene	chr1	46818838	1		SAME
1BaSB11_SBONC6	mir15a-1	5 prime	10.916 kb	chr1	46873738	1		SAME
1BaSB11_SBONC6	mir15a-1	5 prime	11.624 kb	chr1	46874446		1	SAME
1BaSB11_SBONC6	cx41.8	intron 2	within gene	chr1	47377361	1199		SAME
1BaSB11_SBONC6	cx41.8	intron 1	within gene	chr1	47481322		5	SAME
1BaSB11_SBONC6	zgc:64174	3 prime	19.206 kb	chr1	47884562	2		OPPOSITE
1BaSB11_SBONC6	sh3pxd2a	intron 5	within gene	chr1	48003746		779	SAME
1BaSB11_SBONC6	zgc:152952	3 prime	74.991 kb	chr1	48366674		1	SAME
1BaSB11_SBONC6	pdcd11	intron 26	within gene	chr1	48624380	1		SAME
1BaSB11_SBONC6	pdcd11	intron 9	within gene	chr1	48649245	1		OPPOSITE
1BaSB11_SBONC6	LOC557882	intron 9	within gene	chr1	48720602	1		SAME
1BaSB11_SBONC6	si:ch73-6k14.1	5 prime	50.029 kb	chr1	48821625	101		SAME
1BaSB11_SBONC6				chr1	49056266	1
1BaSB11_SBONC6				chr1	49157699	1
1BaSB11_SBONC6				chr1	49375057	1
1BaSB11_SBONC6				chr1	49662364	7	2
1BaSB11_SBONC6				chr1	49662414	1951
1BaSB11_SBONC6	lef1	5 prime	160.438 kb	chr1	49712889	139		OPPOSITE
1BaSB11_SBONC6	lef1	exon 11	within gene	chr1	49872952	1		OPPOSITE
1BaSB11_SBONC6	cyp2u1	exon 4	within gene	chr1	49896024	3		OPPOSITE
1BaSB11_SBONC6	gstcd	3 prime	6.861 kb	chr1	50042306	1		OPPOSITE
1BaSB11_SBONC6	npnt	intron 1	within gene	chr1	50074981	1		SAME
1BaSB11_SBONC6	npnt	intron 1	within gene	chr1	50075791	1		OPPOSITE
1BaSB11_SBONC6	tbck	intron 22	within gene	chr1	50176681	1	1	SAME
1BaSB11_SBONC6	tbck	intron 19	within gene	chr1	50224151	3		OPPOSITE
1BaSB11_SBONC6	si:ch73-190m4.3	3 prime	22.156 kb	chr1	50683538		1	OPPOSITE
1BaSB11_SBONC6	zgc:154142	intron 3	within gene	chr1	50800180		29	SAME
1BaSB11_SBONC6	zgc:154142	intron 3	within gene	chr1	50800652	1		SAME
1BaSB11_SBONC6	mdh1a	intron 6	within gene	chr1	50959772	2		OPPOSITE
1BaSB11_SBONC6	zgc:66241	3 prime	42.459 kb	chr1	51195792		1	SAME
1BaSB11_SBONC6	jag1a	intron 13	within gene	chr1	51233047	1		OPPOSITE
1BaSB11_SBONC6	meis4.1a	5 prime	35.768 kb	chr1	51355177		1	OPPOSITE
1BaSB11_SBONC6	zgc:165656	5 prime	51.691 kb	chr1	51496328		1	SAME
1BaSB11_SBONC6	zgc:165656	5 prime	23.068 kb	chr1	51524951		126	SAME
1BaSB11_SBONC6	cha	3 prime	64.867 kb	chr1	51813387	1		OPPOSITE
1BaSB11_SBONC6	asna1	3 prime	21.193 kb	chr1	52049680	66		SAME
1BaSB11_SBONC6	zgc:162591	5 prime	2.897 kb	chr1	52089987		2	OPPOSITE
1BaSB11_SBONC6	LOC567396	5 prime	78.825 kb	chr1	52178358		1	OPPOSITE
1BaSB11_SBONC6	si:ch211-236d22.1	intron 8	within gene	chr1	52716246	1		SAME
1BaSB11_SBONC6	zgc:194873	intron 2	within gene	chr1	53286993	1		SAME
1BaSB11_SBONC6	zgc:194873	intron 6	within gene	chr1	53294700	1		SAME
1BaSB11_SBONC6	taf5l	intron 3	within gene	chr1	53350642	1		OPPOSITE
1BaSB11_SBONC6				chr1	53573697	1
1BaSB11_SBONC6	zgc:172216	5 prime	74.354 kb	chr1	53774496	7		SAME
1BaSB11_SBONC6	mb	5 prime	4.663 kb	chr1	53906703		1	SAME
1BaSB11_SBONC6	zgc:195037	intron 8	within gene	chr1	53980702	1		OPPOSITE
1BaSB11_SBONC6	zgc:103710	3 prime	104.678 kb	chr1	54966537	1		OPPOSITE
1BaSB11_SBONC6	c3b	intron 6	within gene	chr1	55229237	1		SAME
1BaSB11_SBONC6	mir722	5 prime	27.306 kb	chr1	55382539	3		SAME
1BaSB11_SBONC6	prkacab	3 prime	14.104 kb	chr1	55633166	1		OPPOSITE
1BaSB11_SBONC6	abca1a	intron 26	within gene	chr1	55869338		14	OPPOSITE
1BaSB11_SBONC6	slc25a10	intron 2	within gene	chr1	56253746	6		SAME
1BaSB11_SBONC6	sc:d0284	intron 3	within gene	chr1	56383349	1		OPPOSITE
1BaSB11_SBONC6	sc:d0284	intron 8	within gene	chr1	56662226	2		SAME
1BaSB11_SBONC6	sc:d0284	intron 9	within gene	chr1	56929856		1	OPPOSITE
1BaSB11_SBONC6	cyyr1	intron 3	within gene	chr1	57226034	4		OPPOSITE
1BaSB11_SBONC6	cyyr1	intron 8	within gene	chr1	57675613		86	OPPOSITE
1BaSB11_SBONC6	zgc:85976	5 prime	2.434 kb	chr2	368196	1		SAME
1BaSB11_SBONC6	si:ch211-241e1.5	3 prime	40.174 kb	chr2	800095		5	OPPOSITE
1BaSB11_SBONC6	pth1ra	intron 1	within gene	chr2	1001820	1		SAME
1BaSB11_SBONC6	zgc:153222	3 prime	5.241 kb	chr2	2691069		1	OPPOSITE
1BaSB11_SBONC6	zgc:153222	3 prime	29.766 kb	chr2	2715594	143		OPPOSITE
1BaSB11_SBONC6	nlgn1	3 prime	34.270 kb	chr2	2852250	1019		OPPOSITE
1BaSB11_SBONC6	tmtops	intron 2	within gene	chr2	3194636	1		OPPOSITE
1BaSB11_SBONC6	tmtops	5 prime	58.971 kb	chr2	3306851	1		OPPOSITE
1BaSB11_SBONC6	tmtops	5 prime	96.221 kb	chr2	3344101	1		OPPOSITE
1BaSB11_SBONC6	dlg1l	intron 3	within gene	chr2	3674396	1150		OPPOSITE
1BaSB11_SBONC6	wnt3a	intron 1	within gene	chr2	3916769	1		SAME
1BaSB11_SBONC6				chr2	4029697	1
1BaSB11_SBONC6	crfb16	exon 4	within gene	chr2	4299491		1	SAME
1BaSB11_SBONC6	zgc:112986	5 prime	3.092 kb	chr2	4334268	59		SAME
1BaSB11_SBONC6	aldh9a1b	intron 6	within gene	chr2	4846362	1		OPPOSITE
1BaSB11_SBONC6	plcd1b	3 prime	23.097 kb	chr2	5651749		2	OPPOSITE
1BaSB11_SBONC6	LOC100006660	5 prime	152.792 kb	chr2	5759825	3		OPPOSITE
1BaSB11_SBONC6	zgc:110206	3 prime	94.451 kb	chr2	6174476		1	OPPOSITE
1BaSB11_SBONC6	zgc:153115	5 prime	12.455 kb	chr2	6475420	12		SAME
1BaSB11_SBONC6	ripk2	5 prime	55.865 kb	chr2	6828336	2	2	SAME
1BaSB11_SBONC6	eif4a2	3 prime	1.838 kb	chr2	7039003	1		OPPOSITE
1BaSB11_SBONC6	zgc:101842	3 prime	11.599 kb	chr2	7150914	1		SAME
1BaSB11_SBONC6	zgc:101842	3 prime	20.745 kb	chr2	7160060	72	1	SAME
1BaSB11_SBONC6				chr2	7789236	5
1BaSB11_SBONC6	si:ch211-284g18.3	intron 8	within gene	chr2	8141046	1		OPPOSITE
1BaSB11_SBONC6	LOC100003595	intron 6	within gene	chr2	8260449		1	OPPOSITE
1BaSB11_SBONC6	LOC100003595	intron 6	within gene	chr2	8262404	1		OPPOSITE
1BaSB11_SBONC6	LOC100003595	intron 3	within gene	chr2	8351933	1		SAME
1BaSB11_SBONC6	st6galnac3	3 prime	137.584 kb	chr2	8623714		2	OPPOSITE
1BaSB11_SBONC6	st6galnac3	intron 2	within gene	chr2	8685242	10	1	OPPOSITE
1BaSB11_SBONC6	vgll4	5 prime	24.215 kb	chr2	8791097		1	SAME
1BaSB11_SBONC6	zgc:110602	3 prime	43.036 kb	chr2	9435312	1		OPPOSITE
1BaSB11_SBONC6	gng12a	5 prime	2.109 kb	chr2	9926318	24		OPPOSITE
1BaSB11_SBONC6	gng12a	5 prime	2.111 kb	chr2	9926320	1		OPPOSITE
1BaSB11_SBONC6	scinlb	intron 1	within gene	chr2	10029761	231		SAME
1BaSB11_SBONC6	rpl5a	intron 6	within gene	chr2	10276685	1265		OPPOSITE
1BaSB11_SBONC6	rpl5a	intron 5	within gene	chr2	10282647	1		SAME
1BaSB11_SBONC6	rpl5a	5 prime	6.569 kb	chr2	10295583	9		SAME
1BaSB11_SBONC6	ssbp3	intron 4	within gene	chr2	10562237		5	OPPOSITE
1BaSB11_SBONC6	lhx8a	3 prime	91.692 kb	chr2	10887252	1158		SAME
1BaSB11_SBONC6				chr2	10963194		294
1BaSB11_SBONC6	zgc:76925	3 prime	56.144 kb	chr2	11033559	1		OPPOSITE
1BaSB11_SBONC6	zgc:123256	exon 3	within gene	chr2	11228208	10		OPPOSITE
1BaSB11_SBONC6	zgc:173962	intron 2	within gene	chr2	11698467	1		SAME
1BaSB11_SBONC6	zgc:173962	intron 2	within gene	chr2	11832269	2	1	SAME
1BaSB11_SBONC6	kdsr	3 prime	46.291 kb	chr2	12333330	1		OPPOSITE
1BaSB11_SBONC6				chr2	12502784	1
1BaSB11_SBONC6	zgc:92437	5 prime	48.484 kb	chr2	13193304	2	13	SAME
1BaSB11_SBONC6	LOC100006444	5 prime	13.017 kb	chr2	13912039		5	OPPOSITE
1BaSB11_SBONC6				chr2	15358264	2
1BaSB11_SBONC6	grk7a	5 prime	13.327 kb	chr2	15582197		1	OPPOSITE
1BaSB11_SBONC6				chr2	15844112	1
1BaSB11_SBONC6				chr2	16223654		2
1BaSB11_SBONC6	amy2a	5 prime	39.971 kb	chr2	16532548	125		OPPOSITE
1BaSB11_SBONC6	zgc:103479	5 prime	44.301 kb	chr2	16762934		38	SAME
1BaSB11_SBONC6	arhgap29b	intron 2	within gene	chr2	16965778		29	OPPOSITE
1BaSB11_SBONC6	si:dkey-10f21.4	intron 3	within gene	chr2	17067969	453		OPPOSITE
1BaSB11_SBONC6				chr2	17856460	3
1BaSB11_SBONC6	zgc:56698	5 prime	1.514 kb	chr2	18140828		1	OPPOSITE
1BaSB11_SBONC6	glula	3 prime	10.704 kb	chr2	18293663	1		OPPOSITE
1BaSB11_SBONC6	glula	3 prime	46.627 kb	chr2	18329586	2		OPPOSITE
1BaSB11_SBONC6	si:dkey-225f23.3	5 prime	27.001 kb	chr2	18445998		2	OPPOSITE
1BaSB11_SBONC6	si:dkey-225f23.3	5 prime	27.003 kb	chr2	18446000	1		SAME
1BaSB11_SBONC6	zgc:66475	5 prime	22.485 kb	chr2	18694454	1		OPPOSITE
1BaSB11_SBONC6	si:ch211-12e1.4	intron 15	within gene	chr2	19706147		1	OPPOSITE
1BaSB11_SBONC6	prrx1a	3 prime	25.101 kb	chr2	20955722	1		SAME
1BaSB11_SBONC6	pik3r2	5 prime	45.255 kb	chr2	22938643	1		SAME
1BaSB11_SBONC6	gyg1	intron 1	within gene	chr2	23173609		1	OPPOSITE
1BaSB11_SBONC6	zgc:101525	5 prime	51.654 kb	chr2	23283916	1		SAME
1BaSB11_SBONC6	zgc:101525	5 prime	56.705 kb	chr2	23288967	1		OPPOSITE
1BaSB11_SBONC6	zgc:92416	5 prime	3.870 kb	chr2	23379707		4	OPPOSITE
1BaSB11_SBONC6	zgc:158463	3 prime	23.226 kb	chr2	23547905	1		SAME
1BaSB11_SBONC6				chr2	23956585		1
1BaSB11_SBONC6	fndc3ba	intron 2	within gene	chr2	24096795	6		OPPOSITE
1BaSB11_SBONC6	fndc3ba	exon 3	within gene	chr2	24141562	1		SAME
1BaSB11_SBONC6	fndc3ba	exon 3	within gene	chr2	24141564	1		SAME
1BaSB11_SBONC6	fndc3ba	intron 24	within gene	chr2	24224803	80		SAME
1BaSB11_SBONC6	pld1a	intron 1	within gene	chr2	24261672	6		OPPOSITE
1BaSB11_SBONC6	zgc:92247	3 prime	35.554 kb	chr2	24658890	1		SAME
1BaSB11_SBONC6	efna2	intron 1	within gene	chr2	25097440	1		OPPOSITE
1BaSB11_SBONC6	hectd3	intron 16	within gene	chr2	25185517		1	SAME
1BaSB11_SBONC6	si:ch73-38p6.1	3 prime	10.606 kb	chr2	26245127	1	3	OPPOSITE
1BaSB11_SBONC6	cdh6	intron 3	within gene	chr2	26644956		1	SAME
1BaSB11_SBONC6	cdh6	intron 1	within gene	chr2	26846375		1	SAME
1BaSB11_SBONC6	si:dkeyp-68h1.1	3 prime	4.959 kb	chr2	27083684		1	OPPOSITE
1BaSB11_SBONC6	ptf1a	5 prime	27.936 kb	chr2	27645962	126		OPPOSITE
1BaSB11_SBONC6	paxip1	3 prime	52.488 kb	chr2	27832700	3		OPPOSITE
1BaSB11_SBONC6	atp6v1h	intron 11	within gene	chr2	28791356	1		OPPOSITE
1BaSB11_SBONC6	atp6v1h	intron 11	within gene	chr2	28794151	2		SAME
1BaSB11_SBONC6	atp6v1h	intron 11	within gene	chr2	28794153	12		SAME
1BaSB11_SBONC6	atp6v1h	intron 11	within gene	chr2	28794155	38		SAME
1BaSB11_SBONC6	atp6v1h	intron 11	within gene	chr2	28794157	3		SAME
1BaSB11_SBONC6	myom1a	3 prime	72.495 kb	chr2	28994242	2		SAME
1BaSB11_SBONC6	ranbp9	intron 13	within gene	chr2	29804644		2	OPPOSITE
1BaSB11_SBONC6	mycb	3 prime	13.677 kb	chr2	30010480	2		OPPOSITE
1BaSB11_SBONC6	fam49b	3 prime	65.668 kb	chr2	30174329	1		SAME
1BaSB11_SBONC6	si:ch211-160i2.3	exon 11	within gene	chr2	30275453		1	OPPOSITE
1BaSB11_SBONC6	zgc:103750	exon 7	within gene	chr2	30739332		1	OPPOSITE
1BaSB11_SBONC6	zgc:92204	3 prime	56.484 kb	chr2	30885125		1	OPPOSITE
1BaSB11_SBONC6	slc6a9	3 prime	6.161 kb	chr2	31399233	1		SAME
1BaSB11_SBONC6	LOC100148828	intron 1	within gene	chr2	31595640	329		OPPOSITE
1BaSB11_SBONC6	atp6v0b	5 prime	54.999 kb	chr2	31720222	2		SAME
1BaSB11_SBONC6	zgc:158703	3 prime	63.794 kb	chr2	32615596	1		SAME
1BaSB11_SBONC6	zgc:158703	3 prime	73.901 kb	chr2	32625703		1	OPPOSITE
1BaSB11_SBONC6				chr2	32689466		432
1BaSB11_SBONC6				chr2	32834657	1
1BaSB11_SBONC6	plk3	3 prime	53.708 kb	chr2	33535150	1		OPPOSITE
1BaSB11_SBONC6	zgc:112418	3 prime	75.125 kb	chr2	33786338		50	SAME
1BaSB11_SBONC6	mir2198	5 prime	6.871 kb	chr2	34791586	1		OPPOSITE
1BaSB11_SBONC6	insra	5 prime	5.115 kb	chr2	35682710	1		OPPOSITE
1BaSB11_SBONC6	hiat1a	5 prime	18.657 kb	chr2	35747941		2	SAME
1BaSB11_SBONC6	hiat1a	5 prime	52.647 kb	chr2	35781931	13		SAME
1BaSB11_SBONC6	si:rp71-1g18.10	intron 3	within gene	chr2	36113743	3		OPPOSITE
1BaSB11_SBONC6	si:rp71-1g18.11	5 prime	2.485 kb	chr2	36143873	4	4	OPPOSITE
1BaSB11_SBONC6	apol1	3 prime	4.453 kb	chr2	36153198	1		OPPOSITE
1BaSB11_SBONC6	pcp4l1	intron 1	within gene	chr2	36172378	5		OPPOSITE
1BaSB11_SBONC6	si:rp71-1g18.1	3 prime	23.656 kb	chr2	36263846	109		SAME
1BaSB11_SBONC6	mmp14b	5 prime	54.870 kb	chr2	36302607	3		SAME
1BaSB11_SBONC6				chr2	37555580	37
1BaSB11_SBONC6				chr2	37601424	96
1BaSB11_SBONC6				chr2	37804943	1
1BaSB11_SBONC6	tctex1d1	5 prime	112.243 kb	chr2	37896393	4		OPPOSITE
1BaSB11_SBONC6	tctex1d1	intron 3	within gene	chr2	37961727	3		OPPOSITE
1BaSB11_SBONC6				chr2	38157864		1
1BaSB11_SBONC6	si:ch211-119o8.5	intron 3	within gene	chr2	38380178	209		OPPOSITE
1BaSB11_SBONC6	si:ch211-119o8.6	intron 1	within gene	chr2	38431304	1		OPPOSITE
1BaSB11_SBONC6	zgc:136870	5 prime	29.717 kb	chr2	39035622		16	SAME
1BaSB11_SBONC6	zgc:136870	5 prime	28.573 kb	chr2	39036766		3	OPPOSITE
1BaSB11_SBONC6	zgc:136870	3 prime	51.227 kb	chr2	39116566	1		SAME
1BaSB11_SBONC6	slc25a36a	5 prime	20.291 kb	chr2	39223590	39		OPPOSITE
1BaSB11_SBONC6	hs6st1a	intron 1	within gene	chr2	39562587	150		SAME
1BaSB11_SBONC6	zgc:152896	3 prime	31.271 kb	chr2	40097928	17		SAME
1BaSB11_SBONC6	epha4b	intron 6	within gene	chr2	40452560		2	OPPOSITE
1BaSB11_SBONC6	epha4b	intron 1	within gene	chr2	40525504		1	SAME
1BaSB11_SBONC6	keap1a	exon 2	within gene	chr2	40842233	39		OPPOSITE
1BaSB11_SBONC6	zgc:136585	5 prime	38.885 kb	chr2	42260963	52		OPPOSITE
1BaSB11_SBONC6	pard3	intron 1	within gene	chr2	42305712		8	OPPOSITE
1BaSB11_SBONC6	pard3	intron 21	within gene	chr2	42413611	4		OPPOSITE
1BaSB11_SBONC6	pard3	3 prime	59.543 kb	chr2	42475640	2		OPPOSITE
1BaSB11_SBONC6	nrp1b	intron 11	within gene	chr2	42621062		1	SAME
1BaSB11_SBONC6	arhgap12a	5 prime	19.973 kb	chr2	43186601		1	OPPOSITE
1BaSB11_SBONC6	zgc:152670	3 prime	11.044 kb	chr2	43424004	4		SAME
1BaSB11_SBONC6	zgc:123304	intron 2	within gene	chr2	43442747		4	SAME
1BaSB11_SBONC6	camk2n1	3 prime	73.160 kb	chr2	43930768	1		SAME
1BaSB11_SBONC6	alg3	3 prime	16.846 kb	chr2	44056305		7	SAME
1BaSB11_SBONC6	zgc:195195	3 prime	58.083 kb	chr2	44213735	1		OPPOSITE
1BaSB11_SBONC6				chr2	44872382	1
1BaSB11_SBONC6				chr2	45105220		6
1BaSB11_SBONC6				chr2	45136632	1
1BaSB11_SBONC6	mbnl1	3 prime	160.490 kb	chr2	45877536		1	SAME
1BaSB11_SBONC6	mbnl1	intron 2	within gene	chr2	45975672		2	OPPOSITE
1BaSB11_SBONC6	mbnl1	intron 1	within gene	chr2	46065735	6		OPPOSITE
1BaSB11_SBONC6	pax3a	5 prime	67.086 kb	chr2	46429229	1		SAME
1BaSB11_SBONC6	cdc34b	3 prime	6.700 kb	chr2	46554708	2	1	SAME
1BaSB11_SBONC6	LOC797092	3 prime	21.107 kb	chr2	46938069	49	1	SAME
1BaSB11_SBONC6				chr2	47762178		319
1BaSB11_SBONC6	mbnl1	5 prime	17.029 kb	chr2	47992262		1	SAME
1BaSB11_SBONC6	zgc:111944	intron 26	within gene	chr2	48395430	1		OPPOSITE
1BaSB11_SBONC6	zgc:111944	intron 20	within gene	chr2	48409294		11	SAME
1BaSB11_SBONC6	wu:fc88b07	3 prime	52.095 kb	chr2	49040327	3		SAME
1BaSB11_SBONC6	wu:fc88b07	3 prime	98.651 kb	chr2	49086883	1		SAME
1BaSB11_SBONC6	wdr48	3 prime	52.921 kb	chr2	49208943	3		OPPOSITE
1BaSB11_SBONC6	slc4a2b	intron 1	within gene	chr2	49567770	1		SAME
1BaSB11_SBONC6	slc4a2b	exon 15	within gene	chr2	49587674	2		SAME
1BaSB11_SBONC6	rps9	3 prime	52.734 kb	chr2	49703776	3		OPPOSITE
1BaSB11_SBONC6	rps9	5 prime	73.900 kb	chr2	49830410	1		OPPOSITE
1BaSB11_SBONC6				chr2	49863753	1
1BaSB11_SBONC6	zgc:158620	5 prime	7.365 kb	chr2	50389704	3		SAME
1BaSB11_SBONC6	wdr48	5 prime	59.355 kb	chr2	50529929	191		SAME
1BaSB11_SBONC6	si:ch211-106n13.1	intron 3	within gene	chr2	50707195	2		OPPOSITE
1BaSB11_SBONC6	si:ch211-106n13.1	intron 1	within gene	chr2	50724889		1	SAME
1BaSB11_SBONC6	si:ch211-106n13.3	5 prime	19.610 kb	chr2	50827635		4	OPPOSITE
1BaSB11_SBONC6	zgc:101761	intron 1	within gene	chr2	51430400	2		OPPOSITE
1BaSB11_SBONC6	zgc:136336	3 prime	104.082 kb	chr2	51820533	503		SAME
1BaSB11_SBONC6	zgc:136336	5 prime	5.842 kb	chr2	51930457	5		OPPOSITE
1BaSB11_SBONC6	scn12aa	3 prime	45.438 kb	chr2	52024343	3		OPPOSITE
1BaSB11_SBONC6				chr2	52359546	3
1BaSB11_SBONC6	pias4l	intron 4	within gene	chr2	53367595		1	SAME
1BaSB11_SBONC6	eef2l	3 prime	100.885 kb	chr2	53495774		1	OPPOSITE
1BaSB11_SBONC6	eef2l	5 prime	33.683 kb	chr2	53630342	9		OPPOSITE
1BaSB11_SBONC6	admp	exon 1	within gene	chr2	54004290	1		SAME
1BaSB11_SBONC6	im:7138239	5 prime	18.903 kb	chr2	54048217		3	OPPOSITE
1BaSB11_SBONC6	zgc:66385	intron 2	within gene	chr2	54116404	16		OPPOSITE
1BaSB11_SBONC6	rx2	intron 1	within gene	chr2	55092158	1		OPPOSITE
1BaSB11_SBONC6	calrl	intron 1	within gene	chr2	55135072	268		SAME
1BaSB11_SBONC6	zgc:85843	5 prime	28.666 kb	chr2	56149688	455		OPPOSITE
1BaSB11_SBONC6				chr2	56520181		521
1BaSB11_SBONC6	mbd3a	3 prime	28.990 kb	chr2	56684316		1	OPPOSITE
1BaSB11_SBONC6	fcer1gl	3 prime	12.618 kb	chr2	57149296	1	1	OPPOSITE
1BaSB11_SBONC6	zgc:77177	intron 6	within gene	chr2	57453406	1		OPPOSITE
1BaSB11_SBONC6	sf3a2	3 prime	6.878 kb	chr2	57527693		1	OPPOSITE
1BaSB11_SBONC6	zgc:110180	intron 10	within gene	chr2	57762692	2		OPPOSITE
1BaSB11_SBONC6	zgc:77390	3 prime	0.591 kb	chr3	10658	66		OPPOSITE
1BaSB11_SBONC6	zgc:92184	5 prime	54.028 kb	chr3	926653		1	SAME
1BaSB11_SBONC6	zgc:172090	5 prime	33.630 kb	chr3	966475	1		SAME
1BaSB11_SBONC6	zgc:174288	3 prime	48.020 kb	chr3	1354389	23		SAME
1BaSB11_SBONC6	LOC571647	intron 1	within gene	chr3	1426275	631		OPPOSITE
1BaSB11_SBONC6				chr3	2647068	1
1BaSB11_SBONC6	zgc:153036	3 prime	82.784 kb	chr3	2926822	10		SAME
1BaSB11_SBONC6	zgc:77127	5 prime	30.248 kb	chr3	3074880		1	SAME
1BaSB11_SBONC6	cygb1	intron 1	within gene	chr3	3735662	133		SAME
1BaSB11_SBONC6	cygb1	intron 1	within gene	chr3	3745139	4		OPPOSITE
1BaSB11_SBONC6	cygb1	intron 1	within gene	chr3	3769759	6		OPPOSITE
1BaSB11_SBONC6	cygb1	5 prime	32.409 kb	chr3	3913841		3	OPPOSITE
1BaSB11_SBONC6				chr3	4088579	1
1BaSB11_SBONC6				chr3	4771431		1
1BaSB11_SBONC6				chr3	4783674	1
1BaSB11_SBONC6	zgc:66419	5 prime	27.042 kb	chr3	5283903		1	OPPOSITE
1BaSB11_SBONC6	zgc:66419	5 prime	29.430 kb	chr3	5286291		7	OPPOSITE
1BaSB11_SBONC6	zgc:66419	5 prime	40.243 kb	chr3	5297104		1	SAME
1BaSB11_SBONC6	zgc:109949	3 prime	71.776 kb	chr3	5350632	1		SAME
1BaSB11_SBONC6				chr3	5856641	3
1BaSB11_SBONC6				chr3	5914174	1
1BaSB11_SBONC6				chr3	6294314		27
1BaSB11_SBONC6	zgc:113250	5 prime	12.461 kb	chr3	6923469		3	OPPOSITE
1BaSB11_SBONC6				chr3	7059903	1
1BaSB11_SBONC6				chr3	7084630	1
1BaSB11_SBONC6	nog1	5 prime	76.742 kb	chr3	7113727		1	OPPOSITE
1BaSB11_SBONC6	nog1	5 prime	56.746 kb	chr3	7133723	4		OPPOSITE
1BaSB11_SBONC6	nog1	3 prime	69.578 kb	chr3	7260047		2	OPPOSITE
1BaSB11_SBONC6	cbx2	3 prime	64.189 kb	chr3	7286016		1	OPPOSITE
1BaSB11_SBONC6				chr3	7465337		84
1BaSB11_SBONC6				chr3	7489814	1
1BaSB11_SBONC6	zgc:123296	5 prime	96.021 kb	chr3	7666269	1	5	OPPOSITE
1BaSB11_SBONC6	zgc:123296	5 prime	84.556 kb	chr3	7677734	4		OPPOSITE
1BaSB11_SBONC6	prkar1b	5 prime	210.839 kb	chr3	8171310		5	OPPOSITE
1BaSB11_SBONC6	pdgfab	3 prime	5.626 kb	chr3	8467696	1		OPPOSITE
1BaSB11_SBONC6	zgc:158220	intron 2	within gene	chr3	9637287		2	SAME
1BaSB11_SBONC6	zgc:158220	intron 2	within gene	chr3	9699389	2		SAME
1BaSB11_SBONC6	zgc:158220	intron 2	within gene	chr3	9873273	757		OPPOSITE
1BaSB11_SBONC6	zgc:158220	intron 2	within gene	chr3	9881418	149		OPPOSITE
1BaSB11_SBONC6	zgc:63577	intron 1	within gene	chr3	9948574	1	1	OPPOSITE
1BaSB11_SBONC6	zgc:63577	intron 1	within gene	chr3	10057340	1		OPPOSITE
1BaSB11_SBONC6	zgc:63577	intron 1	within gene	chr3	10114892	3		SAME
1BaSB11_SBONC6	zgc:63577	intron 1	within gene	chr3	10147404		1	OPPOSITE
1BaSB11_SBONC6	zgc:63577	3 prime	50.632 kb	chr3	10367595	1		SAME
1BaSB11_SBONC6	zgc:136878	intron 3	within gene	chr3	10805990		14	SAME
1BaSB11_SBONC6	hn1l	3 prime	63.864 kb	chr3	11971128	4		SAME
1BaSB11_SBONC6	atp6v0c	5 prime	10.748 kb	chr3	12111193	1		OPPOSITE
1BaSB11_SBONC6	rpl19	3 prime	66.645 kb	chr3	12344065	13		OPPOSITE
1BaSB11_SBONC6	slc17a7	intron 1	within gene	chr3	12666396		1	SAME
1BaSB11_SBONC6	gys1	intron 3	within gene	chr3	12774688	1		SAME
1BaSB11_SBONC6	tmem86b	3 prime	2.796 kb	chr3	12818631	1		OPPOSITE
1BaSB11_SBONC6	atp6v0a1a	intron 4	within gene	chr3	12977248	62		SAME
1BaSB11_SBONC6	stat3	intron 2	within gene	chr3	13111837	1		OPPOSITE
1BaSB11_SBONC6	stat5.1	intron 2	within gene	chr3	13355701		1	SAME
1BaSB11_SBONC6	stat5.1	intron 15	within gene	chr3	13417180	1		SAME
1BaSB11_SBONC6	stat5.1	3 prime	27.213 kb	chr3	13464909	1		SAME
1BaSB11_SBONC6				chr3	16920719	1
1BaSB11_SBONC6				chr3	17002581	2
1BaSB11_SBONC6				chr3	17110033	5
1BaSB11_SBONC6	spop	intron 4	within gene	chr3	17317176		14	SAME
1BaSB11_SBONC6				chr3	18030462	1
1BaSB11_SBONC6	cdc27	5 prime	81.290 kb	chr3	18658889	5		SAME
1BaSB11_SBONC6				chr3	18736162	1	1
1BaSB11_SBONC6				chr3	18930070		135
1BaSB11_SBONC6	syngr1a	intron 1	within gene	chr3	19345542	163		OPPOSITE
1BaSB11_SBONC6	zgc:85812	5 prime	42.433 kb	chr3	19950722		1	OPPOSITE
1BaSB11_SBONC6	zgc:85812	5 prime	30.065 kb	chr3	19963090	1		SAME
1BaSB11_SBONC6	zgc:85812	3 prime	61.621 kb	chr3	20054776	2		SAME
1BaSB11_SBONC6	col1a1a	5 prime	47.129 kb	chr3	20191301	43	2	SAME
1BaSB11_SBONC6	zgc:175094	5 prime	2.083 kb	chr3	20466886	3		OPPOSITE
1BaSB11_SBONC6	eve1	exon 1	within gene	chr3	20642827	1		OPPOSITE
1BaSB11_SBONC6	csf2rb	3 prime	38.470 kb	chr3	21265541	567		OPPOSITE
1BaSB11_SBONC6	zgc:171506	5 prime	31.398 kb	chr3	21562598		205	SAME
1BaSB11_SBONC6	zgc:162641	3 prime	18.560 kb	chr3	21677116	1		SAME
1BaSB11_SBONC6	zgc:162641	3 prime	61.570 kb	chr3	21720126		4	OPPOSITE
1BaSB11_SBONC6	kpna2	5 prime	52.042 kb	chr3	22396091	1		OPPOSITE
1BaSB11_SBONC6	grb2	intron 1	within gene	chr3	22418740	2		SAME
1BaSB11_SBONC6	ppl	5 prime	43.887 kb	chr3	22901756	1		OPPOSITE
1BaSB11_SBONC6	ppl	5 prime	23.281 kb	chr3	22922362	1		OPPOSITE
1BaSB11_SBONC6	glyr1	intron 5	within gene	chr3	22953820	2		OPPOSITE
1BaSB11_SBONC6	rogdi	3 prime	27.366 kb	chr3	23004954	6		SAME
1BaSB11_SBONC6	rab40c	3 prime	88.972 kb	chr3	23968262	1		SAME
1BaSB11_SBONC6	rab40c	intron 2	within gene	chr3	24038739	1		SAME
1BaSB11_SBONC6	nubp1	intron 3	within gene	chr3	24330804	1		OPPOSITE
1BaSB11_SBONC6				chr3	24730615		1
1BaSB11_SBONC6	zgc:163109	intron 3	within gene	chr3	25171922	561		SAME
1BaSB11_SBONC6	a2bp1	intron 7	within gene	chr3	25412582	1		OPPOSITE
1BaSB11_SBONC6				chr3	25905616	1
1BaSB11_SBONC6				chr3	25933670	2	1
1BaSB11_SBONC6				chr3	25963287	1
1BaSB11_SBONC6	gsg1l	3 prime	101.402 kb	chr3	26031511	233		SAME
1BaSB11_SBONC6				chr3	26585666	3
1BaSB11_SBONC6				chr3	26675859	8
1BaSB11_SBONC6	nucb1	3 prime	74.386 kb	chr3	27460487	1		SAME
1BaSB11_SBONC6	zgc:136820	intron 24	within gene	chr3	27691179	1		SAME
1BaSB11_SBONC6	suv420h2	3 prime	94.240 kb	chr3	28180343	1		OPPOSITE
1BaSB11_SBONC6	suv420h2	3 prime	28.845 kb	chr3	28245738		1	SAME
1BaSB11_SBONC6	pih1d1	intron 3	within gene	chr3	29432665		1	SAME
1BaSB11_SBONC6	prl	3 prime	4.439 kb	chr3	29605990	1		SAME
1BaSB11_SBONC6	rras	5 prime	7.674 kb	chr3	29663952	8		SAME
1BaSB11_SBONC6	zgc:113006	5 prime	6.799 kb	chr3	30243760	5	3	SAME
1BaSB11_SBONC6	carm1	intron 1	within gene	chr3	31460975		1	SAME
1BaSB11_SBONC6	sept9a	3 prime	132.607 kb	chr3	31739796	1		OPPOSITE
1BaSB11_SBONC6	dusp3	exon 2	within gene	chr3	31996885		1	SAME
1BaSB11_SBONC6	smarce1	5 prime	53.718 kb	chr3	32252366		259	OPPOSITE
1BaSB11_SBONC6	prkcbb	intron 16	within gene	chr3	32547636	120		OPPOSITE
1BaSB11_SBONC6	wu:fc10d10	3 prime	6.196 kb	chr3	32848808	1		SAME
1BaSB11_SBONC6	traf7	3 prime	79.494 kb	chr3	33025319	1		SAME
1BaSB11_SBONC6	crlf3	5 prime	41.933 kb	chr3	33116485		386	SAME
1BaSB11_SBONC6	gna13b	3 prime	12.171 kb	chr3	33590990	1		OPPOSITE
1BaSB11_SBONC6	gna13b	3 prime	18.851 kb	chr3	33597670	5		OPPOSITE
1BaSB11_SBONC6	gna13b	3 prime	18.853 kb	chr3	33597672	1		OPPOSITE
1BaSB11_SBONC6	pdxdc1	5 prime	11.955 kb	chr3	33731950		387	SAME
1BaSB11_SBONC6	ramp2	intron 3	within gene	chr3	33962031	1		OPPOSITE
1BaSB11_SBONC6	ramp2	5 prime	61.130 kb	chr3	34026681		37	SAME
1BaSB11_SBONC6	mlx	5 prime	32.669 kb	chr3	34300313		1	SAME
1BaSB11_SBONC6	accn1	intron 4	within gene	chr3	35201657	1		SAME
1BaSB11_SBONC6				chr3	35912314	1
1BaSB11_SBONC6	zgc:158687	exon 7	within gene	chr3	36232696	4		OPPOSITE
1BaSB11_SBONC6	zgc:154169	5 prime	16.784 kb	chr3	36338044	1		SAME
1BaSB11_SBONC6	zgc:100868	5 prime	13.657 kb	chr3	36625286		1	OPPOSITE
1BaSB11_SBONC6	llgl1	intron 2	within gene	chr3	37140823		7	SAME
1BaSB11_SBONC6	znf598	exon 11	within gene	chr3	37312063	1		SAME
1BaSB11_SBONC6	bactin2	intron 1	within gene	chr3	37651752	2723	8	OPPOSITE
1BaSB11_SBONC6	bactin2	intron 1	within gene	chr3	37652379	1112		SAME
1BaSB11_SBONC6	bactin2	exon 1	within gene	chr3	37652917		2	OPPOSITE
1BaSB11_SBONC6	bactin2	5 prime	0.027 kb	chr3	37652969	2		OPPOSITE
1BaSB11_SBONC6	bactin2	5 prime	0.028 kb	chr3	37652970	6822	8	SAME
1BaSB11_SBONC6	bactin2	5 prime	0.030 kb	chr3	37652972	1467	3	OPPOSITE
1BaSB11_SBONC6	bactin2	5 prime	0.058 kb	chr3	37653000	1		SAME
1BaSB11_SBONC6	bactin2	5 prime	0.132 kb	chr3	37653074	7	1	OPPOSITE
1BaSB11_SBONC6	bactin2	5 prime	0.405 kb	chr3	37653347	2		OPPOSITE
1BaSB11_SBONC6	bactin2	5 prime	0.984 kb	chr3	37653926	151		SAME
1BaSB11_SBONC6	bactin2	5 prime	0.989 kb	chr3	37653931	2236	3	SAME
1BaSB11_SBONC6	fscn1	intron 2	within gene	chr3	37706831		57	OPPOSITE
1BaSB11_SBONC6				chr3	38238481	61	9
1BaSB11_SBONC6				chr3	38511015	1
1BaSB11_SBONC6				chr3	38565885		1
1BaSB11_SBONC6				chr3	38662910		1
1BaSB11_SBONC6	lfng	5 prime	64.825 kb	chr3	38985202		10	SAME
1BaSB11_SBONC6	nudt1	5 prime	9.606 kb	chr3	39258425		1	SAME
1BaSB11_SBONC6	jmjd5	5 prime	104.552 kb	chr3	39574790	3		OPPOSITE
1BaSB11_SBONC6	jmjd5	exon 5	within gene	chr3	39678540	6		OPPOSITE
1BaSB11_SBONC6	snn	exon 2	within gene	chr3	39946224		1	SAME
1BaSB11_SBONC6	axin1	3 prime	97.935 kb	chr3	40279408	1		SAME
1BaSB11_SBONC6				chr3	40396936	1
1BaSB11_SBONC6	mafk	5 prime	33.976 kb	chr3	40875552	1		SAME
1BaSB11_SBONC6	zfand2a	5 prime	38.583 kb	chr3	41214506		3	SAME
1BaSB11_SBONC6				chr3	41463921		2
1BaSB11_SBONC6	hs3st4	3 prime	285.642 kb	chr3	41520822		1	SAME
1BaSB11_SBONC6	hs3st4	5 prime	87.248 kb	chr3	41893712	1		OPPOSITE
1BaSB11_SBONC6	kctd5	3 prime	86.931 kb	chr3	42247337	2	12	SAME
1BaSB11_SBONC6	mir2195	3 prime	25.974 kb	chr3	42714359		1	SAME
1BaSB11_SBONC6	LOC566015	3 prime	141.336 kb	chr3	43027094	118		OPPOSITE
1BaSB11_SBONC6	LOC566015	3 prime	124.301 kb	chr3	43044129	14		OPPOSITE
1BaSB11_SBONC6	raver1	5 prime	24.035 kb	chr3	43596335		1	OPPOSITE
1BaSB11_SBONC6	prkcsh	5 prime	39.247 kb	chr3	43807981	1		OPPOSITE
1BaSB11_SBONC6	elavl3	5 prime	71.151 kb	chr3	43940778		1	SAME
1BaSB11_SBONC6	elavl3	5 prime	90.393 kb	chr3	43960020		2	SAME
1BaSB11_SBONC6				chr3	43990485	1
1BaSB11_SBONC6				chr3	44073524	1
1BaSB11_SBONC6	dnajb1a	5 prime	27.244 kb	chr3	44737611		1	OPPOSITE
1BaSB11_SBONC6				chr3	45174386	86
1BaSB11_SBONC6	ndel1b	5 prime	45.484 kb	chr3	45285507	18		OPPOSITE
1BaSB11_SBONC6	ndel1b	3 prime	10.604 kb	chr3	45341595	2		OPPOSITE
1BaSB11_SBONC6				chr3	46321988	134
1BaSB11_SBONC6				chr3	46703275	1
1BaSB11_SBONC6	zgc:158309	3 prime	150.665 kb	chr3	46756612		1	SAME
1BaSB11_SBONC6	zgc:158309	intron 4	within gene	chr3	46846731	1		SAME
1BaSB11_SBONC6	tmed1a	3 prime	4.747 kb	chr3	47010038	1		SAME
1BaSB11_SBONC6	dnm2	intron 1	within gene	chr3	47079101		1	SAME
1BaSB11_SBONC6	qtrt1	3 prime	34.110 kb	chr3	47149553	1		SAME
1BaSB11_SBONC6	qtrt1	3 prime	75.338 kb	chr3	47190781	2010	3	SAME
1BaSB11_SBONC6				chr3	47344746	1
1BaSB11_SBONC6				chr3	47617258	2	1
1BaSB11_SBONC6	rsad1	5 prime	3.419 kb	chr3	48246246	3		SAME
1BaSB11_SBONC6	rsad1	5 prime	5.341 kb	chr3	48248168		2	OPPOSITE
1BaSB11_SBONC6	btr02	intron 5	within gene	chr3	48268135	14		SAME
1BaSB11_SBONC6	mrpl12	3 prime	56.340 kb	chr3	48400101		2	SAME
1BaSB11_SBONC6				chr3	48451007	1
1BaSB11_SBONC6				chr3	49590913	1
1BaSB11_SBONC6				chr3	49607244	1
1BaSB11_SBONC6	brd4	intron 2	within gene	chr3	50648917	8		OPPOSITE
1BaSB11_SBONC6				chr3	51661179	1
1BaSB11_SBONC6	olfm2	intron 1	within gene	chr3	51946029		10	OPPOSITE
1BaSB11_SBONC6	olfm2	3 prime	99.737 kb	chr3	52110835	2		SAME
1BaSB11_SBONC6	zgc:171489	intron 1	within gene	chr3	52457953		177	OPPOSITE
1BaSB11_SBONC6	zgc:113030	3 prime	8.816 kb	chr3	53022985		3	SAME
1BaSB11_SBONC6	zgc:174268	3 prime	6.249 kb	chr3	53045281		1	OPPOSITE
1BaSB11_SBONC6	angptl6	intron 4	within gene	chr3	53435245	1		OPPOSITE
1BaSB11_SBONC6	dnmt1	5 prime	2.596 kb	chr3	53513516	1		OPPOSITE
1BaSB11_SBONC6	axin2	exon 1	within gene	chr3	54314119		1	SAME
1BaSB11_SBONC6	zgc:165627	intron 8	within gene	chr3	54526667	2		OPPOSITE
1BaSB11_SBONC6	zgc:112183	intron 3	within gene	chr3	54645253		2	OPPOSITE
1BaSB11_SBONC6				chr3	54776465	3
1BaSB11_SBONC6				chr3	54906919	308
1BaSB11_SBONC6				chr3	55184102	2	1
1BaSB11_SBONC6				chr3	55239252	1
1BaSB11_SBONC6				chr3	55258208		1
1BaSB11_SBONC6	tex2	5 prime	75.626 kb	chr3	55676375	1		SAME
1BaSB11_SBONC6	dlg4	5 prime	17.093 kb	chr3	55771284	1		OPPOSITE
1BaSB11_SBONC6	dlg4	5 prime	95.665 kb	chr3	55849856	1		SAME
1BaSB11_SBONC6				chr3	55906313	1
1BaSB11_SBONC6	stk19	5 prime	23.339 kb	chr3	56099897		3	OPPOSITE
1BaSB11_SBONC6	si:busm1-160c18.3	3 prime	43.426 kb	chr3	56570467		2	OPPOSITE
1BaSB11_SBONC6	notum3	5 prime	15.846 kb	chr3	56815404	1		SAME
1BaSB11_SBONC6	notum3	5 prime	58.239 kb	chr3	56857797	5		OPPOSITE
1BaSB11_SBONC6	syngr2a	5 prime	14.243 kb	chr3	56967807		2	SAME
1BaSB11_SBONC6	LOC798075	3 prime	45.765 kb	chr3	57222736	1		OPPOSITE
1BaSB11_SBONC6	socs3a	3 prime	63.674 kb	chr3	57277459	1	1	SAME
1BaSB11_SBONC6	cyth1	intron 1	within gene	chr3	57429449	1		OPPOSITE
1BaSB11_SBONC6	zgc:85889	3 prime	8.031 kb	chr3	58138236	1		OPPOSITE
1BaSB11_SBONC6	zgc:113380	intron 11	within gene	chr3	58489875	1576		SAME
1BaSB11_SBONC6				chr3	58663110	1
1BaSB11_SBONC6	foxj1a	intron 2	within gene	chr3	58801143	1		SAME
1BaSB11_SBONC6	zgc:63976	3 prime	53.151 kb	chr3	59119058	4		SAME
1BaSB11_SBONC6				chr3	60103355		1
1BaSB11_SBONC6	lrp6	intron 2	within gene	chr4	272196	2		OPPOSITE
1BaSB11_SBONC6	mtpn	3 prime	1.581 kb	chr4	774955	1533		SAME
1BaSB11_SBONC6	zgc:162885	3 prime	10.997 kb	chr4	858293	6	3	OPPOSITE
1BaSB11_SBONC6	zgc:91952	3 prime	15.050 kb	chr4	1186515	5		OPPOSITE
1BaSB11_SBONC6	zgc:91952	3 prime	15.052 kb	chr4	1186517	2		OPPOSITE
1BaSB11_SBONC6	si:ch211-51e12.4	intron 1	within gene	chr4	1755627	1	2	SAME
1BaSB11_SBONC6	slc38a4	3 prime	1.283 kb	chr4	2070328		1	OPPOSITE
1BaSB11_SBONC6	arid2	intron 20	within gene	chr4	2152353	1		SAME
1BaSB11_SBONC6	fgfr1op2	3 prime	13.466 kb	chr4	2246858		1	SAME
1BaSB11_SBONC6	slco1c1	intron 2	within gene	chr4	3273606	1		SAME
1BaSB11_SBONC6	slco1c1	5 prime	46.863 kb	chr4	3336314	17		SAME
1BaSB11_SBONC6	aebp2	5 prime	15.334 kb	chr4	3522539	2		OPPOSITE
1BaSB11_SBONC6	aebp2	5 prime	65.204 kb	chr4	3572409	1		OPPOSITE
1BaSB11_SBONC6	si:dkey-3n7.1	5 prime	94.288 kb	chr4	4222224		1	SAME
1BaSB11_SBONC6	si:dkey-3n7.3	intron 6	within gene	chr4	4441855	3	18	OPPOSITE
1BaSB11_SBONC6	tmem168a	5 prime	29.248 kb	chr4	5146693	1		OPPOSITE
1BaSB11_SBONC6	foxp2	intron 1	within gene	chr4	5299417	1		OPPOSITE
1BaSB11_SBONC6	foxp2	intron 6	within gene	chr4	5436481		1	SAME
1BaSB11_SBONC6	foxp2	intron 9	within gene	chr4	5472238		277	OPPOSITE
1BaSB11_SBONC6	foxp2	3 prime	17.455 kb	chr4	5520442	15		SAME
1BaSB11_SBONC6	si:dkey-14d8.2	3 prime	23.325 kb	chr4	6021702	155		SAME
1BaSB11_SBONC6	zgc:113263	3 prime	10.344 kb	chr4	6071547	230		SAME
1BaSB11_SBONC6	ccnd2b	5 prime	12.829 kb	chr4	6303318		2	SAME
1BaSB11_SBONC6	zgc:114172	3 prime	55.622 kb	chr4	6548716		1	OPPOSITE
1BaSB11_SBONC6	zgc:172284	5 prime	129.426 kb	chr4	7285655	1		OPPOSITE
1BaSB11_SBONC6	ccdc3	3 prime	20.391 kb	chr4	7503483		1	SAME
1BaSB11_SBONC6	wnt5b	5 prime	15.554 kb	chr4	8032491	1		OPPOSITE
1BaSB11_SBONC6	samm50l	intron 3	within gene	chr4	8535713	705		SAME
1BaSB11_SBONC6	zgc:85676	intron 3	within gene	chr4	9267783		3	OPPOSITE
1BaSB11_SBONC6	sbf1	intron 1	within gene	chr4	9591131	3		OPPOSITE
1BaSB11_SBONC6	sbf1	intron 13	within gene	chr4	9612867	8	3	SAME
1BaSB11_SBONC6	kcnd2	intron 1	within gene	chr4	10042552		1	OPPOSITE
1BaSB11_SBONC6	kcnd2	intron 2	within gene	chr4	10153109	3		OPPOSITE
1BaSB11_SBONC6	si:dkey-21h14.7	3 prime	36.162 kb	chr4	10838852	1		SAME
1BaSB11_SBONC6	sema3aa	intron 7	within gene	chr4	10956453	1		SAME
1BaSB11_SBONC6	mir29b-3	5 prime	23.949 kb	chr4	11237153	1		SAME
1BaSB11_SBONC6	btbd11a	intron 9	within gene	chr4	11430379	1761		OPPOSITE
1BaSB11_SBONC6	si:dkey-222f8.3	intron 5	within gene	chr4	11640589		1	OPPOSITE
1BaSB11_SBONC6	zgc:92710	intron 1	within gene	chr4	11744765	4		OPPOSITE
1BaSB11_SBONC6	zgc:92710	3 prime	3.149 kb	chr4	11838214		1	OPPOSITE
1BaSB11_SBONC6	zgc:92710	3 prime	5.535 kb	chr4	11840600		1	OPPOSITE
1BaSB11_SBONC6	zgc:103517	intron 2	within gene	chr4	12071269	1		SAME
1BaSB11_SBONC6	zgc:92357	5 prime	18.408 kb	chr4	12346914		1	OPPOSITE
1BaSB11_SBONC6	b2m	5 prime	20.727 kb	chr4	12421141	1		SAME
1BaSB11_SBONC6	calua	intron 3	within gene	chr4	13176155		38	OPPOSITE
1BaSB11_SBONC6	si:ch211-266a5.1	3 prime	14.336 kb	chr4	13237210	1	2	OPPOSITE
1BaSB11_SBONC6	cntn1b	3 prime	14.931 kb	chr4	13376561		1	SAME
1BaSB11_SBONC6	prickle1b	5 prime	1.600 kb	chr4	13579734	1		SAME
1BaSB11_SBONC6	twf1b	5 prime	43.143 kb	chr4	13810483		1	OPPOSITE
1BaSB11_SBONC6	zgc:162825	3 prime	27.614 kb	chr4	14110586	1		SAME
1BaSB11_SBONC6	plxnb2a	5 prime	14.463 kb	chr4	14311694	2	2	OPPOSITE
1BaSB11_SBONC6	si:ch211-127b11.1	3 prime	60.857 kb	chr4	14391931	4		SAME
1BaSB11_SBONC6	nrf1	intron 2	within gene	chr4	14911324	1		SAME
1BaSB11_SBONC6	exoc4	intron 17	within gene	chr4	15621369		1	OPPOSITE
1BaSB11_SBONC6	fam60a	intron 5	within gene	chr4	16450276	2		SAME
1BaSB11_SBONC6	casc1	3 prime	7.529 kb	chr4	17072592	424		OPPOSITE
1BaSB11_SBONC6	ascl1a	3 prime	13.791 kb	chr4	17245895	1		OPPOSITE
1BaSB11_SBONC6	gnptab	intron 5	within gene	chr4	17489672	1		OPPOSITE
1BaSB11_SBONC6	anks1b	intron 17	within gene	chr4	17777989	9		OPPOSITE
1BaSB11_SBONC6	anks1b	intron 11	within gene	chr4	17863136	1		SAME
1BaSB11_SBONC6	si:dkey-31f5.1	exon 13	within gene	chr4	18632342		1	SAME
1BaSB11_SBONC6	si:dkey-31f5.7	3 prime	4.296 kb	chr4	18803588		2	OPPOSITE
1BaSB11_SBONC6	snd1	intron 11	within gene	chr4	19415355	1		OPPOSITE
1BaSB11_SBONC6	hgfa	intron 13	within gene	chr4	19505521	43		SAME
1BaSB11_SBONC6	cacna2d1a	intron 3	within gene	chr4	19626438	5		OPPOSITE
1BaSB11_SBONC6	cacna2d1a	5 prime	15.143 kb	chr4	19687147	11		SAME
1BaSB11_SBONC6	drd4-rs	intron 1	within gene	chr4	19813883	10		OPPOSITE
1BaSB11_SBONC6	LOC561161	5 prime	1.932 kb	chr4	19833435		1	OPPOSITE
1BaSB11_SBONC6	LOC568176	3 prime	33.996 kb	chr4	20073899		1	SAME
1BaSB11_SBONC6				chr4	20478346	36
1BaSB11_SBONC6	syt1a	5 prime	175.758 kb	chr4	20932787		1	SAME
1BaSB11_SBONC6	syt1a	5 prime	162.652 kb	chr4	20945893	1		SAME
1BaSB11_SBONC6	pawrl	intron 5	within gene	chr4	21124043	5		SAME
1BaSB11_SBONC6	ppp1r12a	intron 25	within gene	chr4	21283931	354		OPPOSITE
1BaSB11_SBONC6	si:ch211-107n23.1	intron 1	within gene	chr4	21926623	2	5	SAME
1BaSB11_SBONC6	si:ch211-107n23.1	intron 1	within gene	chr4	21937038		1	OPPOSITE
1BaSB11_SBONC6				chr4	23290635	1
1BaSB11_SBONC6	zgc:110307	5 prime	5.467 kb	chr4	23559390	2		SAME
1BaSB11_SBONC6	celf2	5 prime	5.684 kb	chr4	23764234	1		SAME
1BaSB11_SBONC6	celf2	5 prime	24.249 kb	chr4	23782799	5	1	SAME
1BaSB11_SBONC6				chr4	23929756		1
1BaSB11_SBONC6				chr4	24528295	1
1BaSB11_SBONC6				chr4	24645524	15
1BaSB11_SBONC6				chr4	24667109		35
1BaSB11_SBONC6	zgc:92233	5 prime	3.189 kb	chr4	24926555	60		OPPOSITE
1BaSB11_SBONC6	LOC794484	exon 10	within gene	chr4	25245642		1	SAME
1BaSB11_SBONC6	fgd6	intron 2	within gene	chr4	25409334	31		SAME
1BaSB11_SBONC6	tmcc3	3 prime	34.376 kb	chr4	25587430	1		SAME
1BaSB11_SBONC6	tmcc3	3 prime	34.378 kb	chr4	25587432	1		SAME
1BaSB11_SBONC6	zgc:77651	3 prime	13.467 kb	chr4	25617585	4		SAME
1BaSB11_SBONC6	zgc:77651	5 prime	7.585 kb	chr4	25638637	7		OPPOSITE
1BaSB11_SBONC6	zgc:77651	5 prime	9.992 kb	chr4	25641044	8		OPPOSITE
1BaSB11_SBONC6	tmem110l	intron 6	within gene	chr4	26049029	2		SAME
1BaSB11_SBONC6	zgc:171482	3 prime	20.824 kb	chr4	26248693		1	SAME
1BaSB11_SBONC6	zgc:171482	3 prime	20.822 kb	chr4	26248695		1277	SAME
1BaSB11_SBONC6	zgc:153383	3 prime	32.815 kb	chr4	26764635	14		OPPOSITE
1BaSB11_SBONC6				chr4	26874339	7
1BaSB11_SBONC6	zgc:173714	3 prime	5.531 kb	chr4	27328010	4	1	SAME
1BaSB11_SBONC6	zgc:174273	intron 1	within gene	chr4	28112521		148	SAME
1BaSB11_SBONC6	zgc:174273	intron 1	within gene	chr4	28114777		1	SAME
1BaSB11_SBONC6	zgc:174273	5 prime	97.692 kb	chr4	28240764	1		SAME
1BaSB11_SBONC6				chr4	29517394	1
1BaSB11_SBONC6				chr4	30106447	841
1BaSB11_SBONC6				chr4	30488950	2
1BaSB11_SBONC6				chr4	31955156	1
1BaSB11_SBONC6				chr4	31960604	2
1BaSB11_SBONC6				chr4	31967313	1
1BaSB11_SBONC6				chr4	31985572	20	197
1BaSB11_SBONC6				chr4	31992185	1
1BaSB11_SBONC6	cerk	intron 7	within gene	chr4	32422536	4		SAME
1BaSB11_SBONC6	cerk	intron 1	within gene	chr4	32445467		2	OPPOSITE
1BaSB11_SBONC6	tbc1d22a	intron 8	within gene	chr4	32557309	18		OPPOSITE
1BaSB11_SBONC6	tbc1d22a	3 prime	2.305 kb	chr4	32759163		1	OPPOSITE
1BaSB11_SBONC6	si:dkey-200m9.1	5 prime	66.913 kb	chr4	33068495	4		SAME
1BaSB11_SBONC6				chr4	33644748	1
1BaSB11_SBONC6				chr4	33814485	1
1BaSB11_SBONC6	zgc:174315	3 prime	67.498 kb	chr4	34174037	2	3	SAME
1BaSB11_SBONC6	mir430a-23	5 prime	40.060 kb	chr4	34419311	1	1	OPPOSITE
1BaSB11_SBONC6	mir430a-23	5 prime	83.390 kb	chr4	34462641	1		OPPOSITE
1BaSB11_SBONC6	mir430a-23	5 prime	89.216 kb	chr4	34468467	10		OPPOSITE
1BaSB11_SBONC6				chr4	34664077	1
1BaSB11_SBONC6	zgc:173721	intron 1	within gene	chr4	35048831	1		OPPOSITE
1BaSB11_SBONC6	zgc:173721	intron 1	within gene	chr4	35170810		1	SAME
1BaSB11_SBONC6	zgc:174710	intron 3	within gene	chr4	35750777	1		OPPOSITE
1BaSB11_SBONC6	zgc:174710	intron 3	within gene	chr4	35932791	32		OPPOSITE
1BaSB11_SBONC6	zgc:173721	intron 3	within gene	chr4	36180396	2		SAME
1BaSB11_SBONC6				chr4	36592706	1
1BaSB11_SBONC6	zgc:174944	intron 12	within gene	chr4	36773044		2	SAME
1BaSB11_SBONC6	zgc:174944	intron 9	within gene	chr4	37098353	5		SAME
1BaSB11_SBONC6	zgc:174944	intron 4	within gene	chr4	38907149	1		SAME
1BaSB11_SBONC6				chr4	39771503	1
1BaSB11_SBONC6				chr4	39771839		1
1BaSB11_SBONC6				chr4	40078453	9
1BaSB11_SBONC6	zgc:173617	intron 5	within gene	chr4	44230402	1		OPPOSITE
1BaSB11_SBONC6				chr4	45062394	2
1BaSB11_SBONC6				chr4	45425092	1
1BaSB11_SBONC6	LOC100006564	5 prime	35.796 kb	chr4	45790517	2		OPPOSITE
1BaSB11_SBONC6				chr4	45919902	1
1BaSB11_SBONC6				chr4	45919904	55
1BaSB11_SBONC6	zgc:173702	intron 3	within gene	chr4	46376169		1	SAME
1BaSB11_SBONC6				chr4	48063364		3
1BaSB11_SBONC6	zgc:173716	3 prime	104.291 kb	chr4	48067422	564		OPPOSITE
1BaSB11_SBONC6	zgc:173716	3 prime	62.376 kb	chr4	48109337		107	SAME
1BaSB11_SBONC6	zgc:173708	intron 1	within gene	chr4	48208322	1		OPPOSITE
1BaSB11_SBONC6				chr4	48826410		1
1BaSB11_SBONC6				chr4	48859400	29
1BaSB11_SBONC6	zgc:174694	3 prime	108.423 kb	chr4	49605676	2		OPPOSITE
1BaSB11_SBONC6	zgc:174694	intron 2	within gene	chr4	50066300		1	SAME
1BaSB11_SBONC6				chr4	50390670	1
1BaSB11_SBONC6	zgc:174654	5 prime	87.891 kb	chr4	51633348	1		OPPOSITE
1BaSB11_SBONC6	zgc:173703	3 prime	59.710 kb	chr4	52030838	5		OPPOSITE
1BaSB11_SBONC6	zgc:173703	3 prime	81.977 kb	chr4	52053105		1	SAME
1BaSB11_SBONC6	zgc:113135	intron 4	within gene	chr4	52728438		1	SAME
1BaSB11_SBONC6	si:dkeyp-4c4.1	intron 1	within gene	chr4	54633792	1		OPPOSITE
1BaSB11_SBONC6				chr4	55577692	1
1BaSB11_SBONC6	zgc:173711	intron 4	within gene	chr4	56539746	724	1342	OPPOSITE
1BaSB11_SBONC6	zgc:173711	intron 4	within gene	chr4	56646072	1		SAME
1BaSB11_SBONC6	zgc:174275	3 prime	6.743 kb	chr4	57197425	7	1	OPPOSITE
1BaSB11_SBONC6				chr4	57325529	2
1BaSB11_SBONC6				chr4	57341902		3
1BaSB11_SBONC6				chr4	57371417	8	1
1BaSB11_SBONC6	LOC794656	3 prime	13.219 kb	chr4	58794616	1		OPPOSITE
1BaSB11_SBONC6				chr4	58974950		1
1BaSB11_SBONC6				chr4	59317722	1
1BaSB11_SBONC6				chr4	59712273	1
1BaSB11_SBONC6	zgc:173710	intron 1	within gene	chr4	60272342	1		OPPOSITE
1BaSB11_SBONC6	zgc:173710	3 prime	29.081 kb	chr4	60326670		111	OPPOSITE
1BaSB11_SBONC6				chr4	61592941	350	1
1BaSB11_SBONC6				chr4	62334581	5	4
1BaSB11_SBONC6				chr4	62404103		1
1BaSB11_SBONC6				chr4	64559984	32
1BaSB11_SBONC6				chr4	64741031	1
1BaSB11_SBONC6				chr4	65070831	2
1BaSB11_SBONC6				chr4	65376952	1
1BaSB11_SBONC6	zgc:165515	5 prime	93.183 kb	chr4	65720672	461		OPPOSITE
1BaSB11_SBONC6	zgc:175107	3 prime	83.352 kb	chr4	65870188	3		SAME
1BaSB11_SBONC6	large	5 prime	82.093 kb	chr4	66795970	1	1	SAME
1BaSB11_SBONC6	zgc:85924	3 prime	7.561 kb	chr4	67019282	1		OPPOSITE
1BaSB11_SBONC6	zgc:85924	3 prime	33.530 kb	chr4	67045251	12		OPPOSITE
1BaSB11_SBONC6				chr4	67398323	1
1BaSB11_SBONC6				chr4	67583296		104
1BaSB11_SBONC6	LOC560232	3 prime	15.959 kb	chr4	67915132	1		SAME
1BaSB11_SBONC6	LOC560232	3 prime	86.448 kb	chr4	67985621	23		OPPOSITE
1BaSB11_SBONC6				chr4	68539289	2
1BaSB11_SBONC6				chr4	68602148	4
1BaSB11_SBONC6				chr4	68665730		1
1BaSB11_SBONC6	zgc:162948	5 prime	52.719 kb	chr4	68757403	3		OPPOSITE
1BaSB11_SBONC6	zgc:162948	5 prime	12.425 kb	chr4	68797697		1	OPPOSITE
1BaSB11_SBONC6	dopey2	3 prime	22.252 kb	chr4	68974438	2		OPPOSITE
1BaSB11_SBONC6	ms4a17a.4	3 prime	69.629 kb	chr4	69176968		1	SAME
1BaSB11_SBONC6	ms4a17a.4	3 prime	16.695 kb	chr4	69229902	1		OPPOSITE
1BaSB11_SBONC6	ms4a17a.4	3 prime	16.694 kb	chr4	69229903	1854		OPPOSITE
1BaSB11_SBONC6	ms4a17a.11	5 prime	21.125 kb	chr4	69444667	1		OPPOSITE
1BaSB11_SBONC6	zgc:110171	intron 3	within gene	chr4	70726409	5		OPPOSITE
1BaSB11_SBONC6	zgc:171673	3 prime	6.987 kb	chr4	71035324	29		SAME
1BaSB11_SBONC6	zgc:175286	intron 6	within gene	chr4	71433838	1		SAME
1BaSB11_SBONC6	zgc:136597	intron 1	within gene	chr5	572958		1	OPPOSITE
1BaSB11_SBONC6	zgc:175146	intron 5	within gene	chr5	2349182		1	OPPOSITE
1BaSB11_SBONC6	zgc:56326	5 prime	11.125 kb	chr5	2479850	1		SAME
1BaSB11_SBONC6	zgc:56326	5 prime	19.961 kb	chr5	2488686		169	SAME
1BaSB11_SBONC6	ggnbp2	intron 11	within gene	chr5	2634784	6	3	OPPOSITE
1BaSB11_SBONC6	dhrs11a	3 prime	74.471 kb	chr5	2807236	3		OPPOSITE
1BaSB11_SBONC6				chr5	3294443	2
1BaSB11_SBONC6				chr5	3351963	1
1BaSB11_SBONC6	pxn	intron 5	within gene	chr5	3766796	4		SAME
1BaSB11_SBONC6	ostf1	5 prime	22.763 kb	chr5	3834558	1		SAME
1BaSB11_SBONC6	elac1	3 prime	68.479 kb	chr5	3998955	2		OPPOSITE
1BaSB11_SBONC6				chr5	4563191		1
1BaSB11_SBONC6	bmpr1ba	5 prime	5.807 kb	chr5	4780287	1		OPPOSITE
1BaSB11_SBONC6	lmbrd2a	exon 4	within gene	chr5	5653924	624		SAME
1BaSB11_SBONC6	lmbrd2a	intron 6	within gene	chr5	5657305		1	OPPOSITE
1BaSB11_SBONC6	spef2	intron 13	within gene	chr5	5773953		7	OPPOSITE
1BaSB11_SBONC6	lifra	intron 11	within gene	chr5	5816285		1	SAME
1BaSB11_SBONC6	paip1	intron 10	within gene	chr5	6429311	2		SAME
1BaSB11_SBONC6	pdlim5	intron 6	within gene	chr5	6618869	1		OPPOSITE
1BaSB11_SBONC6	rchy1	5 prime	27.344 kb	chr5	7062162	33		SAME
1BaSB11_SBONC6	si:ch211-12e13.7	3 prime	3.633 kb	chr5	7107576	1		SAME
1BaSB11_SBONC6				chr5	7436202	1
1BaSB11_SBONC6				chr5	7514725	176
1BaSB11_SBONC6	si:ch211-241p16.1	intron 1	within gene	chr5	7995618	1		OPPOSITE
1BaSB11_SBONC6	LOC553308	3 prime	52.472 kb	chr5	8405060		1	OPPOSITE
1BaSB11_SBONC6	zgc:171781	3 prime	7.197 kb	chr5	8491635		49	OPPOSITE
1BaSB11_SBONC6	zgc:171781	3 prime	90.177 kb	chr5	8574615	2		SAME
1BaSB11_SBONC6	LOC100150876	intron 18	within gene	chr5	9847942	1		OPPOSITE
1BaSB11_SBONC6	ppil2	intron 12	within gene	chr5	10153174	173	6	SAME
1BaSB11_SBONC6	ppil2	3 prime	20.576 kb	chr5	10209696	21		OPPOSITE
1BaSB11_SBONC6	si:ch211-255a21.1	3 prime	23.361 kb	chr5	11112360	1		SAME
1BaSB11_SBONC6	zgc:110112	3 prime	27.960 kb	chr5	12025732		1	OPPOSITE
1BaSB11_SBONC6	hspb8	5 prime	57.528 kb	chr5	12734120	4		OPPOSITE
1BaSB11_SBONC6				chr5	12806793	1
1BaSB11_SBONC6	tbx1	exon 1	within gene	chr5	13490831		1	SAME
1BaSB11_SBONC6				chr5	13600123	77
1BaSB11_SBONC6				chr5	13654598	1
1BaSB11_SBONC6				chr5	13765470	1
1BaSB11_SBONC6				chr5	13765563	2
1BaSB11_SBONC6				chr5	14062512		6
1BaSB11_SBONC6	LOC794865	3 prime	27.256 kb	chr5	14536680	1		OPPOSITE
1BaSB11_SBONC6	LOC794865	3 prime	42.093 kb	chr5	14551517		1	SAME
1BaSB11_SBONC6	gpr74	intron 1	within gene	chr5	14603961	1		OPPOSITE
1BaSB11_SBONC6	gpr74	3 prime	22.236 kb	chr5	14676010		1	SAME
1BaSB11_SBONC6	gpr74	3 prime	28.139 kb	chr5	14681913		1	OPPOSITE
1BaSB11_SBONC6	hk2	5 prime	193.013 kb	chr5	14929738	11		SAME
1BaSB11_SBONC6	hk2	intron 5	within gene	chr5	15023847	1	1	OPPOSITE
1BaSB11_SBONC6				chr5	15278859	2
1BaSB11_SBONC6				chr5	15365082	966
1BaSB11_SBONC6				chr5	15537501	8
1BaSB11_SBONC6	si:dkey-69h6.7	3 prime	73.757 kb	chr5	15807215		3	SAME
1BaSB11_SBONC6				chr5	16674270	1
1BaSB11_SBONC6	aacs	3 prime	123.727 kb	chr5	16792734	1		OPPOSITE
1BaSB11_SBONC6	rad23b	3 prime	71.861 kb	chr5	17141274	1		OPPOSITE
1BaSB11_SBONC6				chr5	17218883	2
1BaSB11_SBONC6	usp30	5 prime	14.955 kb	chr5	18089395	1		OPPOSITE
1BaSB11_SBONC6	si:ch211-191d15.2	3 prime	9.575 kb	chr5	18375236	1		SAME
1BaSB11_SBONC6	si:dkey-174n20.1	3 prime	39.957 kb	chr5	18906926		1	SAME
1BaSB11_SBONC6	si:dkey-174n20.1	3 prime	68.290 kb	chr5	18935259	8		OPPOSITE
1BaSB11_SBONC6	hs3st1l2	5 prime	112.131 kb	chr5	18967744		1	OPPOSITE
1BaSB11_SBONC6				chr5	19455880	1
1BaSB11_SBONC6	tnfsf10l4	3 prime	83.896 kb	chr5	19527877	1		OPPOSITE
1BaSB11_SBONC6	zc4h2	5 prime	21.194 kb	chr5	20134325	1		SAME
1BaSB11_SBONC6	mir223	5 prime	26.172 kb	chr5	20290151		1	SAME
1BaSB11_SBONC6	mir223	5 prime	83.406 kb	chr5	20347385		10	OPPOSITE
1BaSB11_SBONC6	zgc:158409	3 prime	3.925 kb	chr5	21006170	12		SAME
1BaSB11_SBONC6	prps1a	5 prime	10.776 kb	chr5	21162802	1		OPPOSITE
1BaSB11_SBONC6	mtmr2	intron 8	within gene	chr5	21646615	60		SAME
1BaSB11_SBONC6	LOC100005195	intron 10	within gene	chr5	22002779		1	OPPOSITE
1BaSB11_SBONC6	znf703	5 prime	0.737 kb	chr5	22363922	3		SAME
1BaSB11_SBONC6	tia1l	3 prime	76.175 kb	chr5	22471026	2		OPPOSITE
1BaSB11_SBONC6	ewsr1b	3 prime	11.459 kb	chr5	22900399	9		OPPOSITE
1BaSB11_SBONC6	rhbdd3	3 prime	19.542 kb	chr5	22935639	1		SAME
1BaSB11_SBONC6	abca2	5 prime	36.707 kb	chr5	23240654	11		OPPOSITE
1BaSB11_SBONC6	anxa1a	3 prime	67.943 kb	chr5	23487034		3	SAME
1BaSB11_SBONC6	cyp1d1	intron 1	within gene	chr5	23592535		1	OPPOSITE
1BaSB11_SBONC6	cyp1d1	5 prime	19.945 kb	chr5	23613117		1	OPPOSITE
1BaSB11_SBONC6	tmem2	3 prime	45.143 kb	chr5	23830610	3	1	OPPOSITE
1BaSB11_SBONC6	dhfr	intron 5	within gene	chr5	24116203	2		OPPOSITE
1BaSB11_SBONC6	si:ch211-173n20.1	intron 5	within gene	chr5	24325584	1		SAME
1BaSB11_SBONC6	si:ch211-173n20.1	5 prime	4.528 kb	chr5	24469633	659		OPPOSITE
1BaSB11_SBONC6	hdr	5 prime	89.526 kb	chr5	25449482	130		SAME
1BaSB11_SBONC6				chr5	25848842	1
1BaSB11_SBONC6	abcb9	exon 11	within gene	chr5	26149096		1	OPPOSITE
1BaSB11_SBONC6	zgc:158437	3 prime	49.701 kb	chr5	26227734		2	SAME
1BaSB11_SBONC6	vamp8	3 prime	78.615 kb	chr5	26488304		3	SAME
1BaSB11_SBONC6	nelf	intron 1	within gene	chr5	26565878	1		OPPOSITE
1BaSB11_SBONC6	zgc:162228	intron 5	within gene	chr5	26858760	2		SAME
1BaSB11_SBONC6	si:rp71-10d23.3	5 prime	56.665 kb	chr5	27020580	1		OPPOSITE
1BaSB11_SBONC6	cacna1ba	intron 8	within gene	chr5	27452237	1		OPPOSITE
1BaSB11_SBONC6	cacna1ba	intron 6	within gene	chr5	27492602	1		OPPOSITE
1BaSB11_SBONC6	cacna1ba	intron 3	within gene	chr5	27549383	21		OPPOSITE
1BaSB11_SBONC6	grin1b	intron 2	within gene	chr5	27716968	2	1	OPPOSITE
1BaSB11_SBONC6	LOC569571	3 prime	65.690 kb	chr5	28406605		1	OPPOSITE
1BaSB11_SBONC6	si:ch211-117m20.9	5 prime	5.921 kb	chr5	29172968	12		OPPOSITE
1BaSB11_SBONC6	camkk1	5 prime	96.006 kb	chr5	29438945		1	OPPOSITE
1BaSB11_SBONC6	sh3glb2	intron 1	within gene	chr5	29786896	1		SAME
1BaSB11_SBONC6	dpm2	intron 1	within gene	chr5	29818563	4		SAME
1BaSB11_SBONC6	tmem119b	5 prime	17.554 kb	chr5	29995068	4		OPPOSITE
1BaSB11_SBONC6	ppp6c	5 prime	40.096 kb	chr5	30057534		1	SAME
1BaSB11_SBONC6	zgc:77891	5 prime	11.687 kb	chr5	30239068	109		SAME
1BaSB11_SBONC6	myhz2	5 prime	29.431 kb	chr5	30290399	1		SAME
1BaSB11_SBONC6	fbxw2	5 prime	1.800 kb	chr5	30500984	1		OPPOSITE
1BaSB11_SBONC6	fbxw2	5 prime	2.328 kb	chr5	30501512		1	OPPOSITE
1BaSB11_SBONC6	pcsk5b	5 prime	35.974 kb	chr5	30807690		5	SAME
1BaSB11_SBONC6	rpl12	intron 2	within gene	chr5	31211139		363	OPPOSITE
1BaSB11_SBONC6	LOC100001344	3 prime	67.908 kb	chr5	31474298	2		OPPOSITE
1BaSB11_SBONC6	LOC100000754	3 prime	35.700 kb	chr5	31890249		1	OPPOSITE
1BaSB11_SBONC6	LOC100000754	3 prime	61.812 kb	chr5	31916361	2		OPPOSITE
1BaSB11_SBONC6	si:dkeyp-72a4.1	intron 1	within gene	chr5	32246313	1		OPPOSITE
1BaSB11_SBONC6				chr5	32670431	5
1BaSB11_SBONC6	hexa	5 prime	62.327 kb	chr5	32995101	7		OPPOSITE
1BaSB11_SBONC6	foxd1l	3 prime	9.441 kb	chr5	33379587	169		SAME
1BaSB11_SBONC6	map1b	5 prime	29.641 kb	chr5	33757991		1	OPPOSITE
1BaSB11_SBONC6	ar	intron 1	within gene	chr5	34018851	432		SAME
1BaSB11_SBONC6	si:ch211-124k10.2	intron 1	within gene	chr5	34247427		1	OPPOSITE
1BaSB11_SBONC6	zgc:103697	3 prime	60.597 kb	chr5	34485701	3		OPPOSITE
1BaSB11_SBONC6	zgc:103697	3 prime	60.599 kb	chr5	34485703	1		OPPOSITE
1BaSB11_SBONC6	zgc:163098	exon 18	within gene	chr5	34672346		42	OPPOSITE
1BaSB11_SBONC6	zgc:163098	exon 18	within gene	chr5	34672348		1	OPPOSITE
1BaSB11_SBONC6	zgc:163098	5 prime	53.298 kb	chr5	34739380	5		OPPOSITE
1BaSB11_SBONC6	il13ra2	5 prime	64.655 kb	chr5	34809622	1		OPPOSITE
1BaSB11_SBONC6	alkbh6	5 prime	12.122 kb	chr5	35341794	2	2	OPPOSITE
1BaSB11_SBONC6	LOC567472	5 prime	9.162 kb	chr5	36439092	3		SAME
1BaSB11_SBONC6	gnb2	intron 1	within gene	chr5	36949298	1		SAME
1BaSB11_SBONC6	cnot6l	exon 10	within gene	chr5	37508992	25	3	OPPOSITE
1BaSB11_SBONC6	antxr2a	5 prime	12.729 kb	chr5	38223472		1	OPPOSITE
1BaSB11_SBONC6				chr5	38648954	2
1BaSB11_SBONC6				chr5	38649046		1
1BaSB11_SBONC6				chr5	38650470		1
1BaSB11_SBONC6	golph3	3 prime	85.257 kb	chr5	40030392	1		SAME
1BaSB11_SBONC6	ncor1	5 prime	38.984 kb	chr5	41047500	1		OPPOSITE
1BaSB11_SBONC6	si:dkey-9e15.1	5 prime	0.665 kb	chr5	41192875	1		OPPOSITE
1BaSB11_SBONC6	rufy3	3 prime	7.173 kb	chr5	41972790		1	SAME
1BaSB11_SBONC6	zgc:100930	5 prime	26.167 kb	chr5	42089123	73		SAME
1BaSB11_SBONC6	rhobtb2a	3 prime	41.163 kb	chr5	42549135	1		SAME
1BaSB11_SBONC6	si:dkey-40c11.1	intron 2	within gene	chr5	42642810	1		SAME
1BaSB11_SBONC6	nos2a	5 prime	22.923 kb	chr5	42779072	8		SAME
1BaSB11_SBONC6	zgc:112966	3 prime	73.490 kb	chr5	42952011		4	SAME
1BaSB11_SBONC6	si:ch211-66i11.1	intron 1	within gene	chr5	43662224	38		SAME
1BaSB11_SBONC6	dmrt2a	3 prime	29.875 kb	chr5	44047055		1	SAME
1BaSB11_SBONC6	si:xx-bac7cse.2	intron 2	within gene	chr5	45422186	1		OPPOSITE
1BaSB11_SBONC6	si:xx-bac7cse.2	intron 2	within gene	chr5	45471865	3156		OPPOSITE
1BaSB11_SBONC6	si:xx-bac7cse.2	intron 2	within gene	chr5	45491150	2	3	SAME
1BaSB11_SBONC6				chr5	46694658		1
1BaSB11_SBONC6	hapln1a	5 prime	56.949 kb	chr5	47011420		97	OPPOSITE
1BaSB11_SBONC6	LOC794173	3 prime	109.624 kb	chr5	47384581	3		SAME
1BaSB11_SBONC6	LOC794173	3 prime	89.483 kb	chr5	47404722		1	SAME
1BaSB11_SBONC6	si:ch211-130m23.3	exon 17	within gene	chr5	47581191	535		OPPOSITE
1BaSB11_SBONC6	iqgap2	intron 1	within gene	chr5	47703178		323	SAME
1BaSB11_SBONC6	slc4a4a	intron 22	within gene	chr5	48032594	1		SAME
1BaSB11_SBONC6	slc4a4a	intron 22	within gene	chr5	48033001	2		SAME
1BaSB11_SBONC6	slc4a4a	3 prime	21.887 kb	chr5	48062622	1275		SAME
1BaSB11_SBONC6	zgc:158260	5 prime	32.027 kb	chr5	48203472	1		OPPOSITE
1BaSB11_SBONC6	si:ch211-117c19.3	5 prime	22.257 kb	chr5	48454645	4		SAME
1BaSB11_SBONC6	LOC556154	intron 6	within gene	chr5	48499180	41		OPPOSITE
1BaSB11_SBONC6	ccnh	3 prime	62.033 kb	chr5	48887874		1	SAME
1BaSB11_SBONC6	ccnh	5 prime	30.082 kb	chr5	48979989	1		SAME
1BaSB11_SBONC6	tmem161b	intron 1	within gene	chr5	49043148	589		SAME
1BaSB11_SBONC6	mef2cb	intron 8	within gene	chr5	49158433	245		SAME
1BaSB11_SBONC6	mef2cb	5 prime	3.129 kb	chr5	49237741	1		SAME
1BaSB11_SBONC6				chr5	49342205	1
1BaSB11_SBONC6	gpr98	intron 19	within gene	chr5	49730794	1		OPPOSITE
1BaSB11_SBONC6	arrdc3	5 prime	50.727 kb	chr5	50080158	3		SAME
1BaSB11_SBONC6	arrdc3	5 prime	85.142 kb	chr5	50114573	60		SAME
1BaSB11_SBONC6				chr5	50484387	1
1BaSB11_SBONC6	fam172a	intron 10	within gene	chr5	50874466	31		OPPOSITE
1BaSB11_SBONC6				chr5	51289103	164
1BaSB11_SBONC6				chr5	51381846		192
1BaSB11_SBONC6				chr5	51719863		1
1BaSB11_SBONC6	rasgrf2	intron 1	within gene	chr5	52671283	6		OPPOSITE
1BaSB11_SBONC6	thbs4a	intron 1	within gene	chr5	53162856		2	SAME
1BaSB11_SBONC6	si:dkey-151g22.1	5 prime	79.944 kb	chr5	53666363		1	SAME
1BaSB11_SBONC6	si:ch211-268m12.6	5 prime	10.456 kb	chr5	54780711	1		SAME
1BaSB11_SBONC6	zgc:136755	5 prime	141.973 kb	chr5	55000336	563		SAME
1BaSB11_SBONC6	zgc:136755	5 prime	100.322 kb	chr5	55041987	4		SAME
1BaSB11_SBONC6	zgc:136755	5 prime	95.301 kb	chr5	55047008	3		SAME
1BaSB11_SBONC6	zgc:100974	exon 4	within gene	chr5	55675446		1	OPPOSITE
1BaSB11_SBONC6				chr5	55834917	1	4
1BaSB11_SBONC6	mks1	3 prime	55.738 kb	chr5	56842508	11		SAME
1BaSB11_SBONC6	lhx1b	5 prime	65.283 kb	chr5	57102882	2000		SAME
1BaSB11_SBONC6				chr5	57693118	3
1BaSB11_SBONC6	zgc:103518	5 prime	3.269 kb	chr5	57835452	2		OPPOSITE
1BaSB11_SBONC6	tmem232	3 prime	8.014 kb	chr5	57913245	1		SAME
1BaSB11_SBONC6	zgc:193711	3 prime	27.899 kb	chr5	58556614	30		OPPOSITE
1BaSB11_SBONC6	sik2a	5 prime	3.606 kb	chr5	58801334	1		SAME
1BaSB11_SBONC6	si:dkey-27p23.3	3 prime	28.057 kb	chr5	58869569	1		SAME
1BaSB11_SBONC6	drd2b	5 prime	11.346 kb	chr5	59099865	1		SAME
1BaSB11_SBONC6	scarb2	3 prime	39.714 kb	chr5	59346910		3	OPPOSITE
1BaSB11_SBONC6	scarb2	exon 13	within gene	chr5	59371807	1		SAME
1BaSB11_SBONC6	slc37a2	intron 10	within gene	chr5	59816774		258	SAME
1BaSB11_SBONC6	slc37a2	3 prime	64.027 kb	chr5	59881980	4	18	SAME
1BaSB11_SBONC6				chr5	60401711	2
1BaSB11_SBONC6	zgc:64116	exon 2	within gene	chr5	60532613	1		SAME
1BaSB11_SBONC6	tmem136	5 prime	46.963 kb	chr5	61289083		5	OPPOSITE
1BaSB11_SBONC6	tmem136	3 prime	8.879 kb	chr5	61344925	19		OPPOSITE
1BaSB11_SBONC6	LOC796981	intron 3	within gene	chr5	61497404	2	2	SAME
1BaSB11_SBONC6	LOC796981	5 prime	18.884 kb	chr5	61527188	1		SAME
1BaSB11_SBONC6	bckdk	intron 4	within gene	chr5	62700418	1		SAME
1BaSB11_SBONC6	ap2b1	intron 15	within gene	chr5	62874613	1	1	SAME
1BaSB11_SBONC6	ap2b1	3 prime	2.235 kb	chr5	62903272		1	SAME
1BaSB11_SBONC6	ap2b1	3 prime	2.255 kb	chr5	62903292	1		OPPOSITE
1BaSB11_SBONC6				chr5	63165847	1
1BaSB11_SBONC6	sepw1	3 prime	97.441 kb	chr5	63426636		3	SAME
1BaSB11_SBONC6	sepw1	3 prime	20.498 kb	chr5	63503579	133		SAME
1BaSB11_SBONC6	sepw1	5 prime	27.898 kb	chr5	63551975	1		OPPOSITE
1BaSB11_SBONC6	adora2b	5 prime	7.655 kb	chr5	64005204	1		SAME
1BaSB11_SBONC6	adora2b	5 prime	16.795 kb	chr5	64014344		1	SAME
1BaSB11_SBONC6				chr5	64133226	1
1BaSB11_SBONC6				chr5	64211263	1
1BaSB11_SBONC6				chr5	64634814	1
1BaSB11_SBONC6	cox7c	5 prime	36.441 kb	chr5	64797541	1	1	OPPOSITE
1BaSB11_SBONC6				chr5	64899808		3
1BaSB11_SBONC6	gsnb	5 prime	22.909 kb	chr5	65274128		72	SAME
1BaSB11_SBONC6	ciz1	5 prime	33.296 kb	chr5	65509766		24	OPPOSITE
1BaSB11_SBONC6	ak5l	5 prime	5.408 kb	chr5	66108316		1	SAME
1BaSB11_SBONC6	zgc:110283	intron 8	within gene	chr5	66177763	2		OPPOSITE
1BaSB11_SBONC6	pmpca	3 prime	4.611 kb	chr5	66247694	2		OPPOSITE
1BaSB11_SBONC6	col27a1b	intron 4	within gene	chr5	66709097	4		SAME
1BaSB11_SBONC6	zgc:101858	intron 4	within gene	chr5	66991641	1		OPPOSITE
1BaSB11_SBONC6	zgc:153753	intron 2	within gene	chr5	67011244	428		OPPOSITE
1BaSB11_SBONC6	camsap1b	intron 2	within gene	chr5	67356289	82		OPPOSITE
1BaSB11_SBONC6	camsap1b	5 prime	14.166 kb	chr5	67389747	2	1	SAME
1BaSB11_SBONC6	notch1b	intron 4	within gene	chr5	67456472	1		OPPOSITE
1BaSB11_SBONC6	tmem8c	5 prime	91.506 kb	chr5	67588481	1		OPPOSITE
1BaSB11_SBONC6				chr5	68150931	2
1BaSB11_SBONC6	htatip	exon 11	within gene	chr5	68284835		1	SAME
1BaSB11_SBONC6	htatip	intron 7	within gene	chr5	68290929		2	OPPOSITE
1BaSB11_SBONC6	si:ch211-173b8.2	3 prime	21.955 kb	chr5	68577820		1	SAME
1BaSB11_SBONC6	prlrb	3 prime	90.331 kb	chr5	68875383		3	SAME
1BaSB11_SBONC6	si:dkey-251i10.1	3 prime	19.280 kb	chr5	69203524		1	OPPOSITE
1BaSB11_SBONC6	rsrc2	3 prime	7.512 kb	chr5	69402679	1356		SAME
1BaSB11_SBONC6	zgc:73336	exon 4	within gene	chr5	69548757	298		OPPOSITE
1BaSB11_SBONC6	zgc:158317	intron 1	within gene	chr5	69763869	1		SAME
1BaSB11_SBONC6	zgc:101780	intron 1	within gene	chr5	69874776	252		OPPOSITE
1BaSB11_SBONC6	mepce	3 prime	71.775 kb	chr5	70381036	4		OPPOSITE
1BaSB11_SBONC6	spaw	3 prime	3.199 kb	chr5	70558424		1	OPPOSITE
1BaSB11_SBONC6	ank1	3 prime	13.421 kb	chr5	70573382		1	OPPOSITE
1BaSB11_SBONC6				chr5	70721378		9
1BaSB11_SBONC6	sepm	intron 4	within gene	chr5	70855571	1		OPPOSITE
1BaSB11_SBONC6	ugt2a2	5 prime	113.429 kb	chr5	71117819		1	OPPOSITE
1BaSB11_SBONC6	eif2b1	intron 1	within gene	chr5	71681570	34		OPPOSITE
1BaSB11_SBONC6	aldh2b	intron 1	within gene	chr5	71710281	36		SAME
1BaSB11_SBONC6	zgc:153044	3 prime	4.756 kb	chr5	71798284	29		OPPOSITE
1BaSB11_SBONC6	zgc:175280	5 prime	34.875 kb	chr5	72088757		17	OPPOSITE
1BaSB11_SBONC6	gtf3aa	5 prime	16.229 kb	chr5	72112800	1		SAME
1BaSB11_SBONC6	gtf3aa	5 prime	15.200 kb	chr5	72113829		2	SAME
1BaSB11_SBONC6	gtf3aa	3 prime	27.650 kb	chr5	72156679	1		OPPOSITE
1BaSB11_SBONC6	h1m	intron 1	within gene	chr5	72469476		1	OPPOSITE
1BaSB11_SBONC6				chr5	72574858	3
1BaSB11_SBONC6				chr5	72583495	3
1BaSB11_SBONC6				chr5	72593286	1
1BaSB11_SBONC6				chr5	72596138	1
1BaSB11_SBONC6				chr5	72721531	2
1BaSB11_SBONC6	zgc:113443	5 prime	31.054 kb	chr5	73032343	2		SAME
1BaSB11_SBONC6	zgc:113443	3 prime	67.123 kb	chr5	73130520	1		SAME
1BaSB11_SBONC6	zgc:63667	5 prime	52.530 kb	chr5	73293990	885		OPPOSITE
1BaSB11_SBONC6	zgc:63667	5 prime	62.588 kb	chr5	73304048	6		SAME
1BaSB11_SBONC6				chr5	73366536	2	1
1BaSB11_SBONC6	fam78a	5 prime	44.957 kb	chr5	73790628	1	1	SAME
1BaSB11_SBONC6	zgc:91930	3 prime	7.970 kb	chr5	73999786		1	SAME
1BaSB11_SBONC6	rabl4	5 prime	25.967 kb	chr6	345599	2		SAME
1BaSB11_SBONC6	cyth4b	intron 1	within gene	chr6	417519	2		OPPOSITE
1BaSB11_SBONC6				chr6	1325937	39
1BaSB11_SBONC6	plxna1	3 prime	200.805 kb	chr6	1404657	2		SAME
1BaSB11_SBONC6	zgc:158824	3 prime	25.066 kb	chr6	1796821	1		SAME
1BaSB11_SBONC6	tgm2b	intron 10	within gene	chr6	2197401	2		OPPOSITE
1BaSB11_SBONC6				chr6	2652633	1
1BaSB11_SBONC6	quo	intron 3	within gene	chr6	2863042	1		SAME
1BaSB11_SBONC6	quo	intron 3	within gene	chr6	3084620	3		SAME
1BaSB11_SBONC6	quo	intron 3	within gene	chr6	3100363		329	OPPOSITE
1BaSB11_SBONC6	kbtbd10b	5 prime	84.836 kb	chr6	4068289	764		SAME
1BaSB11_SBONC6	kbtbd10b	5 prime	47.507 kb	chr6	4105618	3		OPPOSITE
1BaSB11_SBONC6	ssb	exon 10	within gene	chr6	4189104	1		SAME
1BaSB11_SBONC6	st3gal3	5 prime	106.203 kb	chr6	4591532	1		OPPOSITE
1BaSB11_SBONC6	st3gal3	3 prime	29.541 kb	chr6	4727276		118	OPPOSITE
1BaSB11_SBONC6				chr6	5350222	46
1BaSB11_SBONC6				chr6	5358639	1	2
1BaSB11_SBONC6				chr6	5419980		1
1BaSB11_SBONC6				chr6	5745113		1
1BaSB11_SBONC6				chr6	5755981	1
1BaSB11_SBONC6				chr6	5841384		1
1BaSB11_SBONC6	hars2	3 prime	24.299 kb	chr6	7173587	3		SAME
1BaSB11_SBONC6	bin1	intron 4	within gene	chr6	7525730	2		OPPOSITE
1BaSB11_SBONC6	abcc4	intron 29	within gene	chr6	7908688	4		OPPOSITE
1BaSB11_SBONC6	pa2g4a	3 prime	99.045 kb	chr6	8143058	1		SAME
1BaSB11_SBONC6	myh9l2	intron 13	within gene	chr6	8436638	2		SAME
1BaSB11_SBONC6	LOC100002901	3 prime	27.364 kb	chr6	8500897	2		OPPOSITE
1BaSB11_SBONC6	zgc:158252	intron 1	within gene	chr6	8794686	1		OPPOSITE
1BaSB11_SBONC6	zgc:158252	3 prime	6.185 kb	chr6	8868601	1		OPPOSITE
1BaSB11_SBONC6	zgc:114087	3 prime	19.296 kb	chr6	9472170		2	OPPOSITE
1BaSB11_SBONC6	zgc:112392	3 prime	10.819 kb	chr6	10003497	1		SAME
1BaSB11_SBONC6	zgc:136817	intron 1	within gene	chr6	10170547	3		OPPOSITE
1BaSB11_SBONC6	cdk15	intron 8	within gene	chr6	10749781	7		SAME
1BaSB11_SBONC6	cdk15	5 prime	2.619 kb	chr6	10784754	2		OPPOSITE
1BaSB11_SBONC6	scn1lab	3 prime	69.618 kb	chr6	11194384		1	SAME
1BaSB11_SBONC6	ola1	3 prime	30.114 kb	chr6	11681047	3	1	SAME
1BaSB11_SBONC6	ola1	3 prime	21.007 kb	chr6	11690154	1	1	OPPOSITE
1BaSB11_SBONC6	ccr7	3 prime	6.167 kb	chr6	11879307	2		OPPOSITE
1BaSB11_SBONC6	ccr7	5 prime	16.773 kb	chr6	11902247	1		SAME
1BaSB11_SBONC6	sumo3l	5 prime	4.036 kb	chr6	12035639	20		SAME
1BaSB11_SBONC6	sumo3l	5 prime	58.559 kb	chr6	12090162		1	SAME
1BaSB11_SBONC6	atg9a	3 prime	33.178 kb	chr6	12256527	1	6	SAME
1BaSB11_SBONC6	zgc:165617	5 prime	68.141 kb	chr6	12898509		1	OPPOSITE
1BaSB11_SBONC6	gpd2	3 prime	97.800 kb	chr6	13443033	1		OPPOSITE
1BaSB11_SBONC6	nr4a2b	exon 3	within gene	chr6	13544738		1	OPPOSITE
1BaSB11_SBONC6	rprmb	5 prime	32.083 kb	chr6	14512196	1		OPPOSITE
1BaSB11_SBONC6	rprmb	3 prime	20.249 kb	chr6	14564528		1	OPPOSITE
1BaSB11_SBONC6	accn4b	intron 1	within gene	chr6	14691259	1		SAME
1BaSB11_SBONC6	accn4b	5 prime	28.869 kb	chr6	14772367	2		SAME
1BaSB11_SBONC6				chr6	15051305		1
1BaSB11_SBONC6	si:ch211-107m8.2	intron 15	within gene	chr6	15254781	1043		SAME
1BaSB11_SBONC6	mir153b	5 prime	30.459 kb	chr6	15503991		1	OPPOSITE
1BaSB11_SBONC6				chr6	15949119	1
1BaSB11_SBONC6	zgc:153172	5 prime	103.977 kb	chr6	16179714		1	OPPOSITE
1BaSB11_SBONC6	fhl2b	intron 1	within gene	chr6	16355707	1		OPPOSITE
1BaSB11_SBONC6	zgc:92024	intron 2	within gene	chr6	16479153	5	1	SAME
1BaSB11_SBONC6	zgc:92024	3 prime	30.030 kb	chr6	16529436	1		SAME
1BaSB11_SBONC6	st6gal2-r	3 prime	70.524 kb	chr6	16656481	1		SAME
1BaSB11_SBONC6	zgc:92712	3 prime	60.940 kb	chr6	17722587	1		SAME
1BaSB11_SBONC6	psmb3	5 prime	7.225 kb	chr6	17930519		1	OPPOSITE
1BaSB11_SBONC6	psmb3	5 prime	50.488 kb	chr6	17973782		1	OPPOSITE
1BaSB11_SBONC6				chr6	18176811	2
1BaSB11_SBONC6	stx8	intron 6	within gene	chr6	20357433	116		OPPOSITE
1BaSB11_SBONC6	ntn1a	intron 1	within gene	chr6	20449743	1		SAME
1BaSB11_SBONC6	ntn1a	5 prime	57.652 kb	chr6	20559274		25	SAME
1BaSB11_SBONC6				chr6	20643343		93
1BaSB11_SBONC6				chr6	20796158	70
1BaSB11_SBONC6				chr6	20882872	8
1BaSB11_SBONC6	acox1	3 prime	69.719 kb	chr6	21495141	1		OPPOSITE
1BaSB11_SBONC6				chr6	21573479	1
1BaSB11_SBONC6				chr6	21695937	1
1BaSB11_SBONC6				chr6	21697895	32
1BaSB11_SBONC6				chr6	21727597		1
1BaSB11_SBONC6				chr6	21739514	1
1BaSB11_SBONC6				chr6	21739516	1
1BaSB11_SBONC6				chr6	21814336	2
1BaSB11_SBONC6	aanat1	3 prime	64.901 kb	chr6	21859108	1		SAME
1BaSB11_SBONC6				chr6	22146223	26
1BaSB11_SBONC6	si:dkey-91f15.1	5 prime	18.480 kb	chr6	22841072	1		OPPOSITE
1BaSB11_SBONC6	si:dkey-91f15.6	3 prime	42.257 kb	chr6	23048461		235	SAME
1BaSB11_SBONC6	cacng1	3 prime	79.950 kb	chr6	23229946	2		OPPOSITE
1BaSB11_SBONC6	cacng1	3 prime	62.639 kb	chr6	23247257	75	30	SAME
1BaSB11_SBONC6	zgc:163086	5 prime	98.119 kb	chr6	23741770	2	1	OPPOSITE
1BaSB11_SBONC6	gga1	exon 16	within gene	chr6	23940615	5		OPPOSITE
1BaSB11_SBONC6	rae1	5 prime	34.091 kb	chr6	24122421	2		SAME
1BaSB11_SBONC6	nprl2	5 prime	57.496 kb	chr6	24249074	3		SAME
1BaSB11_SBONC6	nprl2	5 prime	57.498 kb	chr6	24249076	1		SAME
1BaSB11_SBONC6	nprl2	5 prime	90.538 kb	chr6	24282116		9	OPPOSITE
1BaSB11_SBONC6				chr6	24623533		1
1BaSB11_SBONC6				chr6	24663658		1
1BaSB11_SBONC6	zgc:158654	3 prime	0.290 kb	chr6	25534948		1	OPPOSITE
1BaSB11_SBONC6	gadd45ab	5 prime	11.866 kb	chr6	25687116	2		OPPOSITE
1BaSB11_SBONC6				chr6	26215928	38
1BaSB11_SBONC6				chr6	26454480	2
1BaSB11_SBONC6				chr6	26486201		2
1BaSB11_SBONC6				chr6	26498489	1
1BaSB11_SBONC6	barhl2	exon 1	within gene	chr6	26618997		308	SAME
1BaSB11_SBONC6				chr6	27775241	1
1BaSB11_SBONC6	sox14	3 prime	77.071 kb	chr6	28068661	384		SAME
1BaSB11_SBONC6	sox14	5 prime	60.551 kb	chr6	28206283		79	SAME
1BaSB11_SBONC6	zgc:171514	5 prime	57.607 kb	chr6	28889200		1	OPPOSITE
1BaSB11_SBONC6	cep63	3 prime	32.555 kb	chr6	29615843	44		OPPOSITE
1BaSB11_SBONC6	lpp	intron 3	within gene	chr6	30170039	572		OPPOSITE
1BaSB11_SBONC6	lpp	intron 3	within gene	chr6	30170041	1		OPPOSITE
1BaSB11_SBONC6	lpp	intron 5	within gene	chr6	30319616		2	SAME
1BaSB11_SBONC6	tprg1	3 prime	52.209 kb	chr6	30608959	1		OPPOSITE
1BaSB11_SBONC6	tp63	intron 2	within gene	chr6	30650607		1	SAME
1BaSB11_SBONC6	tbc1d23	5 prime	1.504 kb	chr6	30710994	1	14	OPPOSITE
1BaSB11_SBONC6	si:dkey-98p3.1	3 prime	30.746 kb	chr6	30989539	4	8	SAME
1BaSB11_SBONC6	zgc:172121	3 prime	3.930 kb	chr6	31205194		2	OPPOSITE
1BaSB11_SBONC6	dlg1	intron 4	within gene	chr6	31805397		1	OPPOSITE
1BaSB11_SBONC6	dlg1	intron 4	within gene	chr6	31836844	1		OPPOSITE
1BaSB11_SBONC6	ttc4	intron 5	within gene	chr6	32496194	1		SAME
1BaSB11_SBONC6	insl5a	3 prime	47.019 kb	chr6	32571086	1		SAME
1BaSB11_SBONC6	insl5a	3 prime	93.171 kb	chr6	32617238		1	OPPOSITE
1BaSB11_SBONC6	jak1	3 prime	28.744 kb	chr6	33271327	644	1	OPPOSITE
1BaSB11_SBONC6	jak1	3 prime	92.782 kb	chr6	33335365		2	OPPOSITE
1BaSB11_SBONC6				chr6	33396873	3
1BaSB11_SBONC6				chr6	33584824	1
1BaSB11_SBONC6	pgm1	5 prime	1.768 kb	chr6	33843171	1		SAME
1BaSB11_SBONC6	atg4c	3 prime	30.881 kb	chr6	34100268		225	OPPOSITE
1BaSB11_SBONC6	usp1	5 prime	73.887 kb	chr6	34301794		4	SAME
1BaSB11_SBONC6	melk	5 prime	95.483 kb	chr6	34374198	1		SAME
1BaSB11_SBONC6	pbx1a	5 prime	154.413 kb	chr6	34916657	1	1	SAME
1BaSB11_SBONC6				chr6	35355239	1
1BaSB11_SBONC6				chr6	35479128	1
1BaSB11_SBONC6				chr6	35805558		96
1BaSB11_SBONC6				chr6	36293810		526
1BaSB11_SBONC6				chr6	36721984		2
1BaSB11_SBONC6	mafl	5 prime	23.782 kb	chr6	36857958	1		OPPOSITE
1BaSB11_SBONC6	mafl	5 prime	18.051 kb	chr6	36863689	2		OPPOSITE
1BaSB11_SBONC6				chr6	37338483	3
1BaSB11_SBONC6	zgc:175108	3 prime	1.366 kb	chr6	37517722	2446		OPPOSITE
1BaSB11_SBONC6	rgs4	5 prime	75.911 kb	chr6	37905902		1	OPPOSITE
1BaSB11_SBONC6	uhmk1	3 prime	33.872 kb	chr6	38105540		2	SAME
1BaSB11_SBONC6	il23r	intron 7	within gene	chr6	38391801	1		OPPOSITE
1BaSB11_SBONC6				chr6	38646082	3
1BaSB11_SBONC6				chr6	39399934	2
1BaSB11_SBONC6				chr6	39399936	3
1BaSB11_SBONC6				chr6	39465421		1
1BaSB11_SBONC6	lrrc15	3 prime	39.071 kb	chr6	39741105	152		SAME
1BaSB11_SBONC6	her6	5 prime	10.045 kb	chr6	39801095	1		SAME
1BaSB11_SBONC6	her6	5 prime	72.433 kb	chr6	39863483		3	OPPOSITE
1BaSB11_SBONC6	cyfip1	intron 6	within gene	chr6	40165505	1		SAME
1BaSB11_SBONC6	zranb2	5 prime	54.606 kb	chr6	40591300	2		OPPOSITE
1BaSB11_SBONC6	negr1	5 prime	18.817 kb	chr6	40913868	1		OPPOSITE
1BaSB11_SBONC6	vdrb	intron 3	within gene	chr6	42522459	2		SAME
1BaSB11_SBONC6	ttll3	3 prime	83.775 kb	chr6	43841227		1	OPPOSITE
1BaSB11_SBONC6	ttll3	5 prime	6.205 kb	chr6	43931207	1		SAME
1BaSB11_SBONC6	prkcd	intron 1	within gene	chr6	44102061		1	OPPOSITE
1BaSB11_SBONC6	LOC799552	3 prime	13.718 kb	chr6	44260654	1		OPPOSITE
1BaSB11_SBONC6	gata2b	intron 4	within gene	chr6	44375710	1		SAME
1BaSB11_SBONC6	zgc:112163	5 prime	1.690 kb	chr6	44450345		1	OPPOSITE
1BaSB11_SBONC6	tgfa	intron 1	within gene	chr6	44572382	1		OPPOSITE
1BaSB11_SBONC6	sfrs3a	5 prime	10.062 kb	chr6	44672306	1		SAME
1BaSB11_SBONC6	fkbp5	intron 10	within gene	chr6	44689052	1		OPPOSITE
1BaSB11_SBONC6	hemk1	intron 7	within gene	chr6	45162077	5	2	SAME
1BaSB11_SBONC6	hemk1	5 prime	59.904 kb	chr6	45235589	2		OPPOSITE
1BaSB11_SBONC6	rad18	5 prime	135.779 kb	chr6	45392993	1	1	OPPOSITE
1BaSB11_SBONC6	zgc:77817	intron 1	within gene	chr6	46202099		1	SAME
1BaSB11_SBONC6	gpx1b	3 prime	2.100 kb	chr6	46297488	1		SAME
1BaSB11_SBONC6	sema3fa	5 prime	163.644 kb	chr6	46704980	265		SAME
1BaSB11_SBONC6	zgc:113054	3 prime	23.532 kb	chr6	47535079	1		OPPOSITE
1BaSB11_SBONC6	zgc:113054	3 prime	46.703 kb	chr6	47558250	7		SAME
1BaSB11_SBONC6	foxp1b	intron 4	within gene	chr6	47805803		23	OPPOSITE
1BaSB11_SBONC6	gpr27	3 prime	55.812 kb	chr6	48050435	2		SAME
1BaSB11_SBONC6				chr6	48552701		18
1BaSB11_SBONC6				chr6	48591265	6
1BaSB11_SBONC6				chr6	48742975		1
1BaSB11_SBONC6				chr6	48876877	2
1BaSB11_SBONC6	rtk6	exon 4	within gene	chr6	49416836	1		OPPOSITE
1BaSB11_SBONC6	stau1	3 prime	40.916 kb	chr6	50024487	2		SAME
1BaSB11_SBONC6	zgc:66479	5 prime	49.158 kb	chr6	50415137		53	OPPOSITE
1BaSB11_SBONC6	zgc:113358	5 prime	55.361 kb	chr6	50529256		1	SAME
1BaSB11_SBONC6				chr6	50810168	2
1BaSB11_SBONC6				chr6	50834015	14
1BaSB11_SBONC6	rhoae	5 prime	40.137 kb	chr6	51230530		55	OPPOSITE
1BaSB11_SBONC6	rhoae	3 prime	58.895 kb	chr6	51329562	1		SAME
1BaSB11_SBONC6	zgc:56685	3 prime	8.880 kb	chr6	51410753	413	12	OPPOSITE
1BaSB11_SBONC6	capza1a	intron 7	within gene	chr6	52045058	1		OPPOSITE
1BaSB11_SBONC6				chr6	52369775	4
1BaSB11_SBONC6				chr6	52406107	9
1BaSB11_SBONC6	rplp2	3 prime	67.044 kb	chr6	52898635	4		SAME
1BaSB11_SBONC6	rps26l	5 prime	16.491 kb	chr6	53068497	1		SAME
1BaSB11_SBONC6	rab22a	intron 1	within gene	chr6	53082037		34	SAME
1BaSB11_SBONC6	rab22a	3 prime	1.420 kb	chr6	53106426	1		SAME
1BaSB11_SBONC6	vapb	3 prime	3.274 kb	chr6	53168496	1		SAME
1BaSB11_SBONC6	vapb	3 prime	41.668 kb	chr6	53206890	2		OPPOSITE
1BaSB11_SBONC6	ahcy	intron 2	within gene	chr6	53461055	1		SAME
1BaSB11_SBONC6	ahcy	intron 3	within gene	chr6	53465620	2		OPPOSITE
1BaSB11_SBONC6	raly	exon 9	within gene	chr6	53552413	875		SAME
1BaSB11_SBONC6	raly	intron 6	within gene	chr6	53560930	1	2	SAME
1BaSB11_SBONC6	raly	intron 2	within gene	chr6	53586872		1	SAME
1BaSB11_SBONC6	rbl1	5 prime	26.095 kb	chr6	55228040	1		SAME
1BaSB11_SBONC6	ywhab1	5 prime	78.991 kb	chr6	55771941	4		SAME
1BaSB11_SBONC6	eif6	3 prime	22.738 kb	chr6	55953871	1		SAME
1BaSB11_SBONC6	gnb1l	5 prime	29.331 kb	chr6	56971336	317		SAME
1BaSB11_SBONC6	gnb1l	5 prime	29.333 kb	chr6	56971338	1		SAME
1BaSB11_SBONC6	snrpc	3 prime	13.227 kb	chr6	57833853		1	OPPOSITE
1BaSB11_SBONC6	zgc:171784	3 prime	58.384 kb	chr6	58143191		623	OPPOSITE
1BaSB11_SBONC6	kri1l	5 prime	36.603 kb	chr6	59636388	2		SAME
1BaSB11_SBONC6	zgc:153102	intron 3	within gene	chr6	60638396		1	SAME
1BaSB11_SBONC6				chr7	9531	30
1BaSB11_SBONC6	zgc:172065	5 prime	72.596 kb	chr7	416744	167		SAME
1BaSB11_SBONC6				chr7	673535	1
1BaSB11_SBONC6				chr7	676129	1
1BaSB11_SBONC6	nrxn2b	intron 6	within gene	chr7	1353234		1	SAME
1BaSB11_SBONC6	nrxn2b	intron 3	within gene	chr7	1387174	5		OPPOSITE
1BaSB11_SBONC6	zgc:175177	intron 3	within gene	chr7	1538552	1		OPPOSITE
1BaSB11_SBONC6				chr7	2422346	1
1BaSB11_SBONC6	si:dkey-88n24.6	3 prime	3.553 kb	chr7	3061616	1		OPPOSITE
1BaSB11_SBONC6	si:ch73-335d12.2	3 prime	13.716 kb	chr7	3144910		3	SAME
1BaSB11_SBONC6	LOC100003110	3 prime	7.880 kb	chr7	4417002	1		SAME
1BaSB11_SBONC6	LOC558654	intron 3	within gene	chr7	4633248	216		OPPOSITE
1BaSB11_SBONC6				chr7	5830513	7
1BaSB11_SBONC6				chr7	5891029	1
1BaSB11_SBONC6				chr7	5891030	2557
1BaSB11_SBONC6	actn3b	3 prime	132.219 kb	chr7	5998691	1		OPPOSITE
1BaSB11_SBONC6	fzd6	5 prime	93.979 kb	chr7	6025981	1		OPPOSITE
1BaSB11_SBONC6	zgc:136773	3 prime	83.646 kb	chr7	6217282	5		SAME
1BaSB11_SBONC6	pnp5a	5 prime	56.295 kb	chr7	6472342	132		SAME
1BaSB11_SBONC6	pnp5a	5 prime	71.664 kb	chr7	6487711	1		OPPOSITE
1BaSB11_SBONC6	zgc:153347	intron 1	within gene	chr7	7209816	1	4	OPPOSITE
1BaSB11_SBONC6	six7	5 prime	18.571 kb	chr7	7477864	2		SAME
1BaSB11_SBONC6	zgc:101832	5 prime	0.655 kb	chr7	7881050		2	SAME
1BaSB11_SBONC6	zgc:172244	intron 2	within gene	chr7	8539139	1		OPPOSITE
1BaSB11_SBONC6	zgc:174688	5 prime	8.546 kb	chr7	8568068	1		SAME
1BaSB11_SBONC6	zgc:172290	3 prime	10.956 kb	chr7	8682680	2	3	OPPOSITE
1BaSB11_SBONC6	zgc:112234	5 prime	9.737 kb	chr7	9195171	7		OPPOSITE
1BaSB11_SBONC6				chr7	9392101	22
1BaSB11_SBONC6	zgc:158636	5 prime	83.217 kb	chr7	9575509		162	SAME
1BaSB11_SBONC6	zgc:158636	5 prime	47.712 kb	chr7	9611014	6		OPPOSITE
1BaSB11_SBONC6	zgc:55468	3 prime	166.365 kb	chr7	9960799		2	OPPOSITE
1BaSB11_SBONC6	zgc:55468	3 prime	166.263 kb	chr7	9960901		1	OPPOSITE
1BaSB11_SBONC6	arnt2	intron 5	within gene	chr7	10255723		2	OPPOSITE
1BaSB11_SBONC6				chr7	10531718	1
1BaSB11_SBONC6				chr7	10645590	1
1BaSB11_SBONC6	zgc:158350	3 prime	53.228 kb	chr7	10898645	2		OPPOSITE
1BaSB11_SBONC6	zgc:158350	3 prime	46.661 kb	chr7	10905212	1		OPPOSITE
1BaSB11_SBONC6	zgc:158350	5 prime	56.376 kb	chr7	11008249	1		OPPOSITE
1BaSB11_SBONC6				chr7	11228841	1
1BaSB11_SBONC6	zgc:123250	5 prime	51.388 kb	chr7	11294948	173		SAME
1BaSB11_SBONC6	zgc:92303	intron 2	within gene	chr7	11623191	7		SAME
1BaSB11_SBONC6				chr7	11959374		1
1BaSB11_SBONC6	zgc:162892	intron 9	within gene	chr7	12353388	16		SAME
1BaSB11_SBONC6	mespa	3 prime	53.742 kb	chr7	12650718		122	OPPOSITE
1BaSB11_SBONC6	igf1rb	intron 1	within gene	chr7	12715674	3	2	SAME
1BaSB11_SBONC6	igf1rb	intron 17	within gene	chr7	12848299	5		SAME
1BaSB11_SBONC6	nitr1f	3 prime	99.084 kb	chr7	13101261	1		OPPOSITE
1BaSB11_SBONC6	rlbp1a	exon 7	within gene	chr7	13785068	1		OPPOSITE
1BaSB11_SBONC6	kif7	3 prime	84.392 kb	chr7	14419838		59	SAME
1BaSB11_SBONC6	kif7	3 prime	72.698 kb	chr7	14431532		1	OPPOSITE
1BaSB11_SBONC6	pax6b	5 prime	97.290 kb	chr7	15060121		2	SAME
1BaSB11_SBONC6	btr06	intron 2	within gene	chr7	15471138	2		OPPOSITE
1BaSB11_SBONC6	btr06	5 prime	52.406 kb	chr7	15527045	1		SAME
1BaSB11_SBONC6				chr7	16147903	1
1BaSB11_SBONC6				chr7	16178684	2
1BaSB11_SBONC6				chr7	17398601	2
1BaSB11_SBONC6				chr7	17695867		3
1BaSB11_SBONC6				chr7	17860151	1
1BaSB11_SBONC6				chr7	17883378	1
1BaSB11_SBONC6	dtx1	3 prime	122.315 kb	chr7	17946491		1	SAME
1BaSB11_SBONC6	mllt3	5 prime	9.549 kb	chr7	18543385	1		OPPOSITE
1BaSB11_SBONC6	zgc:194655	5 prime	39.241 kb	chr7	19248769	2		SAME
1BaSB11_SBONC6	zgc:194655	5 prime	49.651 kb	chr7	19259179	5		SAME
1BaSB11_SBONC6	efnb3b	intron 2	within gene	chr7	20768777	2235		OPPOSITE
1BaSB11_SBONC6	zgc:113025	5 prime	125.212 kb	chr7	20993618	1		OPPOSITE
1BaSB11_SBONC6	zgc:113025	3 prime	46.379 kb	chr7	21165209	1		SAME
1BaSB11_SBONC6				chr7	21490082	1
1BaSB11_SBONC6	fgf11a	intron 1	within gene	chr7	22307526	8		OPPOSITE
1BaSB11_SBONC6	fgf11a	3 prime	32.404 kb	chr7	22425886	1		OPPOSITE
1BaSB11_SBONC6	zgc:56141	5 prime	12.321 kb	chr7	22684460		1	SAME
1BaSB11_SBONC6	zgc:153369	3 prime	90.817 kb	chr7	22996660		3	SAME
1BaSB11_SBONC6	zgc:153369	3 prime	90.819 kb	chr7	22996662		1	SAME
1BaSB11_SBONC6				chr7	23142517		2
1BaSB11_SBONC6	mir730	5 prime	55.904 kb	chr7	23356813	3		OPPOSITE
1BaSB11_SBONC6	mir730	3 prime	18.752 kb	chr7	23431469	3		OPPOSITE
1BaSB11_SBONC6	mir730	3 prime	18.753 kb	chr7	23431470	1		OPPOSITE
1BaSB11_SBONC6	zgc:109889	3 prime	26.759 kb	chr7	23610909	1011		SAME
1BaSB11_SBONC6	poln	intron 14	within gene	chr7	24468817		1	SAME
1BaSB11_SBONC6	krcp	exon 4	within gene	chr7	24948377	2		OPPOSITE
1BaSB11_SBONC6	krcp	exon 4	within gene	chr7	24948378	1		OPPOSITE
1BaSB11_SBONC6	krcp	exon 4	within gene	chr7	24948379	1		OPPOSITE
1BaSB11_SBONC6	cyp26b1	3 prime	78.136 kb	chr7	25495825	369		OPPOSITE
1BaSB11_SBONC6	hmgb3a	exon 3	within gene	chr7	25969602	583		OPPOSITE
1BaSB11_SBONC6	ap1s1	3 prime	20.734 kb	chr7	26296470		41	OPPOSITE
1BaSB11_SBONC6	serpine1	5 prime	7.495 kb	chr7	26331572		1	SAME
1BaSB11_SBONC6	tnk2	intron 1	within gene	chr7	26605409	2		OPPOSITE
1BaSB11_SBONC6	tnk2	3 prime	16.198 kb	chr7	26637052	73		OPPOSITE
1BaSB11_SBONC6	zgc:77051	intron 8	within gene	chr7	26639773	10	2	OPPOSITE
1BaSB11_SBONC6	zgc:73292	3 prime	14.460 kb	chr7	26808651	2		SAME
1BaSB11_SBONC6	rps13	3 prime	41.093 kb	chr7	27165929		5	OPPOSITE
1BaSB11_SBONC6	rras2	intron 1	within gene	chr7	27961921	792		OPPOSITE
1BaSB11_SBONC6	lmo1	5 prime	54.076 kb	chr7	28440367	6		OPPOSITE
1BaSB11_SBONC6	stk33	intron 2	within gene	chr7	28637075	9		SAME
1BaSB11_SBONC6	stk33	intron 2	within gene	chr7	28643788	389		SAME
1BaSB11_SBONC6	scube2	intron 8	within gene	chr7	28839275	1		SAME
1BaSB11_SBONC6	zgc:77294	3 prime	42.157 kb	chr7	29123711	2		SAME
1BaSB11_SBONC6	lrrc50	5 prime	53.326 kb	chr7	29210136	2	1	OPPOSITE
1BaSB11_SBONC6	lrrc50	5 prime	9.907 kb	chr7	29253555	1		OPPOSITE
1BaSB11_SBONC6	vrk3	intron 1	within gene	chr7	29313581	1		OPPOSITE
1BaSB11_SBONC6	ogfod1	exon 8	within gene	chr7	29350193	1		OPPOSITE
1BaSB11_SBONC6	tmed3	3 prime	26.317 kb	chr7	30448124		4	SAME
1BaSB11_SBONC6	adam10a	intron 7	within gene	chr7	30723616	263		OPPOSITE
1BaSB11_SBONC6	mcee	3 prime	98.243 kb	chr7	31060472	1		SAME
1BaSB11_SBONC6	zgc:111992	5 prime	50.314 kb	chr7	31289283	1		OPPOSITE
1BaSB11_SBONC6	zgc:111992	5 prime	93.247 kb	chr7	31332216	4		OPPOSITE
1BaSB11_SBONC6	bdnf	5 prime	17.937 kb	chr7	32263567	1		SAME
1BaSB11_SBONC6	bdnf	5 prime	33.703 kb	chr7	32279333	1		OPPOSITE
1BaSB11_SBONC6				chr7	32761869	48
1BaSB11_SBONC6	fshb	5 prime	52.820 kb	chr7	32881801	80		SAME
1BaSB11_SBONC6	zgc:153243	intron 2	within gene	chr7	32951084	1		OPPOSITE
1BaSB11_SBONC6	zgc:153225	3 prime	43.066 kb	chr7	33269810		2	SAME
1BaSB11_SBONC6	LOC565419	3 prime	10.342 kb	chr7	33424836	3		OPPOSITE
1BaSB11_SBONC6				chr7	34143060	1
1BaSB11_SBONC6	zgc:194563	3 prime	40.986 kb	chr7	34257472	1	1	SAME
1BaSB11_SBONC6	zgc:172137	exon 20	within gene	chr7	34334315		1	OPPOSITE
1BaSB11_SBONC6	zgc:136220	5 prime	1.726 kb	chr7	34567642	1		SAME
1BaSB11_SBONC6	nr1h3	3 prime	50.524 kb	chr7	34728205	1		OPPOSITE
1BaSB11_SBONC6	esrp2	3 prime	2.038 kb	chr7	35163523	4		OPPOSITE
1BaSB11_SBONC6	zgc:153386	3 prime	36.604 kb	chr7	35343904		4	SAME
1BaSB11_SBONC6	mmp2	5 prime	17.667 kb	chr7	35796134	1		SAME
1BaSB11_SBONC6	irx5a	5 prime	59.848 kb	chr7	36115761		3	OPPOSITE
1BaSB11_SBONC6	irx3a	3 prime	77.908 kb	chr7	36472841	1		SAME
1BaSB11_SBONC6				chr7	36699431	4
1BaSB11_SBONC6				chr7	37634791	3
1BaSB11_SBONC6				chr7	37683961	2
1BaSB11_SBONC6	sall1a	5 prime	59.732 kb	chr7	37738641	593		SAME
1BaSB11_SBONC6	sall1a	3 prime	37.489 kb	chr7	37835862		1	OPPOSITE
1BaSB11_SBONC6	nkd1	intron 3	within gene	chr7	38008122	2		OPPOSITE
1BaSB11_SBONC6	brd7	5 prime	16.353 kb	chr7	38146715	1		OPPOSITE
1BaSB11_SBONC6	harbi1	3 prime	29.869 kb	chr7	39248204	1		SAME
1BaSB11_SBONC6	tnni2b.2	5 prime	55.520 kb	chr7	39668514	3		SAME
1BaSB11_SBONC6	tnni2b.2	5 prime	28.443 kb	chr7	39695591		2	OPPOSITE
1BaSB11_SBONC6	zgc:158564	5 prime	31.423 kb	chr7	39975110		1	SAME
1BaSB11_SBONC6	tada2b	3 prime	1.629 kb	chr7	40074528	229		OPPOSITE
1BaSB11_SBONC6	tada2b	3 prime	1.631 kb	chr7	40074530	1		OPPOSITE
1BaSB11_SBONC6	ncapg2	3 prime	2.067 kb	chr7	40732617	1		SAME
1BaSB11_SBONC6				chr7	40856079	1
1BaSB11_SBONC6	rnf32	5 prime	44.952 kb	chr7	41287392	1116		SAME
1BaSB11_SBONC6	rnf32	5 prime	44.954 kb	chr7	41287394	1		SAME
1BaSB11_SBONC6	shcbp1	3 prime	31.715 kb	chr7	41307634		115	SAME
1BaSB11_SBONC6	shcbp1	3 prime	29.965 kb	chr7	41309384		1	OPPOSITE
1BaSB11_SBONC6	shcbp1	intron 8	within gene	chr7	41329068	1		SAME
1BaSB11_SBONC6	shcbp1	5 prime	23.671 kb	chr7	41363020		1	SAME
1BaSB11_SBONC6	shcbp1	5 prime	36.230 kb	chr7	41375579	1		SAME
1BaSB11_SBONC6	shcbp1	5 prime	81.680 kb	chr7	41421029	2		SAME
1BaSB11_SBONC6				chr7	42065964	191
1BaSB11_SBONC6				chr7	42373969		3
1BaSB11_SBONC6				chr7	42375162		6
1BaSB11_SBONC6				chr7	42595389		1
1BaSB11_SBONC6				chr7	42625581		118
1BaSB11_SBONC6	zplxdc2	3 prime	33.619 kb	chr7	43634979	1		SAME
1BaSB11_SBONC6	zplxdc2	3 prime	33.621 kb	chr7	43634981	774		SAME
1BaSB11_SBONC6	smarcd3b	intron 2	within gene	chr7	43666957	1		SAME
1BaSB11_SBONC6	htr5al	3 prime	16.133 kb	chr7	44054864		1	OPPOSITE
1BaSB11_SBONC6				chr7	45114656		365
1BaSB11_SBONC6	zgc:194678	5 prime	49.592 kb	chr7	45251021		503	SAME
1BaSB11_SBONC6	dync1li2	intron 4	within gene	chr7	45675273	1		SAME
1BaSB11_SBONC6				chr7	46361711		2
1BaSB11_SBONC6	ccne	3 prime	49.303 kb	chr7	46695851	515		OPPOSITE
1BaSB11_SBONC6				chr7	46972303	1
1BaSB11_SBONC6				chr7	47140174	1	1
1BaSB11_SBONC6				chr7	47641139		1
1BaSB11_SBONC6				chr7	48269538	2
1BaSB11_SBONC6				chr7	48677676	2
1BaSB11_SBONC6	zorba	3 prime	108.351 kb	chr7	48786111	5	3	SAME
1BaSB11_SBONC6	zorba	intron 4	within gene	chr7	48891564	1		SAME
1BaSB11_SBONC6	crabp1b	3 prime	10.901 kb	chr7	48996895		204	SAME
1BaSB11_SBONC6	crabp1b	3 prime	10.903 kb	chr7	48996897		1	SAME
1BaSB11_SBONC6	lingo1b	intron 1	within gene	chr7	49123142	2		SAME
1BaSB11_SBONC6	cdkn1c	5 prime	3.136 kb	chr7	49311537	3		SAME
1BaSB11_SBONC6	igf2a	3 prime	45.223 kb	chr7	49564949		2	OPPOSITE
1BaSB11_SBONC6				chr7	49621048	338
1BaSB11_SBONC6				chr7	49683521		1
1BaSB11_SBONC6				chr7	49730391	1
1BaSB11_SBONC6				chr7	49871939	2
1BaSB11_SBONC6				chr7	49871940	1
1BaSB11_SBONC6	vps33b	intron 22	within gene	chr7	51026090		1	SAME
1BaSB11_SBONC6	zgc:171549	5 prime	23.131 kb	chr7	51081396	3		OPPOSITE
1BaSB11_SBONC6	zgc:194993	intron 5	within gene	chr7	51695873	1		SAME
1BaSB11_SBONC6	katnb1	intron 17	within gene	chr7	53098686	1		SAME
1BaSB11_SBONC6	zgc:152651	5 prime	30.411 kb	chr7	53730947	70		SAME
1BaSB11_SBONC6				chr7	53987209		1
1BaSB11_SBONC6				chr7	54182764	1
1BaSB11_SBONC6				chr7	54554218	2
1BaSB11_SBONC6	fgf4	3 prime	5.843 kb	chr7	55439440		1	OPPOSITE
1BaSB11_SBONC6	LOC407698	exon 24	within gene	chr7	55873400	307	1	OPPOSITE
1BaSB11_SBONC6	neo1	intron 7	within gene	chr7	56189828	1		SAME
1BaSB11_SBONC6	neo1	intron 2	within gene	chr7	56265023	1		OPPOSITE
1BaSB11_SBONC6	si:dkey-173l11.4	intron 12	within gene	chr7	56830154		1	SAME
1BaSB11_SBONC6	si:dkey-173l11.4	intron 12	within gene	chr7	56845369	3		SAME
1BaSB11_SBONC6	si:dkey-173l11.4	intron 12	within gene	chr7	56873286	2		OPPOSITE
1BaSB11_SBONC6	cdh1	intron 3	within gene	chr7	57240980	3		SAME
1BaSB11_SBONC6	cdh1	intron 3	within gene	chr7	57307182	1		OPPOSITE
1BaSB11_SBONC6	cdh1	3 prime	34.684 kb	chr7	57377852		1	SAME
1BaSB11_SBONC6	cdh1	3 prime	36.800 kb	chr7	57379968		3	SAME
1BaSB11_SBONC6	cdh1	3 prime	42.254 kb	chr7	57385422	1		SAME
1BaSB11_SBONC6	cdh1	3 prime	49.898 kb	chr7	57393066	1		SAME
1BaSB11_SBONC6	cdh1	3 prime	56.023 kb	chr7	57399191	35		SAME
1BaSB11_SBONC6	cdh1	3 prime	56.115 kb	chr7	57399283	3		SAME
1BaSB11_SBONC6	cdh1	3 prime	60.599 kb	chr7	57403767	1		SAME
1BaSB11_SBONC6	cdh1	3 prime	65.452 kb	chr7	57408620	2		OPPOSITE
1BaSB11_SBONC6	cdh1	3 prime	68.581 kb	chr7	57411749	1		SAME
1BaSB11_SBONC6	cdh1	3 prime	81.536 kb	chr7	57424704	1		OPPOSITE
1BaSB11_SBONC6	cdh1	3 prime	88.994 kb	chr7	57432162	2	6	OPPOSITE
1BaSB11_SBONC6	cdh1	3 prime	91.208 kb	chr7	57434376		2	OPPOSITE
1BaSB11_SBONC6	cdh1	3 prime	96.173 kb	chr7	57439341	1		OPPOSITE
1BaSB11_SBONC6	snai3	5 prime	78.248 kb	chr7	57484817	2		SAME
1BaSB11_SBONC6	snai3	5 prime	51.545 kb	chr7	57511520	1	1	OPPOSITE
1BaSB11_SBONC6	snai3	5 prime	51.307 kb	chr7	57511758	1		OPPOSITE
1BaSB11_SBONC6	snai3	5 prime	50.713 kb	chr7	57512352	14	1	SAME
1BaSB11_SBONC6	snai3	5 prime	50.273 kb	chr7	57512792	1		SAME
1BaSB11_SBONC6	snai3	5 prime	49.096 kb	chr7	57513969	1		OPPOSITE
1BaSB11_SBONC6	snai3	5 prime	32.023 kb	chr7	57531042	19		OPPOSITE
1BaSB11_SBONC6	ctu2	3 prime	95.770 kb	chr7	57947349	5		SAME
1BaSB11_SBONC6				chr7	58380954		323
1BaSB11_SBONC6	zgc:153043	5 prime	63.069 kb	chr7	59416870	1		SAME
1BaSB11_SBONC6	zgc:153148	3 prime	48.509 kb	chr7	59700309	4	1001	OPPOSITE
1BaSB11_SBONC6	drd4b	5 prime	65.509 kb	chr7	59927734	1		OPPOSITE
1BaSB11_SBONC6	camk2d1	3 prime	16.813 kb	chr7	60419693		1	OPPOSITE
1BaSB11_SBONC6	zgc:111982	3 prime	35.188 kb	chr7	60658342	1		SAME
1BaSB11_SBONC6	si:dkey-235k4.1	3 prime	31.662 kb	chr7	60751724	2		OPPOSITE
1BaSB11_SBONC6	si:dkey-235k4.1	5 prime	16.814 kb	chr7	60800200	2		OPPOSITE
1BaSB11_SBONC6	si:dkey-235k4.1	5 prime	24.844 kb	chr7	60808230	6	1	OPPOSITE
1BaSB11_SBONC6				chr7	62021219		1
1BaSB11_SBONC6				chr7	62154578		1
1BaSB11_SBONC6				chr7	62158709	30
1BaSB11_SBONC6				chr7	62321390	1
1BaSB11_SBONC6				chr7	62414877	1
1BaSB11_SBONC6				chr7	62441219	1605
1BaSB11_SBONC6				chr7	63405998	4	1
1BaSB11_SBONC6	cwc25	3 prime	99.779 kb	chr7	63560045	2		OPPOSITE
1BaSB11_SBONC6				chr7	63919400	3899	1
1BaSB11_SBONC6				chr7	64146413	1
1BaSB11_SBONC6	haus6	3 prime	23.104 kb	chr7	65465637		546	SAME
1BaSB11_SBONC6	lypla1	3 prime	88.153 kb	chr7	65671870		1	SAME
1BaSB11_SBONC6	agxt2l1	5 prime	100.924 kb	chr7	66338138	30		OPPOSITE
1BaSB11_SBONC6	zgc:194930	5 prime	59.200 kb	chr7	67673216	1		SAME
1BaSB11_SBONC6	vapb	3 prime	34.199 kb	chr7	68187117	3		SAME
1BaSB11_SBONC6	nadsyn1	3 prime	34.345 kb	chr7	68840236	1		SAME
1BaSB11_SBONC6				chr7	68946255	18
1BaSB11_SBONC6				chr7	68978321	4
1BaSB11_SBONC6	pth2	5 prime	41.095 kb	chr7	69763645	1		OPPOSITE
1BaSB11_SBONC6				chr7	69885443	61
1BaSB11_SBONC6				chr7	70051702	1
1BaSB11_SBONC6	eif4g2a	5 prime	87.726 kb	chr7	70353611		1	SAME
1BaSB11_SBONC6	ctr9	5 prime	6.181 kb	chr7	70487198		648	SAME
1BaSB11_SBONC6	zgc:63599	5 prime	2.530 kb	chr7	71016814		4	SAME
1BaSB11_SBONC6				chr7	71283543		2
1BaSB11_SBONC6	hnf4b	intron 1	within gene	chr7	71413129	1		OPPOSITE
1BaSB11_SBONC6	zgc:64105	intron 9	within gene	chr7	71526723		1	SAME
1BaSB11_SBONC6	rpl13	3 prime	75.004 kb	chr7	71738984	1		SAME
1BaSB11_SBONC6	zgc:66450	5 prime	29.569 kb	chr7	72958954	2		OPPOSITE
1BaSB11_SBONC6				chr7	73142417		1
1BaSB11_SBONC6				chr7	73508195		1
1BaSB11_SBONC6				chr7	73977578	1
1BaSB11_SBONC6				chr7	74739506		6
1BaSB11_SBONC6	zgc:162126	intron 2	within gene	chr7	75232483	1		SAME
1BaSB11_SBONC6	adcyap1a	3 prime	51.327 kb	chr7	75328973		17	SAME
1BaSB11_SBONC6	dhx15	intron 5	within gene	chr7	75636958	3	1	OPPOSITE
1BaSB11_SBONC6				chr7	75885696	1
1BaSB11_SBONC6				chr7	76006399	611
1BaSB11_SBONC6	btr12	5 prime	54.460 kb	chr7	76498707	2		SAME
1BaSB11_SBONC6	zgc:171537	5 prime	16.594 kb	chr7	76677481	1839		OPPOSITE
1BaSB11_SBONC6	sema6a	intron 1	within gene	chr8	613795	1		OPPOSITE
1BaSB11_SBONC6	zgc:56036	exon 9	within gene	chr8	2668500		65	OPPOSITE
1BaSB11_SBONC6	LOC562755	3 prime	73.272 kb	chr8	2880493	1		SAME
1BaSB11_SBONC6				chr8	3877196		1
1BaSB11_SBONC6				chr8	4086278		11
1BaSB11_SBONC6				chr8	4254631	1
1BaSB11_SBONC6	myl2	5 prime	99.867 kb	chr8	4313190	2		OPPOSITE
1BaSB11_SBONC6	pptc7	3 prime	13.066 kb	chr8	4465415	8		OPPOSITE
1BaSB11_SBONC6	es1	3 prime	52.722 kb	chr8	4825694	4		SAME
1BaSB11_SBONC6	es1	3 prime	20.698 kb	chr8	4857718	1		SAME
1BaSB11_SBONC6	zgc:63587	intron 8	within gene	chr8	5096355	2	1	SAME
1BaSB11_SBONC6				chr8	5207638		1
1BaSB11_SBONC6				chr8	5214796	14
1BaSB11_SBONC6	zgc:103700	3 prime	4.456 kb	chr8	5714524	1		SAME
1BaSB11_SBONC6	zgc:103599	5 prime	23.596 kb	chr8	5747337	521		SAME
1BaSB11_SBONC6				chr8	5868313	526
1BaSB11_SBONC6	dock5	intron 26	within gene	chr8	6557686	1		SAME
1BaSB11_SBONC6	nefl	5 prime	4.115 kb	chr8	6746088	2		OPPOSITE
1BaSB11_SBONC6	gpd1a	3 prime	22.673 kb	chr8	6939757	1		OPPOSITE
1BaSB11_SBONC6	LOC556480	intron 3	within gene	chr8	7120238		1	SAME
1BaSB11_SBONC6	cenpa	5 prime	30.719 kb	chr8	7225434	1	2	SAME
1BaSB11_SBONC6	tfe3a	intron 5	within gene	chr8	7597764	1		SAME
1BaSB11_SBONC6	cxxc1l	3 prime	8.842 kb	chr8	7679375		1	OPPOSITE
1BaSB11_SBONC6	zgc:172102	5 prime	84.316 kb	chr8	7764093	451		SAME
1BaSB11_SBONC6	LOC568484	3 prime	22.634 kb	chr8	8417830		6	OPPOSITE
1BaSB11_SBONC6	zgc:86609	intron 6	within gene	chr8	8464469	1		SAME
1BaSB11_SBONC6	zgc:101894	3 prime	93.005 kb	chr8	8568632	3		OPPOSITE
1BaSB11_SBONC6	zgc:101894	3 prime	93.007 kb	chr8	8568634	1		OPPOSITE
1BaSB11_SBONC6	otud5a	intron 1	within gene	chr8	8638627	27		OPPOSITE
1BaSB11_SBONC6	otud5a	intron 1	within gene	chr8	8638631	934		OPPOSITE
1BaSB11_SBONC6	plxna3	intron 31	within gene	chr8	8995486	1		OPPOSITE
1BaSB11_SBONC6	plxna3	intron 23	within gene	chr8	9025019	1		OPPOSITE
1BaSB11_SBONC6	plxna3	intron 10	within gene	chr8	9071244		8	OPPOSITE
1BaSB11_SBONC6	plxna3	intron 3	within gene	chr8	9231100	50		OPPOSITE
1BaSB11_SBONC6	plxna3	intron 3	within gene	chr8	9288932		2	OPPOSITE
1BaSB11_SBONC6	plxna3	intron 3	within gene	chr8	9288946	2		OPPOSITE
1BaSB11_SBONC6	zgc:113105	intron 15	within gene	chr8	9415097	1		OPPOSITE
1BaSB11_SBONC6	zgc:113105	intron 9	within gene	chr8	9438841	20		OPPOSITE
1BaSB11_SBONC6				chr8	9889697	1
1BaSB11_SBONC6				chr8	9891426	1
1BaSB11_SBONC6	zgc:153997	5 prime	89.948 kb	chr8	9971329		1	SAME
1BaSB11_SBONC6	zgc:153997	3 prime	53.971 kb	chr8	10115248		1	OPPOSITE
1BaSB11_SBONC6				chr8	10163272		498
1BaSB11_SBONC6				chr8	10379117	4
1BaSB11_SBONC6				chr8	10452048	1
1BaSB11_SBONC6				chr8	10481522	3
1BaSB11_SBONC6	nras	intron 1	within gene	chr8	10913315	1154		SAME
1BaSB11_SBONC6	unc45b	5 prime	2.448 kb	chr8	11006923	1		SAME
1BaSB11_SBONC6	mir126	5 prime	3.959 kb	chr8	11389660	294		SAME
1BaSB11_SBONC6	si:dkeyp-51b7.1	3 prime	136.067 kb	chr8	12104192	3		OPPOSITE
1BaSB11_SBONC6	si:dkeyp-51b7.1	intron 14	within gene	chr8	12186265	1		OPPOSITE
1BaSB11_SBONC6	si:dkeyp-51b7.1	intron 14	within gene	chr8	12186267	1		OPPOSITE
1BaSB11_SBONC6	traf1	5 prime	12.053 kb	chr8	12281920	1		OPPOSITE
1BaSB11_SBONC6	zgc:153628	intron 7	within gene	chr8	12945178	1		SAME
1BaSB11_SBONC6	ccdc124	intron 2	within gene	chr8	13418284		2	SAME
1BaSB11_SBONC6	zgc:171538	exon 3	within gene	chr8	13682529		144	SAME
1BaSB11_SBONC6	zgc:171538	5 prime	1.521 kb	chr8	13693849	1		SAME
1BaSB11_SBONC6	zgc:171538	5 prime	34.391 kb	chr8	13726719		1	SAME
1BaSB11_SBONC6	si:dkey-6n6.1	intron 6	within gene	chr8	14299660	3		SAME
1BaSB11_SBONC6	zgc:63721	intron 9	within gene	chr8	14352223		1	OPPOSITE
1BaSB11_SBONC6	sin3b	5 prime	48.292 kb	chr8	14450640		5	SAME
1BaSB11_SBONC6				chr8	15645733	3
1BaSB11_SBONC6				chr8	15680637	1	1
1BaSB11_SBONC6	elavl4	3 prime	42.594 kb	chr8	16343742	1		OPPOSITE
1BaSB11_SBONC6	rab3c	3 prime	73.567 kb	chr8	17316351		2	SAME
1BaSB11_SBONC6	prkcz	intron 4	within gene	chr8	18029566	492		OPPOSITE
1BaSB11_SBONC6	zgc:158613	5 prime	32.662 kb	chr8	18237156	1		SAME
1BaSB11_SBONC6	zgc:158613	5 prime	32.660 kb	chr8	18237158	791		SAME
1BaSB11_SBONC6	si:ch211-232d19.4	intron 3	within gene	chr8	18932491		13	OPPOSITE
1BaSB11_SBONC6	stap2b	5 prime	1.270 kb	chr8	18982042	1		SAME
1BaSB11_SBONC6	zgc:77486	3 prime	27.791 kb	chr8	19560075	7		SAME
1BaSB11_SBONC6	zgc:77486	5 prime	6.763 kb	chr8	19594629	9		SAME
1BaSB11_SBONC6	npl	5 prime	0.525 kb	chr8	19688735		1	SAME
1BaSB11_SBONC6	notch2	intron 15	within gene	chr8	19964331		1	OPPOSITE
1BaSB11_SBONC6	foxd1	3 prime	40.799 kb	chr8	20082763	8		SAME
1BaSB11_SBONC6	rfx2	intron 2	within gene	chr8	20472514	4		SAME
1BaSB11_SBONC6	rfx2	5 prime	5.946 kb	chr8	20509895	1		OPPOSITE
1BaSB11_SBONC6	si:dkey-45m5.4	intron 14	within gene	chr8	20704221	1		SAME
1BaSB11_SBONC6	si:dkey-24f17.5	3 prime	88.726 kb	chr8	21863932	1		OPPOSITE
1BaSB11_SBONC6				chr8	22105259		1
1BaSB11_SBONC6				chr8	22151189	163
1BaSB11_SBONC6	si:dkey-202c5.1	intron 2	within gene	chr8	22630244	1		SAME
1BaSB11_SBONC6				chr8	23594367	1
1BaSB11_SBONC6	sypa	5 prime	108.603 kb	chr8	23605418		1	OPPOSITE
1BaSB11_SBONC6	zgc:172155	intron 2	within gene	chr8	23753662	1		OPPOSITE
1BaSB11_SBONC6	ppdpfa	3 prime	52.692 kb	chr8	24035489		7	OPPOSITE
1BaSB11_SBONC6	ppdpfa	3 prime	80.263 kb	chr8	24063060	1		OPPOSITE
1BaSB11_SBONC6	dnmt7	5 prime	75.490 kb	chr8	24072472	1	2	SAME
1BaSB11_SBONC6	si:ch211-163l21.7	5 prime	13.405 kb	chr8	24563803	1		SAME
1BaSB11_SBONC6	srpk1	intron 14	within gene	chr8	24640210	1		SAME
1BaSB11_SBONC6	zgc:158390	3 prime	18.812 kb	chr8	25565967		2	SAME
1BaSB11_SBONC6	ahcyl1	intron 13	within gene	chr8	25745894	90		SAME
1BaSB11_SBONC6	ahcyl1	intron 1	within gene	chr8	25765728	48		SAME
1BaSB11_SBONC6	atxn7l2b	3 prime	37.075 kb	chr8	25911517	1		SAME
1BaSB11_SBONC6	gnat2	5 prime	2.811 kb	chr8	26006174		1	SAME
1BaSB11_SBONC6	zgc:55572	3 prime	18.782 kb	chr8	26354514	24		SAME
1BaSB11_SBONC6	rhoab	exon 5	within gene	chr8	26673746	14		SAME
1BaSB11_SBONC6	sema3bl	intron 10	within gene	chr8	27334521		1	SAME
1BaSB11_SBONC6	sema3bl	intron 10	within gene	chr8	27334523		1	SAME
1BaSB11_SBONC6	kaza	intron 1	within gene	chr8	27541439	70		SAME
1BaSB11_SBONC6	slc16a1	intron 1	within gene	chr8	27728098	290		SAME
1BaSB11_SBONC6				chr8	27878350		2
1BaSB11_SBONC6				chr8	27940209	8
1BaSB11_SBONC6				chr8	28012068	1
1BaSB11_SBONC6				chr8	28020697	3
1BaSB11_SBONC6	LOC100003386	3 prime	88.531 kb	chr8	28109604		3	SAME
1BaSB11_SBONC6	LOC100003386	3 prime	82.935 kb	chr8	28115200	6		OPPOSITE
1BaSB11_SBONC6	LOC100003386	3 prime	62.936 kb	chr8	28135199	14		OPPOSITE
1BaSB11_SBONC6	LOC100003386	5 prime	58.518 kb	chr8	28256653		1	OPPOSITE
1BaSB11_SBONC6	cttnbp2nl	5 prime	84.748 kb	chr8	28710971	1		OPPOSITE
1BaSB11_SBONC6	kcnd3	intron 3	within gene	chr8	28969492		1	OPPOSITE
1BaSB11_SBONC6	klhl12	5 prime	1.312 kb	chr8	29155758	1		OPPOSITE
1BaSB11_SBONC6	grid2	5 prime	711.642 kb	chr8	29599544	1		SAME
1BaSB11_SBONC6	grid2	intron 2	within gene	chr8	29750777	2		SAME
1BaSB11_SBONC6	grid2	intron 2	within gene	chr8	29750779	1404		SAME
1BaSB11_SBONC6	grid2	intron 2	within gene	chr8	29879991		784	OPPOSITE
1BaSB11_SBONC6	grid2	intron 9	within gene	chr8	30118978		1	SAME
1BaSB11_SBONC6				chr8	30741885	5
1BaSB11_SBONC6	cbwd	intron 14	within gene	chr8	31177760		1	SAME
1BaSB11_SBONC6	LOC799483	intron 1	within gene	chr8	31706367		1	SAME
1BaSB11_SBONC6	gadd45g	3 prime	74.563 kb	chr8	32022098		2	OPPOSITE
1BaSB11_SBONC6	ghra	5 prime	24.301 kb	chr8	32386815	3		SAME
1BaSB11_SBONC6	rgs7bpa	3 prime	20.908 kb	chr8	32654821	1		SAME
1BaSB11_SBONC6	htr1aa	5 prime	9.150 kb	chr8	32690390		1	OPPOSITE
1BaSB11_SBONC6	mthfd2l	intron 5	within gene	chr8	33150769	1		OPPOSITE
1BaSB11_SBONC6	ncs1b	intron 1	within gene	chr8	33285139	1		OPPOSITE
1BaSB11_SBONC6	ncs1b	3 prime	62.025 kb	chr8	33418014	1		SAME
1BaSB11_SBONC6	zgc:194839	5 prime	8.672 kb	chr8	33570021	3		SAME
1BaSB11_SBONC6	LOC100004439	5 prime	0.470 kb	chr8	33911282		2	OPPOSITE
1BaSB11_SBONC6	lmx1b.1	intron 3	within gene	chr8	34048612		2	OPPOSITE
1BaSB11_SBONC6	fam125bb	intron 9	within gene	chr8	34178221	1		OPPOSITE
1BaSB11_SBONC6	fam125bb	intron 2	within gene	chr8	34302673	1	2	SAME
1BaSB11_SBONC6	zgc:123248	5 prime	42.320 kb	chr8	35350156	3	14	SAME
1BaSB11_SBONC6	pcsk5b	3 prime	153.869 kb	chr8	35434732	1		OPPOSITE
1BaSB11_SBONC6	zgc:63767	5 prime	26.756 kb	chr8	35660624	1		SAME
1BaSB11_SBONC6	zgc:63767	5 prime	93.210 kb	chr8	36013865	4		SAME
1BaSB11_SBONC6				chr8	36062411	4
1BaSB11_SBONC6				chr8	36338627		4
1BaSB11_SBONC6				chr8	36643218	1
1BaSB11_SBONC6				chr8	36687219	1
1BaSB11_SBONC6	hpd	3 prime	39.467 kb	chr8	37347398	1		SAME
1BaSB11_SBONC6	zgc:77614	intron 4	within gene	chr8	37391390	5		SAME
1BaSB11_SBONC6	zgc:77614	5 prime	4.110 kb	chr8	37609617		1	OPPOSITE
1BaSB11_SBONC6	zgc:77614	3 prime	57.135 kb	chr8	37854496		3	SAME
1BaSB11_SBONC6				chr8	37915342	1
1BaSB11_SBONC6	si:busm1-160c18.6	3 prime	95.512 kb	chr8	38191511	1		OPPOSITE
1BaSB11_SBONC6	rh50	5 prime	7.947 kb	chr8	39228552	4		SAME
1BaSB11_SBONC6	or135-1	5 prime	21.131 kb	chr8	39464642	1		SAME
1BaSB11_SBONC6	adrb3a	intron 1	within gene	chr8	39677268		1	OPPOSITE
1BaSB11_SBONC6	adrb3a	3 prime	7.070 kb	chr8	39701991	1		SAME
1BaSB11_SBONC6				chr8	40036482	1
1BaSB11_SBONC6	si:ch211-170d8.5	3 prime	12.537 kb	chr8	40342885		1	SAME
1BaSB11_SBONC6	si:ch211-170d8.5	3 prime	12.536 kb	chr8	40342886		255	SAME
1BaSB11_SBONC6	ggt5	intron 6	within gene	chr8	40634809	1		SAME
1BaSB11_SBONC6	ggt5	exon 7	within gene	chr8	40636827	6		SAME
1BaSB11_SBONC6	zgc:85787	intron 4	within gene	chr8	40737709		17	OPPOSITE
1BaSB11_SBONC6	zgc:85787	intron 4	within gene	chr8	40768141	2	1	SAME
1BaSB11_SBONC6	zgc:85787	intron 4	within gene	chr8	40776988		156	OPPOSITE
1BaSB11_SBONC6	zgc:85787	intron 4	within gene	chr8	40791817		6	SAME
1BaSB11_SBONC6	zgc:85787	intron 1	within gene	chr8	41438777	161		OPPOSITE
1BaSB11_SBONC6	zgc:85787	5 prime	63.434 kb	chr8	41550641	654		OPPOSITE
1BaSB11_SBONC6				chr8	41603187	2	1
1BaSB11_SBONC6	zgc:162485	5 prime	187.751 kb	chr8	41717827	1		SAME
1BaSB11_SBONC6	gpr133	5 prime	91.281 kb	chr8	42735956	253		OPPOSITE
1BaSB11_SBONC6	piwil1	5 prime	10.397 kb	chr8	43203430	27		OPPOSITE
1BaSB11_SBONC6	fam101a	3 prime	78.487 kb	chr8	43530554	1		OPPOSITE
1BaSB11_SBONC6	kcnip3l	5 prime	51.283 kb	chr8	44190336	807		OPPOSITE
1BaSB11_SBONC6				chr8	44921215	7
1BaSB11_SBONC6				chr8	44962921	8
1BaSB11_SBONC6	ndfip1l	5 prime	13.748 kb	chr8	45189182	3		SAME
1BaSB11_SBONC6	zgc:113060	3 prime	35.342 kb	chr8	45409813	3		OPPOSITE
1BaSB11_SBONC6	mtor	intron 32	within gene	chr8	46663553	5		SAME
1BaSB11_SBONC6	fam160b2	intron 12	within gene	chr8	46860469		3	SAME
1BaSB11_SBONC6	fam160b2	intron 12	within gene	chr8	46860471		1	SAME
1BaSB11_SBONC6	ywhab2	5 prime	70.536 kb	chr8	47664739	1		OPPOSITE
1BaSB11_SBONC6				chr8	47946697	5
1BaSB11_SBONC6	LOC559147	5 prime	2.945 kb	chr8	48264246	147		OPPOSITE
1BaSB11_SBONC6	LOC567061	intron 8	within gene	chr8	48364698	12		OPPOSITE
1BaSB11_SBONC6	LOC567061	intron 10	within gene	chr8	48391605	1		SAME
1BaSB11_SBONC6	LOC567061	intron 11	within gene	chr8	48399445	1		OPPOSITE
1BaSB11_SBONC6	pex10	5 prime	8.064 kb	chr8	48671743	1		SAME
1BaSB11_SBONC6	pex10	5 prime	19.888 kb	chr8	48683567		1	OPPOSITE
1BaSB11_SBONC6	pex10	5 prime	73.795 kb	chr8	48737474	6		SAME
1BaSB11_SBONC6				chr8	48909738	2
1BaSB11_SBONC6	si:dkeyp-104h9.5	3 prime	1.619 kb	chr8	49342660		2	SAME
1BaSB11_SBONC6	si:ch211-251b21.1	5 prime	5.499 kb	chr8	49542222	517		OPPOSITE
1BaSB11_SBONC6	wdr8	5 prime	0.648 kb	chr8	49996499	10		OPPOSITE
1BaSB11_SBONC6	tp73	3 prime	4.853 kb	chr8	50088406	1	1	OPPOSITE
1BaSB11_SBONC6	zgc:154013	intron 9	within gene	chr8	50282079	1		OPPOSITE
1BaSB11_SBONC6	sypb	intron 6	within gene	chr8	50556549	5		SAME
1BaSB11_SBONC6	hirip5	3 prime	5.845 kb	chr8	50602569		17	OPPOSITE
1BaSB11_SBONC6				chr8	50701044		1
1BaSB11_SBONC6	npy8br	5 prime	53.209 kb	chr8	52626863	1	1	SAME
1BaSB11_SBONC6	tbx16	5 prime	49.047 kb	chr8	52747021		4	OPPOSITE
1BaSB11_SBONC6	vps13a	3 prime	177.621 kb	chr8	52858797	5		SAME
1BaSB11_SBONC6	vps13a	3 prime	103.907 kb	chr8	52932511	1		SAME
1BaSB11_SBONC6	zgc:110083	5 prime	41.643 kb	chr8	53644201		1065	SAME
1BaSB11_SBONC6	nr5a1a	intron 3	within gene	chr8	55020745	3	2	OPPOSITE
1BaSB11_SBONC6	nr5a1a	intron 6	within gene	chr8	55260881	6		OPPOSITE
1BaSB11_SBONC6	si:dkey-11f4.16	5 prime	5.586 kb	chr9	215787		7	OPPOSITE
1BaSB11_SBONC6	nrg1	3 prime	2.165 kb	chr9	967861	7		OPPOSITE
1BaSB11_SBONC6	nrg1	3 prime	4.248 kb	chr9	969944	10		SAME
1BaSB11_SBONC6				chr9	1103881	2
1BaSB11_SBONC6	zgc:85702	5 prime	81.020 kb	chr9	1686019	1		OPPOSITE
1BaSB11_SBONC6	zgc:162619	5 prime	58.151 kb	chr9	2277971	1		OPPOSITE
1BaSB11_SBONC6	si:ch211-222f23.6	5 prime	23.416 kb	chr9	2487756		2	SAME
1BaSB11_SBONC6	rnf150	intron 11	within gene	chr9	2525820	6		SAME
1BaSB11_SBONC6	rnf150	intron 4	within gene	chr9	2691704	1		OPPOSITE
1BaSB11_SBONC6	rnf150	5 prime	21.094 kb	chr9	2767870	1		OPPOSITE
1BaSB11_SBONC6	dync1i2a	intron 7	within gene	chr9	3054938	16		SAME
1BaSB11_SBONC6	dync1i2a	intron 7	within gene	chr9	3112048	4		OPPOSITE
1BaSB11_SBONC6	sp3	intron 2	within gene	chr9	3219905	10		SAME
1BaSB11_SBONC6	chn1	5 prime	0.258 kb	chr9	3483208	1		SAME
1BaSB11_SBONC6	mettl8	3 prime	38.962 kb	chr9	3940062	1		SAME
1BaSB11_SBONC6	sp5	5 prime	57.496 kb	chr9	4095480	1		OPPOSITE
1BaSB11_SBONC6	sp5	5 prime	83.387 kb	chr9	4251967		1	SAME
1BaSB11_SBONC6				chr9	4329442		1
1BaSB11_SBONC6				chr9	4463991	2
1BaSB11_SBONC6	prpf40a	3 prime	83.116 kb	chr9	4606767	2		SAME
1BaSB11_SBONC6	prpf40a	3 prime	49.252 kb	chr9	4640631	1		SAME
1BaSB11_SBONC6	mylk	5 prime	35.030 kb	chr9	4979126	58		OPPOSITE
1BaSB11_SBONC6	pdzk1l	intron 3	within gene	chr9	5245527		4	SAME
1BaSB11_SBONC6	pdzk1l	3 prime	12.808 kb	chr9	5312990	1		OPPOSITE
1BaSB11_SBONC6	pdzk1l	3 prime	71.360 kb	chr9	5371542	1		OPPOSITE
1BaSB11_SBONC6				chr9	5417405	5
1BaSB11_SBONC6	st6gal2	intron 4	within gene	chr9	5556970		48	SAME
1BaSB11_SBONC6	uxs1	intron 1	within gene	chr9	5758435	1		OPPOSITE
1BaSB11_SBONC6	nck2a	5 prime	48.044 kb	chr9	6040786		1	OPPOSITE
1BaSB11_SBONC6	zgc:113334	5 prime	5.500 kb	chr9	6368602	1		OPPOSITE
1BaSB11_SBONC6	inpp4a	intron 1	within gene	chr9	6448992	2	4	SAME
1BaSB11_SBONC6	ihha	5 prime	21.749 kb	chr9	6781072	1		SAME
1BaSB11_SBONC6	ptprn	3 prime	11.154 kb	chr9	7101649		1	OPPOSITE
1BaSB11_SBONC6	zgc:171776	5 prime	24.286 kb	chr9	7342843		1	SAME
1BaSB11_SBONC6	si:ch211-235e18.3	5 prime	38.368 kb	chr9	7737753	5	3	SAME
1BaSB11_SBONC6				chr9	8323855		1
1BaSB11_SBONC6				chr9	8423425	1
1BaSB11_SBONC6	cbsb	3 prime	65.062 kb	chr9	8548397	1		SAME
1BaSB11_SBONC6	u2af1	intron 7	within gene	chr9	8617845	1		SAME
1BaSB11_SBONC6	u2af1	5 prime	21.791 kb	chr9	8648999		2	SAME
1BaSB11_SBONC6	zgc:113337	5 prime	56.216 kb	chr9	8788792	21		SAME
1BaSB11_SBONC6	gsk3b	exon 11	within gene	chr9	8964266	1419		SAME
1BaSB11_SBONC6	gsk3b	exon 11	within gene	chr9	8964268	1		SAME
1BaSB11_SBONC6	prmt2	3 prime	18.376 kb	chr9	9269639	1		OPPOSITE
1BaSB11_SBONC6	wu:fc17a11	3 prime	5.775 kb	chr9	10073912		4	OPPOSITE
1BaSB11_SBONC6	accn4a	3 prime	82.236 kb	chr9	10859416	1		SAME
1BaSB11_SBONC6	accn4a	3 prime	82.238 kb	chr9	10859418	973		SAME
1BaSB11_SBONC6	wnt10a	5 prime	75.328 kb	chr9	10889505	1		SAME
1BaSB11_SBONC6	itgav	intron 22	within gene	chr9	11187481	88		SAME
1BaSB11_SBONC6	LOC565294	3 prime	189.997 kb	chr9	11421527	5		OPPOSITE
1BaSB11_SBONC6	fzd7a	3 prime	24.437 kb	chr9	12885200	2		OPPOSITE
1BaSB11_SBONC6	zgc:153663	3 prime	13.990 kb	chr9	13368032	4		OPPOSITE
1BaSB11_SBONC6	si:ch211-67e16.9	5 prime	31.166 kb	chr9	13716821	4		OPPOSITE
1BaSB11_SBONC6				chr9	14416167		198
1BaSB11_SBONC6				chr9	14478019		1
1BaSB11_SBONC6				chr9	14597321		1
1BaSB11_SBONC6				chr9	14737388	1
1BaSB11_SBONC6	fn1	intron 9	within gene	chr9	14966588	4		OPPOSITE
1BaSB11_SBONC6	fn1	intron 4	within gene	chr9	14974616	107		SAME
1BaSB11_SBONC6	fn1	5 prime	28.407 kb	chr9	15006967		1	SAME
1BaSB11_SBONC6				chr9	15141218	1
1BaSB11_SBONC6	fbxl3a	3 prime	80.670 kb	chr9	15279566		13	OPPOSITE
1BaSB11_SBONC6	mycbp2	3 prime	256.889 kb	chr9	15727817	79		SAME
1BaSB11_SBONC6	mycbp2	intron 69	within gene	chr9	15767236	1		SAME
1BaSB11_SBONC6	si:dkey-18l1.1	intron 15	within gene	chr9	16426121	1135		SAME
1BaSB11_SBONC6	si:dkey-18l1.1	intron 12	within gene	chr9	16449816		2	OPPOSITE
1BaSB11_SBONC6	crfb4	3 prime	177.914 kb	chr9	16798719	1		SAME
1BaSB11_SBONC6	dnajc15	5 prime	118.016 kb	chr9	17453186		1	OPPOSITE
1BaSB11_SBONC6	dnajc15	3 prime	18.701 kb	chr9	17589903	1		OPPOSITE
1BaSB11_SBONC6	dnajc15	3 prime	24.554 kb	chr9	17595756	210		OPPOSITE
1BaSB11_SBONC6				chr9	17706148	163
1BaSB11_SBONC6	tsc22d1	5 prime	15.789 kb	chr9	18044550	3		OPPOSITE
1BaSB11_SBONC6	LOC569532	intron 3	within gene	chr9	18359276	1		SAME
1BaSB11_SBONC6	crfb1	intron 2	within gene	chr9	18407186	1	1	OPPOSITE
1BaSB11_SBONC6	zgc:101659	exon 2	within gene	chr9	18677856	1		OPPOSITE
1BaSB11_SBONC6	si:ch211-247j6.1	3 prime	394.357 kb	chr9	19330122	1		SAME
1BaSB11_SBONC6	si:ch211-247j6.1	3 prime	383.654 kb	chr9	19340825	1		OPPOSITE
1BaSB11_SBONC6	si:ch211-247j6.1	3 prime	346.754 kb	chr9	19377725		343	OPPOSITE
1BaSB11_SBONC6				chr9	19841035		1
1BaSB11_SBONC6				chr9	19978961	2
1BaSB11_SBONC6	kctd12.1	3 prime	36.350 kb	chr9	21235813		2	SAME
1BaSB11_SBONC6	etv5a	5 prime	63.019 kb	chr9	21939748	1		OPPOSITE
1BaSB11_SBONC6	rif1	3 prime	10.339 kb	chr9	22166256	1		OPPOSITE
1BaSB11_SBONC6	rif1	3 prime	10.340 kb	chr9	22166257	1		OPPOSITE
1BaSB11_SBONC6	rif1	3 prime	46.852 kb	chr9	22202769	1		OPPOSITE
1BaSB11_SBONC6	arl5a	3 prime	23.239 kb	chr9	22248869	1		OPPOSITE
1BaSB11_SBONC6	arl5a	3 prime	16.607 kb	chr9	22255501	1		OPPOSITE
1BaSB11_SBONC6				chr9	22867119	1
1BaSB11_SBONC6				chr9	22875147	1	3
1BaSB11_SBONC6	tas2r203	5 prime	3.225 kb	chr9	22984354	1		OPPOSITE
1BaSB11_SBONC6	si:ch211-219a4.10	5 prime	8.228 kb	chr9	23212996		3	SAME
1BaSB11_SBONC6	zgc:123096	3 prime	32.045 kb	chr9	23552032		1	OPPOSITE
1BaSB11_SBONC6				chr9	24139075	1	411
1BaSB11_SBONC6				chr9	24230132	1
1BaSB11_SBONC6	slc39a10	3 prime	12.575 kb	chr9	24372284	334		SAME
1BaSB11_SBONC6	slc39a10	3 prime	93.644 kb	chr9	24453353	1		OPPOSITE
1BaSB11_SBONC6	esd	3 prime	62.181 kb	chr9	24529556	1		SAME
1BaSB11_SBONC6	esd	5 prime	68.668 kb	chr9	24660405		160	OPPOSITE
1BaSB11_SBONC6				chr9	25057667	2	2
1BaSB11_SBONC6	zeb2a	intron 1	within gene	chr9	25188371	1		SAME
1BaSB11_SBONC6	zeb2a	intron 1	within gene	chr9	25215269	8		SAME
1BaSB11_SBONC6	LOC100003547	5 prime	20.824 kb	chr9	25420972	1		OPPOSITE
1BaSB11_SBONC6				chr9	25665095	1
1BaSB11_SBONC6				chr9	25956246		4
1BaSB11_SBONC6				chr9	25968684		2
1BaSB11_SBONC6				chr9	26235194	24
1BaSB11_SBONC6	kirrel3	3 prime	151.520 kb	chr9	26560842	1		SAME
1BaSB11_SBONC6	kirrel3	5 prime	53.084 kb	chr9	26765446	1		SAME
1BaSB11_SBONC6				chr9	26921482	1
1BaSB11_SBONC6	si:ch211-194d6.1	intron 18	within gene	chr9	27261481		365	SAME
1BaSB11_SBONC6	zgc:153683	3 prime	83.755 kb	chr9	27781972		1	OPPOSITE
1BaSB11_SBONC6	klf7l	3 prime	1.747 kb	chr9	28286168	243		SAME
1BaSB11_SBONC6	klf7l	3 prime	36.780 kb	chr9	28321201	1		OPPOSITE
1BaSB11_SBONC6	pth2r	intron 8	within gene	chr9	29656746	1		OPPOSITE
1BaSB11_SBONC6	hs6st3	intron 1	within gene	chr9	29811044	1		SAME
1BaSB11_SBONC6	cx45.6	5 prime	18.825 kb	chr9	30854506	1		OPPOSITE
1BaSB11_SBONC6	clybl	intron 1	within gene	chr9	31606300	7		OPPOSITE
1BaSB11_SBONC6	zic2a	3 prime	0.681 kb	chr9	31686367		1	OPPOSITE
1BaSB11_SBONC6	zic2a	3 prime	7.567 kb	chr9	31693253		1	OPPOSITE
1BaSB11_SBONC6	tmtc4	3 prime	54.578 kb	chr9	31869174		2	OPPOSITE
1BaSB11_SBONC6	hspe1	exon 2	within gene	chr9	32704195	2		SAME
1BaSB11_SBONC6	olig2	3 prime	10.371 kb	chr9	33143843	1		SAME
1BaSB11_SBONC6	si:ch211-39h10.1	3 prime	26.556 kb	chr9	33286781	1		OPPOSITE
1BaSB11_SBONC6	rpl8	5 prime	1.541 kb	chr9	33731186	1		SAME
1BaSB11_SBONC6	mao	intron 13	within gene	chr9	34018772	31		SAME
1BaSB11_SBONC6	efhc2	exon 4	within gene	chr9	34134647	28		SAME
1BaSB11_SBONC6	fundc1	5 prime	22.354 kb	chr9	34161650	2		SAME
1BaSB11_SBONC6	me3	exon 6	within gene	chr9	34574178		68	OPPOSITE
1BaSB11_SBONC6	med14	3 prime	56.659 kb	chr9	34796934		1	OPPOSITE
1BaSB11_SBONC6	tslpr	3 prime	55.943 kb	chr9	35102756	1		OPPOSITE
1BaSB11_SBONC6	tslpr	3 prime	55.941 kb	chr9	35102758	1067		OPPOSITE
1BaSB11_SBONC6	cdc16	intron 17	within gene	chr9	35237484		1	SAME
1BaSB11_SBONC6	cdc16	intron 17	within gene	chr9	35237486		280	SAME
1BaSB11_SBONC6	zgc:172067	5 prime	0.383 kb	chr9	35291160		1	OPPOSITE
1BaSB11_SBONC6	ncam2	intron 15	within gene	chr9	35517891		2	SAME
1BaSB11_SBONC6	ncam2	intron 14	within gene	chr9	35529413	1		OPPOSITE
1BaSB11_SBONC6				chr9	36571171	1	4
1BaSB11_SBONC6	ralba	intron 1	within gene	chr9	37539606		1	SAME
1BaSB11_SBONC6	gli2a	5 prime	164.006 kb	chr9	37765781	1		OPPOSITE
1BaSB11_SBONC6	LOC562077	intron 16	within gene	chr9	39031142	11		OPPOSITE
1BaSB11_SBONC6				chr9	39957241	1
1BaSB11_SBONC6				chr9	40189279		1
1BaSB11_SBONC6				chr9	40557306	2
1BaSB11_SBONC6	vwc2l	3 prime	16.142 kb	chr9	40890143		3	OPPOSITE
1BaSB11_SBONC6	vwc2l	3 prime	48.643 kb	chr9	40922644	2		OPPOSITE
1BaSB11_SBONC6	vwc2l	3 prime	78.920 kb	chr9	40952921		34	OPPOSITE
1BaSB11_SBONC6	pofut2	3 prime	24.495 kb	chr9	41106093		1	OPPOSITE
1BaSB11_SBONC6	si:dkey-204g5.2	intron 1	within gene	chr9	41295162	764		OPPOSITE
1BaSB11_SBONC6	wdr75	intron 1	within gene	chr9	41408875	7		OPPOSITE
1BaSB11_SBONC6	stat1b	intron 7	within gene	chr9	41483297	3		OPPOSITE
1BaSB11_SBONC6	stat1b	3 prime	33.176 kb	chr9	41536993	366		OPPOSITE
1BaSB11_SBONC6	col18a1	intron 7	within gene	chr9	42215612		1	SAME
1BaSB11_SBONC6	pcbp3	5 prime	50.604 kb	chr9	42316018	1		SAME
1BaSB11_SBONC6	lrrc3	3 prime	98.124 kb	chr9	42519489	3		OPPOSITE
1BaSB11_SBONC6	calcrla	3 prime	91.351 kb	chr9	42583736		1	SAME
1BaSB11_SBONC6	calcrla	intron 1	within gene	chr9	42651564		1	SAME
1BaSB11_SBONC6	calcrla	intron 1	within gene	chr9	42666450	1		OPPOSITE
1BaSB11_SBONC6	si:xx-35d8.1	5 prime	72.008 kb	chr9	42834849	1		OPPOSITE
1BaSB11_SBONC6	si:xx-35d8.1	5 prime	71.991 kb	chr9	42834866	1		SAME
1BaSB11_SBONC6	zgc:153452	intron 7	within gene	chr9	43968507		1	SAME
1BaSB11_SBONC6	zgc:162213	3 prime	6.983 kb	chr9	44690165		116	SAME
1BaSB11_SBONC6	twist2	3 prime	16.132 kb	chr9	46160364	1		OPPOSITE
1BaSB11_SBONC6	traf3ip1	intron 13	within gene	chr9	46575125		1	SAME
1BaSB11_SBONC6				chr9	46759188	1
1BaSB11_SBONC6				chr9	47108084	3
1BaSB11_SBONC6				chr9	47318153		1
1BaSB11_SBONC6	nckap1	intron 20	within gene	chr9	47783572	6		SAME
1BaSB11_SBONC6	xrcc5	intron 5	within gene	chr9	48163670	5		OPPOSITE
1BaSB11_SBONC6				chr9	48473191	231
1BaSB11_SBONC6				chr9	48693808	11
1BaSB11_SBONC6				chr9	48731709	1
1BaSB11_SBONC6				chr9	49592779		2
1BaSB11_SBONC6				chr9	49625109		2
1BaSB11_SBONC6	cx43.4	5 prime	86.027 kb	chr9	50118747	1		OPPOSITE
1BaSB11_SBONC6	zgc:92380	5 prime	160.810 kb	chr9	50280553	4		OPPOSITE
1BaSB11_SBONC6	mettl5	5 prime	24.410 kb	chr9	50510499		1	OPPOSITE
1BaSB11_SBONC6	rdh1l	intron 1	within gene	chr9	51107030	3		OPPOSITE
1BaSB11_SBONC6	dap1b	3 prime	78.801 kb	chr9	51440365	4		SAME
1BaSB11_SBONC6	cog3	intron 1	within gene	chr9	51724627	84		SAME
1BaSB11_SBONC6	cog3	intron 1	within gene	chr9	51726543	40		OPPOSITE
1BaSB11_SBONC6	cog3	intron 12	within gene	chr9	51798975	1		OPPOSITE
1BaSB11_SBONC6				chr9	52136597	1
1BaSB11_SBONC6	pcdh8	3 prime	92.312 kb	chr9	52182120	3	1	SAME
1BaSB11_SBONC6	pcdh8	exon 1	within gene	chr9	52274160	10		SAME
1BaSB11_SBONC6	egfl6	intron 7	within gene	chr9	52316871	6		SAME
1BaSB11_SBONC6	ofd1	intron 11	within gene	chr9	52579251	1		SAME
1BaSB11_SBONC6	glra2	exon 2	within gene	chr9	52743932	1		SAME
1BaSB11_SBONC6	fancb	3 prime	85.412 kb	chr9	53211738	1		SAME
1BaSB11_SBONC6	prdm5	intron 14	within gene	chr9	53725499	1		SAME
1BaSB11_SBONC6	edar	intron 8	within gene	chr9	54313070	1		SAME
1BaSB11_SBONC6	rab3gap1	intron 8	within gene	chr9	54585166		29	OPPOSITE
1BaSB11_SBONC6	unc5c	intron 1	within gene	chr10	200158	2		SAME
1BaSB11_SBONC6	unc5c	intron 1	within gene	chr10	234044	1		SAME
1BaSB11_SBONC6	glis3	5 prime	122.914 kb	chr10	799052	6		SAME
1BaSB11_SBONC6	glis3	5 prime	114.107 kb	chr10	807859		1	SAME
1BaSB11_SBONC6	bmpr1bb	intron 3	within gene	chr10	1290489		1	SAME
1BaSB11_SBONC6	oep	5 prime	95.018 kb	chr10	1859417	2	1	OPPOSITE
1BaSB11_SBONC6	oep	exon 7	within gene	chr10	1953950	7	1	SAME
1BaSB11_SBONC6	gdnf	3 prime	47.227 kb	chr10	2381281	3		OPPOSITE
1BaSB11_SBONC6	zgc:55536	5 prime	17.722 kb	chr10	2900784	80		SAME
1BaSB11_SBONC6	ddx56	5 prime	27.506 kb	chr10	2970809	2		OPPOSITE
1BaSB11_SBONC6	oclna	5 prime	45.084 kb	chr10	3055580	1		SAME
1BaSB11_SBONC6	oclna	5 prime	45.284 kb	chr10	3055780	1		OPPOSITE
1BaSB11_SBONC6				chr10	4179009		1
1BaSB11_SBONC6				chr10	4321194	14
1BaSB11_SBONC6	nrxn3b	3 prime	144.730 kb	chr10	4647553		1	SAME
1BaSB11_SBONC6	zgc:86759	intron 2	within gene	chr10	4684146		2	SAME
1BaSB11_SBONC6	zgc:113274	3 prime	38.625 kb	chr10	5401977	2		OPPOSITE
1BaSB11_SBONC6	zgc:173506	exon 37	within gene	chr10	6008966	227		SAME
1BaSB11_SBONC6	vasa	5 prime	36.961 kb	chr10	7297295		1	SAME
1BaSB11_SBONC6	rasgef1bb	intron 3	within gene	chr10	8555228	1		OPPOSITE
1BaSB11_SBONC6	anxa3b	5 prime	24.899 kb	chr10	8684620	2		OPPOSITE
1BaSB11_SBONC6	ndufa8	3 prime	28.258 kb	chr10	8838237		123	OPPOSITE
1BaSB11_SBONC6	pmaip1	3 prime	2.842 kb	chr10	9165882	1		OPPOSITE
1BaSB11_SBONC6	zgc:152984	3 prime	10.388 kb	chr10	10246203		3	SAME
1BaSB11_SBONC6	lmnb1	3 prime	40.040 kb	chr10	10755012		1	OPPOSITE
1BaSB11_SBONC6	cntfr	intron 1	within gene	chr10	11598033	1	1	OPPOSITE
1BaSB11_SBONC6	cntfr	intron 1	within gene	chr10	11631882	1		SAME
1BaSB11_SBONC6				chr10	11812958	1
1BaSB11_SBONC6				chr10	12084480	2
1BaSB11_SBONC6				chr10	12136533	17
1BaSB11_SBONC6	hdhd2	5 prime	97.731 kb	chr10	12507159	1		OPPOSITE
1BaSB11_SBONC6				chr10	12536476	1
1BaSB11_SBONC6	zgc:153463	5 prime	146.589 kb	chr10	12541690	9		OPPOSITE
1BaSB11_SBONC6	zgc:56702	3 prime	162.410 kb	chr10	12917977	18		OPPOSITE
1BaSB11_SBONC6	zgc:56702	3 prime	153.747 kb	chr10	12926640	1		OPPOSITE
1BaSB11_SBONC6	zgc:114201	5 prime	3.763 kb	chr10	13092461	1		SAME
1BaSB11_SBONC6	zgc:112138	5 prime	30.710 kb	chr10	13805683	1		SAME
1BaSB11_SBONC6				chr10	14495374	207
1BaSB11_SBONC6				chr10	14620006	35
1BaSB11_SBONC6	zgc:158652	3 prime	25.110 kb	chr10	15063384	1		SAME
1BaSB11_SBONC6	zgc:158652	3 prime	19.091 kb	chr10	15069403	5		SAME
1BaSB11_SBONC6				chr10	16087333		2
1BaSB11_SBONC6				chr10	16362907	1	3
1BaSB11_SBONC6				chr10	16552230	1
1BaSB11_SBONC6	prkab1a	5 prime	13.926 kb	chr10	16796589	192		OPPOSITE
1BaSB11_SBONC6	atp6v1b2	5 prime	19.796 kb	chr10	17433673		2	SAME
1BaSB11_SBONC6	zgc:103508	5 prime	13.606 kb	chr10	17482595		50	OPPOSITE
1BaSB11_SBONC6	cldn7b	5 prime	58.787 kb	chr10	18067238	1		SAME
1BaSB11_SBONC6				chr10	19353425		1
1BaSB11_SBONC6	prnprs1	5 prime	19.807 kb	chr10	19610365	2		OPPOSITE
1BaSB11_SBONC6	ppapdc1b	5 prime	10.622 kb	chr10	19682741	1		OPPOSITE
1BaSB11_SBONC6	loxl2a	intron 12	within gene	chr10	19869344	1		OPPOSITE
1BaSB11_SBONC6	xpo7	5 prime	31.564 kb	chr10	20239082	3		SAME
1BaSB11_SBONC6				chr10	20413888	2
1BaSB11_SBONC6				chr10	20555274	239
1BaSB11_SBONC6	tmem135	3 prime	41.899 kb	chr10	20697534	1		SAME
1BaSB11_SBONC6	arfip2b	5 prime	17.856 kb	chr10	21654002		3	OPPOSITE
1BaSB11_SBONC6	cxadr	3 prime	6.586 kb	chr10	22639829	1		SAME
1BaSB11_SBONC6				chr10	22887440	2
1BaSB11_SBONC6	arrb2a	5 prime	112.256 kb	chr10	23192507	2		SAME
1BaSB11_SBONC6	zgc:103508	3 prime	63.676 kb	chr10	23380635	1		OPPOSITE
1BaSB11_SBONC6	cadm2a	intron 1	within gene	chr10	24126646		1	SAME
1BaSB11_SBONC6	cadm2a	5 prime	6.033 kb	chr10	24447826		1	SAME
1BaSB11_SBONC6	cadm2a	5 prime	6.037 kb	chr10	24447830		3	SAME
1BaSB11_SBONC6	zgc:103664	intron 2	within gene	chr10	24961909	1		SAME
1BaSB11_SBONC6	fxc1	5 prime	45.382 kb	chr10	25385361	2		OPPOSITE
1BaSB11_SBONC6				chr10	25466130		2
1BaSB11_SBONC6	mir21-1	5 prime	12.824 kb	chr10	25821218		1	OPPOSITE
1BaSB11_SBONC6	btg3	5 prime	13.720 kb	chr10	26003942	1		SAME
1BaSB11_SBONC6				chr10	26220517	16
1BaSB11_SBONC6	alcama	intron 1	within gene	chr10	26444584	1		OPPOSITE
1BaSB11_SBONC6	alcama	5 prime	73.439 kb	chr10	26549778		1	SAME
1BaSB11_SBONC6	dlg2	intron 3	within gene	chr10	27166900	1		OPPOSITE
1BaSB11_SBONC6	dlg2	intron 16	within gene	chr10	27773020		1	SAME
1BaSB11_SBONC6	znf259	5 prime	5.045 kb	chr10	27930457	11		OPPOSITE
1BaSB11_SBONC6	si:rp71-56i13.6	intron 3	within gene	chr10	27976164		2	SAME
1BaSB11_SBONC6	ntm	intron 1	within gene	chr10	28387343	9		SAME
1BaSB11_SBONC6	ntm	intron 1	within gene	chr10	28424480		1	OPPOSITE
1BaSB11_SBONC6	ntm	intron 1	within gene	chr10	28455500		1	OPPOSITE
1BaSB11_SBONC6	foxo1b	intron 1	within gene	chr10	29911698	1		SAME
[truncated: 24,401 more rows]
